# Supplementary material for: Theoretical study on the photophysical properties of thiophene-fused-type BODIPY series molecules in fluorescence imaging and photodynamic therapy
Source: Royal Society of Chemistry journal article supplement (doi:10.1039/d4cp01346h), 2024-01-01
Supplement: d4cp01346h1.pdf [file d4cp01346h1.pdf]

Theoretical Study on Photophysical Properties of Thiophene-Fused-Type BODIPY Series  
Molecules in Fluorescence Imaging and Photodynamic Therapy

Jianfang Cao, <sup>\*a</sup> Xinyu Chen, <sup>a</sup> Xue Ma, <sup>a</sup> Tianci Zhang, <sup>a</sup> and Wen Sun <sup>\*b</sup>

<sup>a</sup> School of Chemical Engineering, Ocean and Life Sciences, Dalian University of Technology, Panjin Campus, Panjin, 124221, China

<sup>b</sup> State Key Laboratory of Fine Chemicals, Dalian University of Technology, No. 2 Linggong Road, High-tech District, Dalian, 116024, China

\*Corresponding author E-mail: [sunwen@dlut.edu.cn](mailto:sunwen@dlut.edu.cn), [caojf@dlut.edu.cn](mailto:caojf@dlut.edu.cn)

List of Figure and Table

|                                                                                                                                                                                                                                                                        |    |
|------------------------------------------------------------------------------------------------------------------------------------------------------------------------------------------------------------------------------------------------------------------------|----|
| <b>Table S1.</b> The main bond lengths, bond angles and dihedral angles of <b>thieno-fused BODIPYs</b> in $S_0$ state, $S_1$ state, $T_1$ state and $T_2$ state. ....                                                                                                  | 4  |
| <b>Table S2.</b> The main bond lengths, bond angles and dihedral angles of <b>thieno-pyrrole-fused BODIPYs</b> in $S_0$ state, $S_1$ state, $S_2$ State, $T_1$ state and $T_2$ state. ....                                                                             | 5  |
| <b>Figure S1.</b> Optimized configuration of <b>PY-BODIPY</b> (a), <b>PH-BODIPY</b> (b), <b>MeO-BODIPY</b> (c), and <b>DMA-BODIPY</b> (d). ....                                                                                                                        | 6  |
| <b>Figure S2.</b> Optimized configuration of <b>SBDPiR690</b> . ....                                                                                                                                                                                                   | 6  |
| <b>Figure S3.</b> Optimized configuration of <b>SBDPiR688</b> . ....                                                                                                                                                                                                   | 7  |
| <b>Figure S4.</b> Optimized configuration of <b>SBDPiR698</b> . ....                                                                                                                                                                                                   | 7  |
| <b>Figure S5.</b> Optimized configuration of <b>SBDPiR710</b> (left) and <b>SBDPiR731</b> (right). ....                                                                                                                                                                | 7  |
| <b>Table S3.</b> the energy separations for the absorption $\Delta E_{\text{abs}}(\text{nm})$ and corresponding oscillator strengths of the low-lying electronically excited states for <b>thiophene-fused-type BODIPY</b> . ....                                      | 8  |
| <b>Table S4.</b> the energy separations for the emission $\Delta E_{\text{em}}(\text{nm})$ and corresponding oscillator strengths of the low-lying electronically excited states for <b>thiophene-fused-type BODIPY</b> . ....                                         | 10 |
| <b>Table S5.</b> the energy of HOMO and HOMO-1 orbitals, and the energy difference between HOMO orbital and HOMO-1 orbital for <b>thiophene-fused-type BODIPY</b> . ....                                                                                               | 11 |
| <b>Figure S6.</b> Frontier molecular orbitals of $S_0$ and $S_1$ states geometries for the <b>PY-BODIPY</b> (a), <b>PH-BODIPY</b> (b) and <b>MeO-BODIPY</b> (c). ....                                                                                                  | 11 |
| <b>Figure S7.</b> Frontier molecular orbitals of $S_0$ and $S_1$ states geometries for the <b>SBDPiR690</b> (a), <b>SBDPiR688</b> (b), and <b>SBDPiR698</b> (c). ....                                                                                                  | 12 |
| <b>Figure S8.</b> Frontier molecular orbitals of $S_0$ and $S_1$ states geometries for the <b>SBDPiR710</b> (left), <b>SBDPiR731</b> (right). ....                                                                                                                     | 13 |
| <b>Figure S9.a.</b> Schematic illustration of the state-crossing from a locally excited to an electron-transfer state (SLEET) model and calculated excitation/de-excitation energy (as well as oscillator strength $f$ ) of <b>DMA-BODIPY</b> in dichloromethane. .... | 13 |
| <b>Figure S9.b.</b> Optimized molecular structures of <b>DMA-BODIPY</b> in the ground and excited states, as well as the corresponding electron and hole distributions in dichloromethane. ....                                                                        | 13 |

|                                                                                                                                                                                                                                                                                                         |           |
|---------------------------------------------------------------------------------------------------------------------------------------------------------------------------------------------------------------------------------------------------------------------------------------------------------|-----------|
| <b>Table S6.</b> Contribution of different fragments of <b>PY-BODIPY</b> to important frontier molecular orbitals in $S_0$ , $S_1$ , and $T_2$ states. ....                                                                                                                                             | 14        |
| <b>Table S7.</b> Contribution of different fragments of <b>PH-BODIPY</b> to important frontier molecular orbitals in $S_0$ , $S_1$ , and $T_2$ states. ....                                                                                                                                             | 15        |
| <b>Table S8.</b> Contribution of different fragments of <b>MeO-BODIPY</b> to important frontier molecular orbitals in $S_0$ , $S_1$ , and $T_2$ states. ....                                                                                                                                            | 16        |
| <b>Table S9.</b> Contribution of different fragments of <b>DMA-BODIPY</b> to important frontier molecular orbitals in $S_0$ , $S_1$ , and $T_2$ states. ....                                                                                                                                            | <b>17</b> |
| <b>Table S10.</b> Contribution of different fragments of <b>SBDPiR690</b> to important frontier molecular orbitals in $S_0$ , $S_1$ , and $T_2$ states. ....                                                                                                                                            | 18        |
| <b>Table S11.</b> Contribution of different fragments of <b>SBDPiR688</b> to important frontier molecular orbitals in $S_0$ , $S_1$ , and $T_2$ states. ....                                                                                                                                            | 19        |
| <b>Table S12.</b> Contribution of different fragments of <b>SBDPiR698</b> to important frontier molecular orbitals in $S_0$ , $S_1$ , and $T_2$ states. ....                                                                                                                                            | 20        |
| <b>Table S13.</b> Contribution of different fragments of <b>SBDPiR710</b> to important frontier molecular orbitals in $S_0$ , $S_1$ , and $T_2$ states. ....                                                                                                                                            | 21        |
| <b>Table S14.</b> Contribution of different fragments of <b>SBDPiR731</b> to important frontier molecular orbitals in $S_0$ , $S_1$ , and $T_2$ states. ....                                                                                                                                            | 22        |
| <b>Table S15.</b> Electron excitation characteristics of <b>PY-BODIPY</b> , <b>PH-BODIPY</b> , <b>MeO-BODIPY</b> in different transition states. ....                                                                                                                                                   | 23        |
| <b>Table S16.</b> Electron excitation characteristics of <b>SBDPiR690</b> in different transition states. ....                                                                                                                                                                                          | 24        |
| <b>Table S17.</b> Electron excitation characteristics of <b>SBDPiR688</b> in different transition states. ....                                                                                                                                                                                          | 24        |
| <b>Table S18.</b> Electron excitation characteristics of <b>SBDPiR698</b> in different transition states. ....                                                                                                                                                                                          | 25        |
| <b>Table S19.</b> Electron excitation characteristics of <b>SBDPiR710</b> , <b>SBDPiR731</b> and <b>DMA-BODIPY</b> in different transition states. It is important to note that the $S_0 \rightarrow S_2$ processes of <b>DMA-BODIPY</b> are attributed to CT excitation. ....                          | 25        |
| <b>Figure S10.</b> cele&chole graph in $S_0 \rightarrow S_1$ transition and difference map for electron density in $S_1 \rightarrow T_1$ , $S_1 \rightarrow T_2$ transition of <b>PY-BODIPY</b> . The figure S9-S11, S13-S16 can visually represent the electron excitation characteristics of LE. .... | 26        |
| <b>Figure S11.</b> cele&chole graph in $S_0 \rightarrow S_1$ transition and difference map for electron density in $S_1 \rightarrow T_1$ , $S_1 \rightarrow T_2$ transition of <b>PH-BODIPY</b> . ....                                                                                                  | 26        |
| <b>Figure S12.</b> cele&chole graph in $S_0 \rightarrow S_1$ transition and difference map for electron density in $S_1 \rightarrow T_1$ , $S_1 \rightarrow T_2$ transition of <b>MeO-BODIPY</b> . ....                                                                                                 | 26        |
| <b>Figure S13.</b> cele&chole graph in $S_0 \rightarrow S_1$ and $S_0 \rightarrow S_2$ transition of <b>DMA-BODIPY</b> . ....                                                                                                                                                                           | 27        |
| <b>Figure S14.</b> cele&chole graph in $S_0 \rightarrow S_1$ and $S_0 \rightarrow S_4$ transition, difference map for electron density in $S_1 \rightarrow T_1$ , $S_1 \rightarrow T_2$ and $S_2 \rightarrow T_2$ transition of <b>SBDPiR690</b> . ....                                                 | 27        |
| <b>Figure S15.</b> cele&chole graph in $S_0 \rightarrow S_1$ and $S_0 \rightarrow S_4$ transition, difference map for electron density in $S_1 \rightarrow T_1$ , $S_1 \rightarrow T_2$ and $S_2 \rightarrow T_2$ transition of <b>SBDPiR688</b> . ....                                                 | 27        |
| <b>Figure S16.</b> cele&chole graph in $S_0 \rightarrow S_1$ and $S_0 \rightarrow S_4$ transition, difference map for electron density in $S_1 \rightarrow T_1$ , $S_1 \rightarrow T_2$ and $S_2 \rightarrow T_2$ transition of <b>SBDPiR698</b> . ....                                                 | 28        |
| <b>Figure S17.</b> cele&chole graph in $S_0 \rightarrow S_1$ transition of <b>SBDPiR710</b> (left) and <b>SBDPiR731</b> (right). ....                                                                                                                                                                   | 28        |
| <b>Table S20.</b> The adiabatic energy of the ground state, singlet and triplet excited-states at their optimized geometries, along with SOC between the involved $T_1$ and $S_1$ states, $T_2$ and $S_1$ states. ....                                                                                  | 29        |
| <b>Table S21.</b> The adiabatic energy of the ground state, singlet and triplet excited-states at their optimized                                                                                                                                                                                       |           |

|                                                                                                                                                                                                                                                                                                                                                        |    |
|--------------------------------------------------------------------------------------------------------------------------------------------------------------------------------------------------------------------------------------------------------------------------------------------------------------------------------------------------------|----|
| geometries, along with SOC between the involved $T_1$ and $S_1$ states, $T_2$ and $S_1$ states, $T_2$ and $S_2$ states. ....                                                                                                                                                                                                                           | 30 |
| <b>Figure S18.</b> (a) Electrostatic potential surface plots of <b>PY-BODIPY</b> at the $S_0$ state(left), $S_1$ (middle) state and $T_1$ (right) state. (b) <b>PH-BODIPY</b> , (c) <b>MeO-BODIPY</b> , (d) <b>DMA-BODIPY</b> , (e) <b>SBDPiR690</b> , (f) <b>SBDPiR688</b> , (g) <b>SBDPiR698</b> , (h) <b>SBDPiR710</b> , (i) <b>SBDPiR731</b> ..... | 32 |
| XYZcoordinates(angstrom) .....                                                                                                                                                                                                                                                                                                                         | 33 |

**Table S1.** The main bond lengths, bond angles and dihedral angles of **thieno-fused BODIPYs** in  $S_0$  state,  $S_1$  state,  $T_1$  state and  $T_2$  state. The four carbon atoms we selected are labeled as C1, C2, C3, and C4, representing the Cartesian coordinates of all atoms as C1, C6, C23, and C27 of thieno-fused BODIPYs.

| Compound       |                                | $S_0$ State | $S_1$ State | $T_1$ State | $T_2$ State |
|----------------|--------------------------------|-------------|-------------|-------------|-------------|
| PY-BODIPY      | Bond Length (Å) C2-C3          | 1.48796     | 1.48365     | 1.48733     | 1.48614     |
|                | Bond Angle (°) C2-C3-C4        | 120.67268   | 121.09377   | 121.22662   | 121.14302   |
|                | Dihedral Angle (°) C1-C2-C3-C4 | 98.36639    | 107.52498   | 104.05061   | 106.54507   |
| PH-BODIPY      | Bond Length (Å) C2-C3          | 1.48749     | 1.48227     | 1.48988     | 1.48803     |
|                | Bond Angle (°) C2-C3-C4        | 119.97279   | 120.34751   | 120.48396   | 120.24374   |
|                | Dihedral Angle (°) C1-C2-C3-C4 | 78.40109    | 75.77424    | 80.79959    | 75.20968    |
| MeO-BODIP<br>Y | Bond Length (Å) C2-C3          | 1.48390     | 1.48413     | 1.48881     | 1.48673     |
|                | Bond Angle (°) C2-C3-C4        | 120.40799   | 120.80012   | 120.87838   | 120.80525   |
|                | Dihedral Angle (°) C1-C2-C3-C4 | 73.66560    | 74.65567    | 81.77093    | 75.10703    |
| DMA-BODIP<br>Y | Bond Length (Å) C2-C3          | 1.47783     | 1.48261     | 1.48796     | 1.43154     |
|                | Bond Angle (°) C2-C3-C4        | 120.88755   | 121.21358   | 121.24578   | 121.53722   |
|                | Dihedral Angle (°) C1-C2-C3-C4 | 67.89207    | 73.82960    | 82.09652    | 46.96493    |

**Table S2.** The main bond lengths, bond angles and dihedral angles of **thieno-pyrrole-fused BODIPYs** in S<sub>0</sub> state, S<sub>1</sub> state, S<sub>2</sub> State, T<sub>1</sub> state and T<sub>2</sub> state.

| Compound  |                                   | S <sub>0</sub> State | S <sub>1</sub> State | S <sub>2</sub> State | T <sub>1</sub> State | T <sub>2</sub> State |
|-----------|-----------------------------------|----------------------|----------------------|----------------------|----------------------|----------------------|
| SBDPiR690 | Bond Length (Å)<br>C2-C3          | 1.46763              | 1.45099              | 1.46578              | 1.45703              | 1.46713              |
|           | Bond Angle (°)<br>S1-C2-C3        | 119.19373            | 119.85947            | 120.00602            | 119.97025            | 119.74379            |
|           | Dihedral Angle (°)<br>S1-C2-C3-C4 | 26.24437             | 13.81367             | -27.58247            | 16.63516             | -29.34571            |
|           | Bond Length (Å)<br>C2-C3          | 1.46863              | 1.45234              | 1.46524              | 1.45821              | 1.46642              |
| SBDPiR688 | Bond Angle (°)<br>S1-C2-C3        | 119.19072            | 119.80616            | 120.17813            | 120.01495            | 119.80341            |
|           | Dihedral Angle (°)<br>S1-C2-C3-C4 | 27.44457             | 14.19720             | -22.08699            | 16.93403             | -28.44904            |
|           | Bond Length (Å)<br>C2-C3          | 1.46695              | 1.45053              | 1.46615              | 1.45621              | 1.46697              |
| SBDPiR698 | Bond Angle (°)<br>S1-C2-C3        | 119.15894            | 119.88483            | 120.01912            | 119.98403            | 119.80674            |
|           | Dihedral Angle (°)<br>S1-C2-C3-C4 | 27.62688             | 15.24278             | -28.20102            | 17.04600             | -30.74159            |
|           | Bond Length (Å)<br>C2-C3          | 1.46552              | 1.44747              | 1.46524              | 1.45433              | 1.46598              |
| SBDPiR710 | Bond Angle (°)<br>S1-C2-C3        | 119.22686            | 120.06730            | 119.98196            | 119.93473            | 119.71584            |
|           | Dihedral Angle (°)<br>S1-C2-C3-C4 | 24.79347             | 5.37134              | -26.43537            | 15.65810             | -29.22379            |
|           | Bond Length (Å)<br>C2-C3          | 1.46338              | 1.44315              | 1.46480              | 1.44840              | 1.46791              |
| SBDPiR731 | Bond Angle (°)<br>S1-C2-C3        | 119.40899            | 120.20107            | 119.80743            | 120.10372            | 119.76413            |
|           | Dihedral Angle (°)<br>S1-C2-C3-C4 | 19.88882             | 4.89380              | 26.06526             | 12.63735             | 27.80297             |

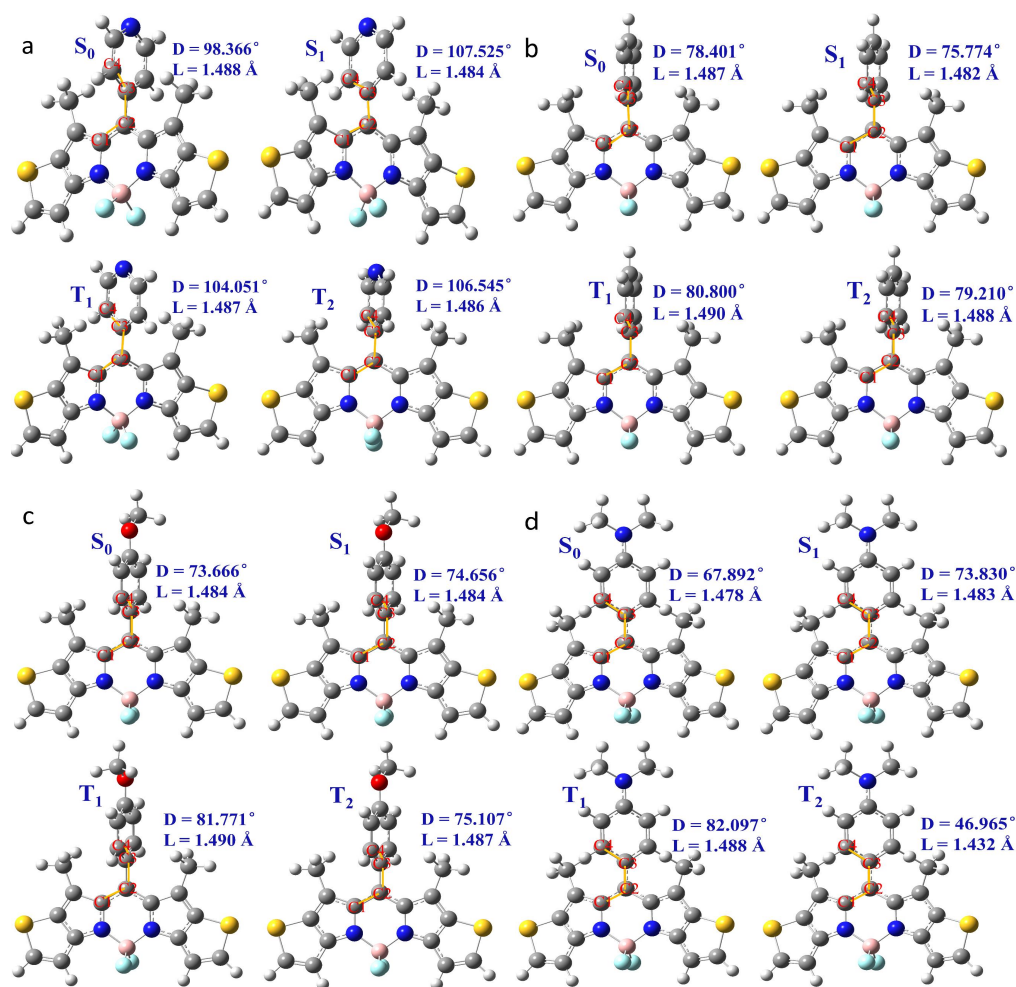

Figure S1. Optimized configuration of PY-BODIPY (a), PH-BODIPY (b), MeO-BODIPY (c), and DMA-BODIPY (d).

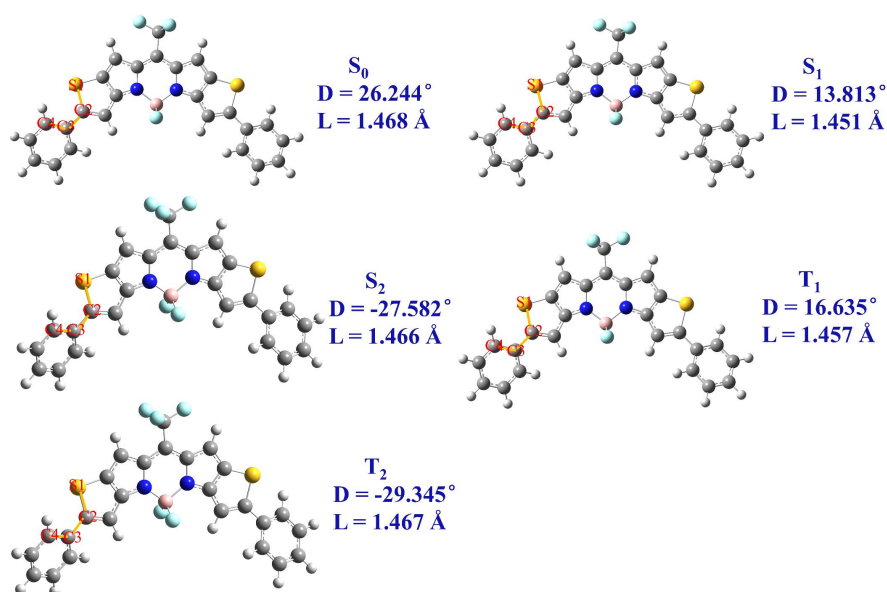

Figure S2. Optimized configuration of SBDPIR690.

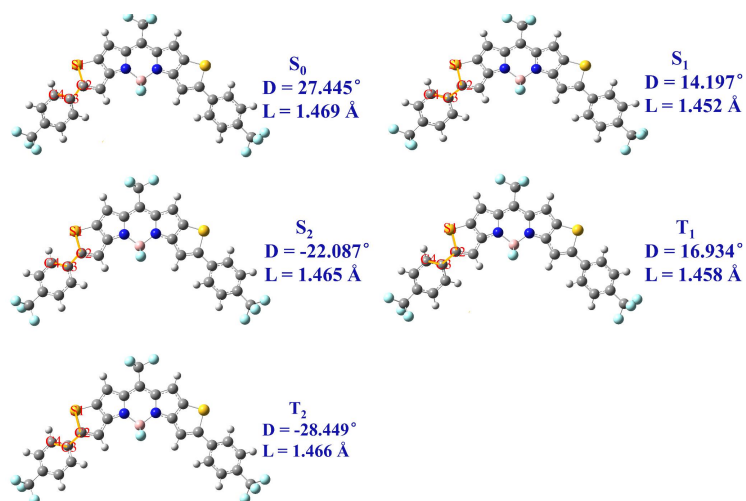

Figure S3. Optimized configuration of SBDPiR688.

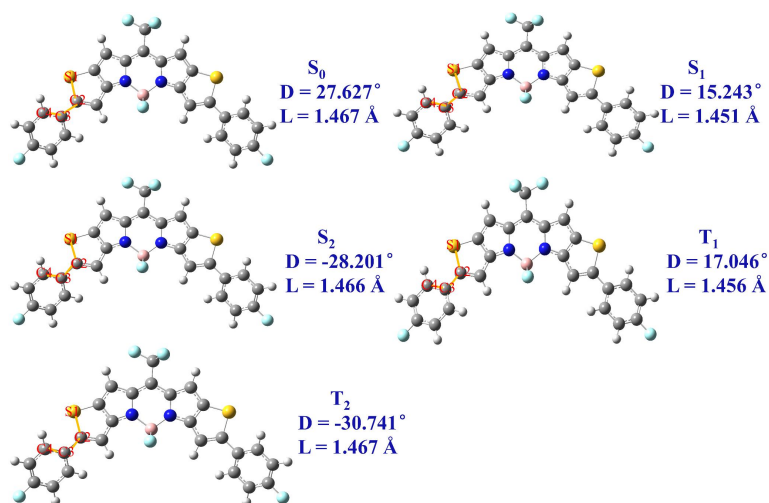

Figure S4. Optimized configuration of SBDPiR698.

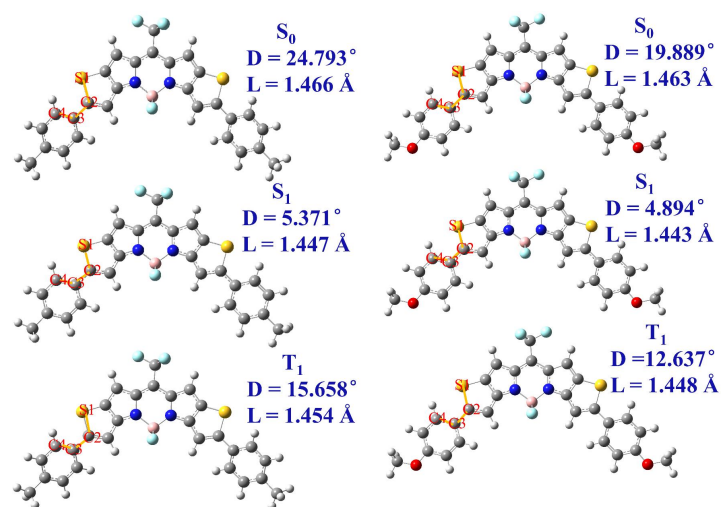

Figure S5. Optimized configuration of SBDPiR710 (left) and SBDPiR731 (right).

**Table S3.** the energy separations for the absorption  $\Delta E_{\text{abs}}(\text{nm})$  and corresponding oscillator strengths of the low-lying electronically excited states for **thiophene-fused-type BODIPY**.

| Compound   | Transition            | Energy (eV) | Maximum absorption wavelength (nm) | Oscillator strengths f | Composition               | CI      |
|------------|-----------------------|-------------|------------------------------------|------------------------|---------------------------|---------|
| PY-BODIPY  | $S_0 \rightarrow S_1$ | 2.5302      | 490.01                             | 1.1021                 | HOMO $\rightarrow$ LUMO   | 0.70142 |
|            | $S_0 \rightarrow S_2$ | 2.9696      | 417.51                             | 0.0054                 | HOMO-1 $\rightarrow$ LUMO | 0.69699 |
|            | $S_0 \rightarrow S_3$ | 3.2014      | 387.28                             | 0.0215                 | HOMO-2 $\rightarrow$ LUMO | 0.70050 |
|            | $S_0 \rightarrow S_4$ | 4.4999      | 275.53                             | 0.4159                 | HOMO-3 $\rightarrow$ LUMO | 0.67401 |
|            | $S_0 \rightarrow S_5$ | 4.5141      | 274.66                             | 0.0037                 | HOMO-4 $\rightarrow$ LUMO | 0.69597 |
|            | $S_0 \rightarrow S_6$ | 4.6636      | 265.86                             | 0.0069                 | HOMO $\rightarrow$ LUMO+1 | 0.68067 |
| PH-BODIPY  | $S_0 \rightarrow S_1$ | 2.5473      | 486.73                             | 1.0915                 | HOMO $\rightarrow$ LUMO   | 0.70069 |
|            | $S_0 \rightarrow S_2$ | 3.0005      | 413.21                             | 0.0075                 | HOMO-1 $\rightarrow$ LUMO | 0.69645 |
|            | $S_0 \rightarrow S_3$ | 3.2350      | 383.25                             | 0.0200                 | HOMO-2 $\rightarrow$ LUMO | 0.70038 |
|            | $S_0 \rightarrow S_4$ | 3.9059      | 317.43                             | 0.0914                 | HOMO-3 $\rightarrow$ LUMO | 0.68348 |
|            | $S_0 \rightarrow S_5$ | 4.3155      | 287.30                             | 0.0021                 | HOMO-4 $\rightarrow$ LUMO | 0.70040 |
|            | $S_0 \rightarrow S_6$ | 4.5691      | 271.35                             | 0.3666                 | HOMO-5 $\rightarrow$ LUMO | 0.67798 |
| MeO-BODIPY | $S_0 \rightarrow S_1$ | 2.5524      | 485.76                             | 1.0770                 | HOMO $\rightarrow$ LUMO   | 0.70047 |
|            | $S_0 \rightarrow S_2$ | 3.0083      | 412.14                             | 0.0080                 | HOMO-1 $\rightarrow$ LUMO | 0.69620 |
|            | $S_0 \rightarrow S_3$ | 3.2275      | 384.15                             | 0.0003                 | HOMO-2 $\rightarrow$ LUMO | 0.67374 |
|            | $S_0 \rightarrow S_4$ | 3.3125      | 374.29                             | 0.1449                 | HOMO-3 $\rightarrow$ LUMO | 0.67034 |
|            | $S_0 \rightarrow S_5$ | 4.3938      | 282.18                             | 0.0052                 | HOMO-4 $\rightarrow$ LUMO | 0.69461 |
|            | $S_0 \rightarrow S_6$ | 4.5669      | 271.48                             | 0.3856                 | HOMO-5 $\rightarrow$ LUMO | 0.68703 |
| DMA-BODIPY | $S_0 \rightarrow S_1$ | 2.5695      | 482.53                             | 1.0465                 | HOMO-1 $\rightarrow$ LUMO | 0.69625 |
|            | $S_0 \rightarrow S_2$ | 2.5850      | 479.64                             | 0.2136                 | HOMO $\rightarrow$ LUMO   | 0.68792 |
|            | $S_0 \rightarrow S_3$ | 3.0356      | 408.43                             | 0.0080                 | HOMO-2 $\rightarrow$ LUMO | 0.69604 |
|            | $S_0 \rightarrow S_4$ | 3.2712      | 379.02                             | 0.0313                 | HOMO-3 $\rightarrow$ LUMO | 0.69975 |
|            | $S_0 \rightarrow S_5$ | 4.2677      | 290.52                             | 0.0004                 | HOMO-4 $\rightarrow$ LUMO | 0.67501 |
|            | $S_0 \rightarrow S_6$ | 4.5458      | 272.74                             | 0.4620                 | HOMO-5 $\rightarrow$ LUMO | 0.67888 |
| SBDPiR690  | $S_0 \rightarrow S_1$ | 2.0646      | 600.51                             | 1.5864                 | HOMO $\rightarrow$ LUMO   | 0.70106 |
|            | $S_0 \rightarrow S_2$ | 2.7635      | 448.64                             | 0.0153                 | HOMO-1 $\rightarrow$ LUMO | 0.68300 |
|            | $S_0 \rightarrow S_3$ | 2.9563      | 419.39                             | 0.0004                 | HOMO-2 $\rightarrow$ LUMO | 0.63940 |
|            | $S_0 \rightarrow S_4$ | 3.6807      | 336.85                             | 0.5620                 | HOMO-3 $\rightarrow$ LUMO | 0.64436 |
|            | $S_0 \rightarrow S_5$ | 4.2258      | 293.40                             | 0.0345                 | HOMO-6 $\rightarrow$ LUMO | 0.64455 |
|            | $S_0 \rightarrow S_6$ | 4.2819      | 289.55                             | 0.3069                 | HOMO $\rightarrow$ LUMO+1 | 0.68006 |
| SBDPiR688  | $S_0 \rightarrow S_1$ | 2.0966      | 591.37                             | 1.5994                 | HOMO $\rightarrow$ LUMO   | 0.70087 |
|            | $S_0 \rightarrow S_2$ | 2.7364      | 453.10                             | 0.0190                 | HOMO-1 $\rightarrow$ LUMO | 0.68713 |



|           |                                |        |        |        |             |         |
|-----------|--------------------------------|--------|--------|--------|-------------|---------|
|           | S <sub>0</sub> →S <sub>3</sub> | 2.9360 | 422.28 | 0.0010 | HOMO-2→LUMO | 0.68098 |
|           | S <sub>0</sub> →S <sub>4</sub> | 3.8198 | 324.58 | 0.6031 | HOMO-3→LUMO | 0.67999 |
|           | S <sub>0</sub> →S <sub>5</sub> | 4.1972 | 295.40 | 0.3109 | HOMO→LUMO+1 | 0.68136 |
|           | S <sub>0</sub> →S <sub>6</sub> | 4.3682 | 283.84 | 0.0608 | HOMO-6→LUMO | 0.60512 |
|           | S <sub>0</sub> →S <sub>1</sub> | 2.0718 | 598.43 | 1.5774 | HOMO→LUMO   | 0.70098 |
|           | S <sub>0</sub> →S <sub>2</sub> | 2.7757 | 446.67 | 0.0161 | HOMO-1→LUMO | 0.68107 |
| SBDPiR698 | S <sub>0</sub> →S <sub>3</sub> | 2.9690 | 417.59 | 0.0005 | HOMO-2→LUMO | 0.61433 |
|           | S <sub>0</sub> →S <sub>4</sub> | 3.6643 | 338.36 | 0.5479 | HOMO-3→LUMO | 0.62137 |
|           | S <sub>0</sub> →S <sub>5</sub> | 4.1944 | 295.60 | 0.0362 | HOMO-4→LUMO | 0.673   |
|           | S <sub>0</sub> →S <sub>6</sub> | 4.3185 | 287.10 | 0.2958 | HOMO→LUMO+1 | 0.68148 |
|           | S <sub>0</sub> →S <sub>1</sub> | 2.0265 | 611.81 | 1.6528 | HOMO→LUMO   | 0.70041 |
|           | S <sub>0</sub> →S <sub>2</sub> | 2.7772 | 446.44 | 0.0139 | HOMO-2→LUMO | 0.64682 |
| SBDPiR710 | S <sub>0</sub> →S <sub>3</sub> | 2.9633 | 418.41 | 0.0031 | HOMO-1→LUMO | 0.50438 |
|           | S <sub>0</sub> →S <sub>4</sub> | 3.5432 | 349.92 | 0.5927 | HOMO-3→LUMO | 0.51194 |
|           | S <sub>0</sub> →S <sub>5</sub> | 4.0664 | 304.90 | 0.0384 | HOMO-4→LUMO | 0.67604 |
|           | S <sub>0</sub> →S <sub>6</sub> | 4.2470 | 291.93 | 0.3390 | HOMO→LUMO+1 | 0.67828 |
|           | S <sub>0</sub> →S <sub>1</sub> | 1.9557 | 633.96 | 1.7424 | HOMO→LUMO   | 0.69895 |
|           | S <sub>0</sub> →S <sub>2</sub> | 2.8053 | 441.97 | 0.0137 | HOMO-2→LUMO | 0.68663 |
|           | S <sub>0</sub> →S <sub>3</sub> | 2.9710 | 417.31 | 0.0293 | HOMO-3→LUMO | 0.56519 |
| SBDPiR731 | S <sub>0</sub> →S <sub>4</sub> | 3.3254 | 372.84 | 0.5498 | HOMO-1→LUMO | 0.56659 |
|           | S <sub>0</sub> →S <sub>5</sub> | 3.8295 | 323.76 | 0.0342 | HOMO-4→LUMO | 0.68065 |
|           | S <sub>0</sub> →S <sub>6</sub> | 4.1562 | 298.31 | 0.3267 | HOMO→LUMO+1 | 0.67749 |

---

**Table S4.** the energy separations for the emission  $\Delta E_{em}(nm)$  and corresponding oscillator strengths of the low-lying electronically excited states for **thiophene-fused-type BODIPY**.

| Compound   | Transition                     | Energy (eV) | Maximum emission wavelength (nm) | Oscillator strengths f | Composition | CI      |
|------------|--------------------------------|-------------|----------------------------------|------------------------|-------------|---------|
| PY-BODIPY  | S <sub>1</sub> →S <sub>0</sub> | 2.1208      | 584.61                           | 1.2599                 | LUMO→HOMO   | 0.70230 |
| PH-BODIPY  | S <sub>1</sub> →S <sub>0</sub> | 2.1568      | 574.84                           | 1.2755                 | LUMO→HOMO   | 0.70196 |
| MeO-BODIPY | S <sub>1</sub> →S <sub>0</sub> | 2.1655      | 572.53                           | 1.2723                 | LUMO→HOMO   | 0.70189 |
| DMA-BODIPY | S <sub>1</sub> →S <sub>0</sub> | 2.1788      | 569.04                           | 1.2640                 | LUMO→HOMO   | 0.70170 |
| SBDPiR690  | S <sub>1</sub> →S <sub>0</sub> | 1.8773      | 660.43                           | 1.6416                 | LUMO→HOMO   | 0.70337 |
| SBDPiR688  | S <sub>1</sub> →S <sub>0</sub> | 1.9034      | 651.38                           | 1.6658                 | LUMO→HOMO   | 0.70344 |
| SBDPiR698  | S <sub>1</sub> →S <sub>0</sub> | 1.8836      | 658.22                           | 1.6341                 | LUMO→HOMO   | 0.70337 |
| SBDPiR710  | S <sub>1</sub> →S <sub>0</sub> | 1.8251      | 679.33                           | 1.7179                 | LUMO→HOMO   | 0.70269 |
| SBDPiR731  | S <sub>1</sub> →S <sub>0</sub> | 1.7684      | 701.12                           | 1.8058                 | LUMO→HOMO   | 0.70158 |

**Table S5.** the energy of HOMO and HOMO-1 orbitals, and the energy difference between HOMO orbital and HOMO-1 orbital for **thiophene-fused-type BODIPY**. The unit of orbital energy is eV.

|                     | PH-BO<br>DIPY | PY-BO<br>DIPY | MeO-B<br>ODIPY | DMA-B<br>ODIPY | SBDP <i>i</i><br>R690 | SBDP <i>i</i><br>R688 | SBDP <i>i</i><br>R698 | SBDP <i>i</i><br>R710 | SBDP <i>i</i><br>R731 |
|---------------------|---------------|---------------|----------------|----------------|-----------------------|-----------------------|-----------------------|-----------------------|-----------------------|
| $E_{\text{HOMO}}$   | -6.783        | -6.737        | -6.729         | -6.673         | -6.640                | -6.830                | -6.667                | -6.330                | -6.363                |
| $E_{\text{HOMO-1}}$ | -7.568        | -7.521        | -7.508         | -6.702         | -7.810                | -7.919                | -7.844                | -7.765                | -7.456                |
| $\Delta E$          | 0.785         | 0.784         | 0.779          | 0.029          | 1.170                 | 1.089                 | 1.197                 | 1.234                 | 1.222                 |

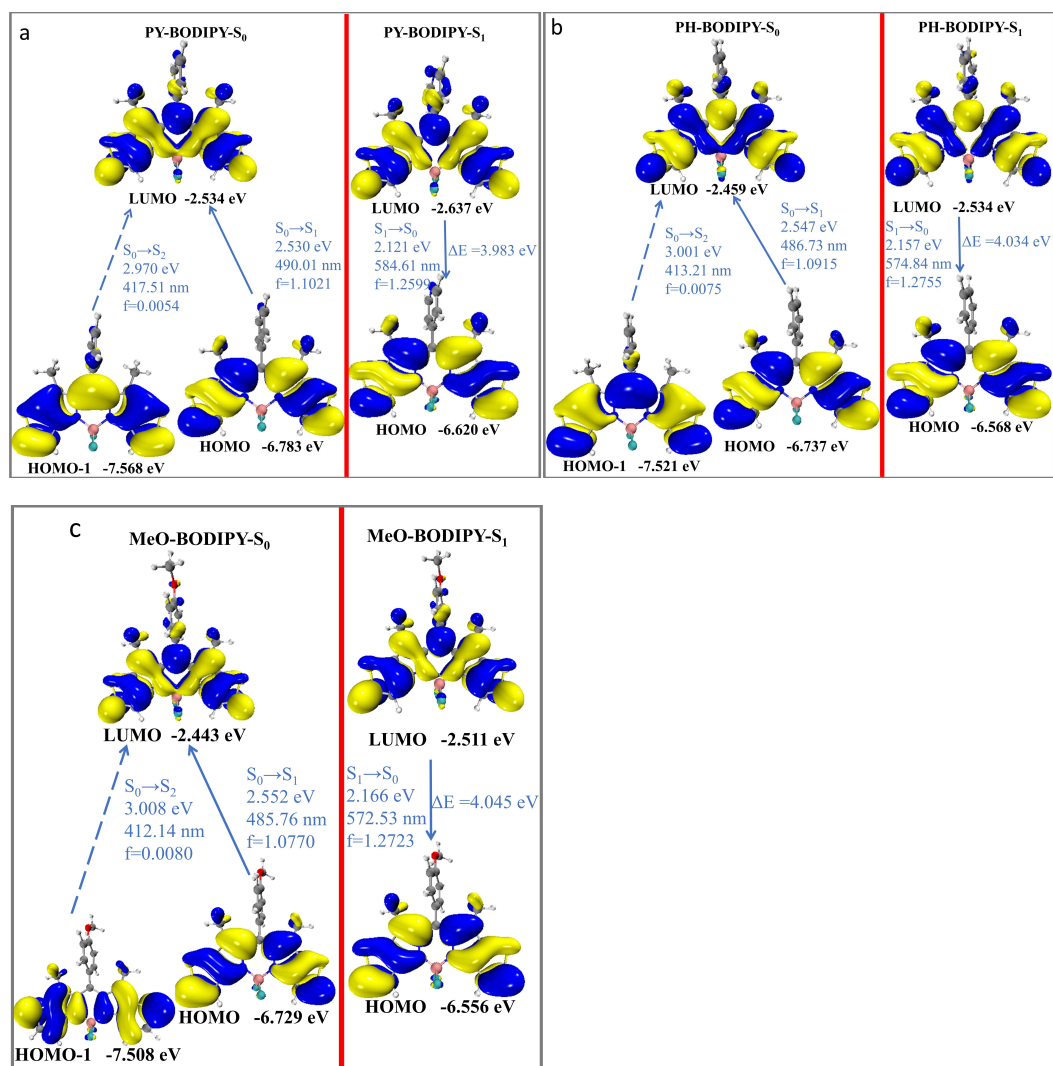

**Figure S6.** Frontier molecular orbitals of  $S_0$  and  $S_1$  states geometries for the **PY-BODIPY** (a), **PH-BODIPY** (b) and **MeO-BODIPY** (c).

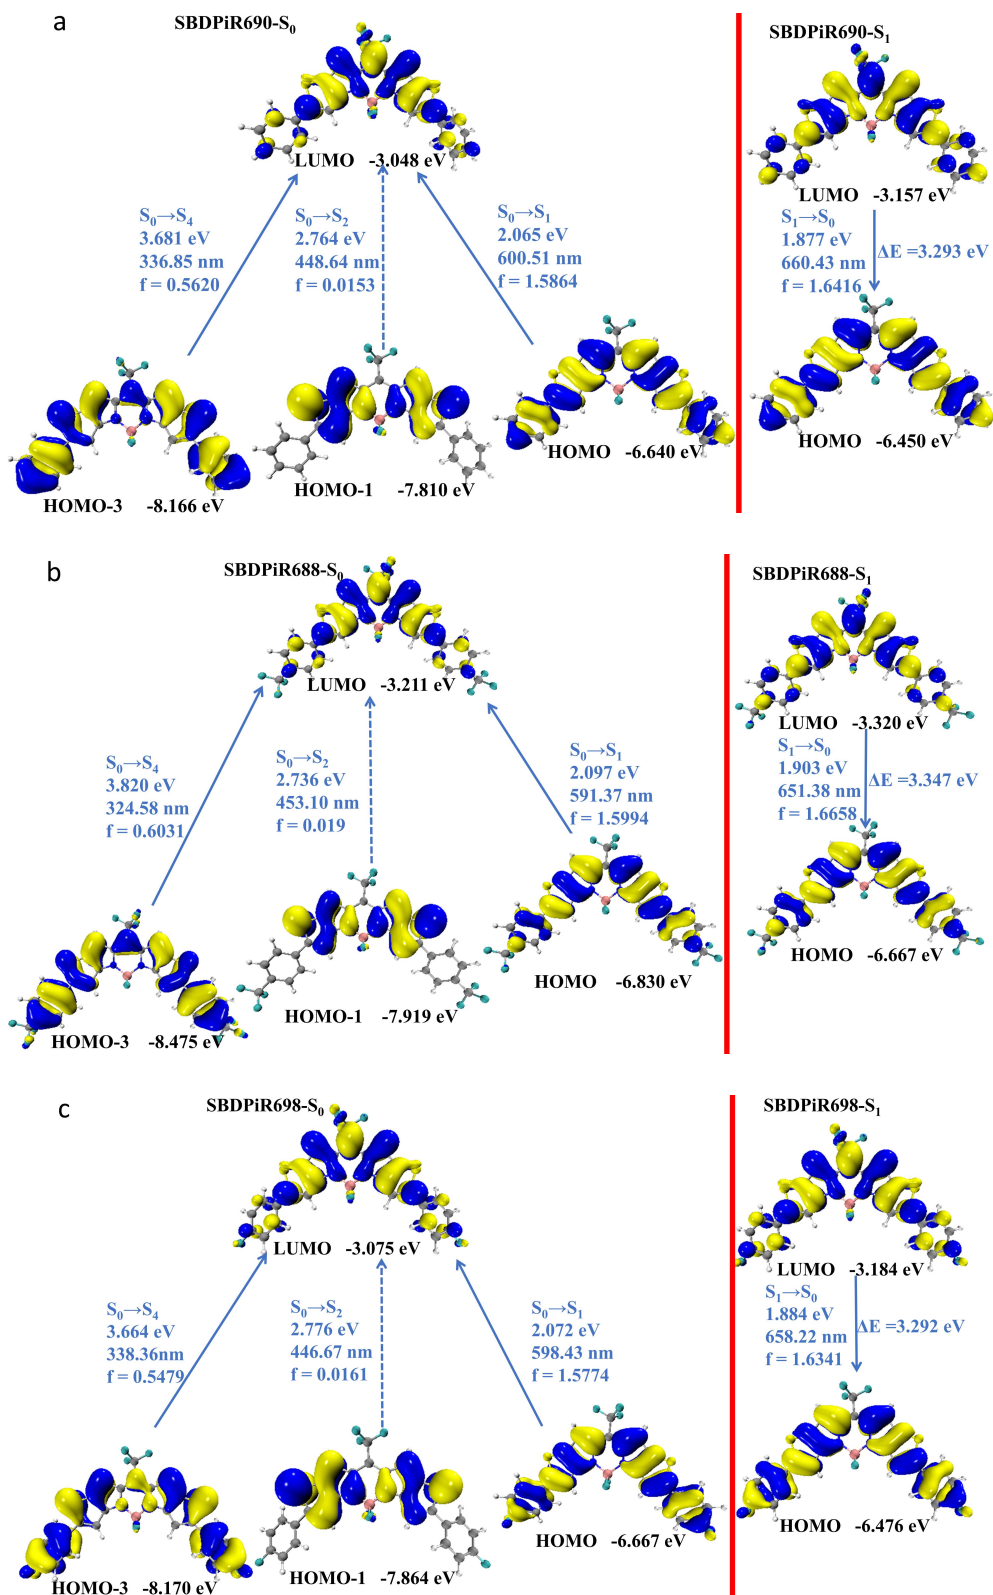

**Figure S7.** Frontier molecular orbitals of S<sub>0</sub> and S<sub>1</sub> states geometries for the SBDPiR690 (a), SBDPiR688 (b), and SBDPiR698 (c).

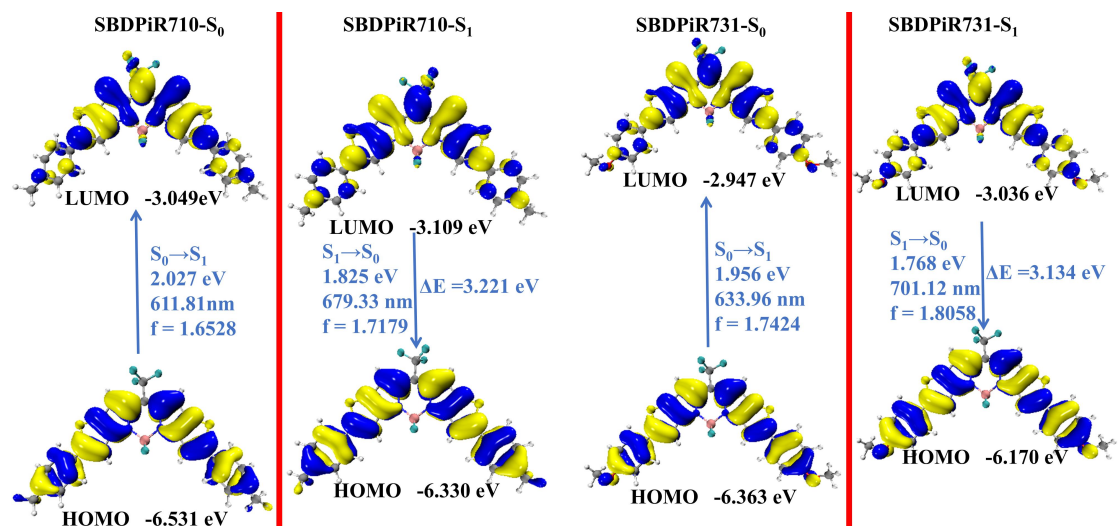

**Figure S8.** Frontier molecular orbitals of S<sub>0</sub> and S<sub>1</sub> states geometries for the **SBDPiR710** (left), **SBDPiR731** (right).

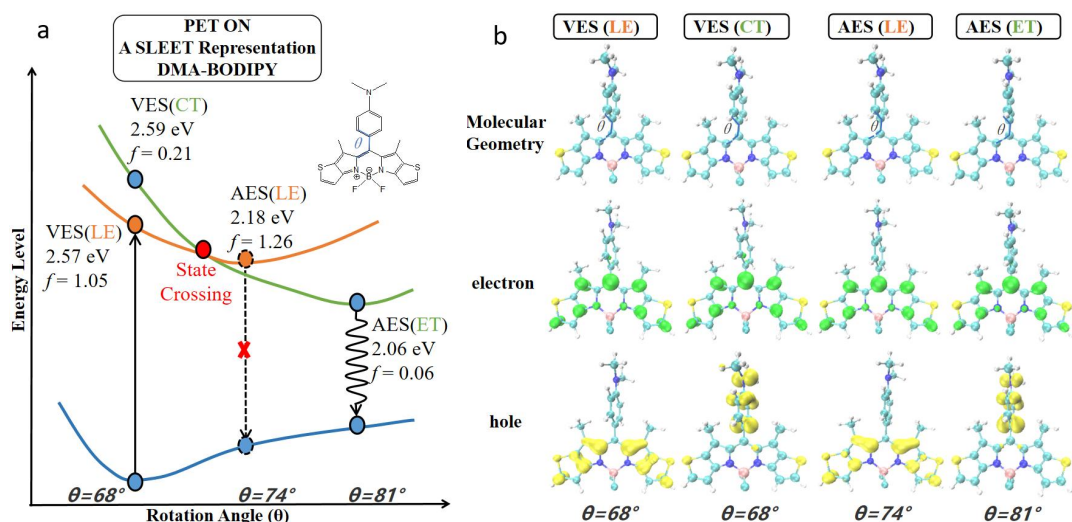

**Figure S9.a.** Schematic illustration of the state-crossing from a locally excited to an electron-transfer state (SLEET) model and calculated excitation/de-excitation energy (as well as oscillator strength *f*) of **DMA-BODIPY** in dichloromethane; the inset shows the molecular structure of **DMA-BODIPY**; note that  $\theta$  values are not drawn to scale for clarification.

**Figure S9.b.** Optimized molecular structures of **DMA-BODIPY** in the ground and excited states, as well as the corresponding electron and hole distributions in dichloromethane. VES and AES denoted vertically excited state and adiabatic excited state, respectively.

**Table S6.** Contribution of different fragments of **PY-BODIPY** to important frontier molecular orbitals in  $S_0$ ,  $S_1$ , and  $T_2$  states.

| Compound                 | MO     | E (au)  | Main Contribution %    |                   |        |
|--------------------------|--------|---------|------------------------|-------------------|--------|
|                          |        |         | thiophene-fused BODIPY | Meso substitution | Atom S |
| $S_0$ State<br>PY-BODIPY | HOMO-3 | -0.3248 | 94.928                 | 5.090             | 4.422  |
|                          | HOMO-2 | -0.2832 | 99.619                 | 0.379             | 35.764 |
|                          | HOMO-1 | -0.2781 | 99.665                 | 0.337             | 33.686 |
|                          | HOMO   | -0.2493 | 99.295                 | 0.709             | 4.000  |
|                          | LUMO   | -0.0931 | 95.008                 | 4.993             | 3.229  |
|                          | LUMO+1 | -0.0135 | 15.847                 | 84.146            | 0.321  |
|                          | LUMO+2 | -0.0010 | 39.263                 | 60.389            | 4.159  |
|                          | LUMO+3 | 0.0034  | 71.313                 | 23.749            | 9.858  |
|                          | HOMO-3 | -0.3224 | 90.641                 | 9.374             | 5.296  |
| $S_1$ State<br>PY-BODIPY | HOMO-2 | -0.2841 | 99.056                 | 0.941             | 33.078 |
|                          | HOMO-1 | -0.2827 | 99.607                 | 0.394             | 31.830 |
|                          | HOMO   | -0.2433 | 99.292                 | 0.712             | 5.283  |
|                          | LUMO   | -0.0969 | 93.527                 | 6.476             | 3.719  |
|                          | LUMO+1 | -0.0130 | 17.599                 | 82.434            | 0.620  |
|                          | LUMO+2 | -0.0021 | 47.563                 | 51.792            | 5.297  |
|                          | LUMO+3 | 0.0038  | 74.888                 | 20.770            | 10.638 |
|                          | HOMO-3 | -0.3229 | 92.173                 | 7.838             | 4.412  |
|                          | HOMO-2 | -0.2811 | 99.742                 | 0.256             | 34.238 |
| $T_2$ State<br>PY-BODIPY | HOMO-1 | -0.2715 | 99.838                 | 0.160             | 31.462 |
|                          | HOMO   | -0.2558 | 99.245                 | 0.757             | 3.854  |
|                          | LUMO   | -0.0991 | 93.384                 | 6.614             | 2.738  |
|                          | LUMO+1 | -0.0136 | 16.627                 | 83.411            | 0.456  |
|                          | LUMO+2 | -0.0015 | 37.776                 | 61.369            | 3.826  |
|                          | LUMO+3 | 0.0041  | 69.743                 | 25.946            | 10.008 |

**Table S7.** Contribution of different fragments of **PH-BODIPY** to important frontier molecular orbitals in  $S_0$ ,  $S_1$ , and  $T_2$  states.

| Compound                 | MO                       | E (au)  | Main Contribution %    |                   |        |
|--------------------------|--------------------------|---------|------------------------|-------------------|--------|
|                          |                          |         | thiophene-fused BODIPY | Meso substitution | Atom S |
| $S_0$ State<br>PH-BODIPY | HOMO-3                   | -0.3102 | 23.901                 | 74.305            | 0.942  |
|                          | HOMO-2                   | -0.2815 | 99.536                 | 0.460             | 35.357 |
|                          | HOMO-1                   | -0.2764 | 99.567                 | 0.434             | 33.338 |
|                          | HOMO                     | -0.2476 | 99.232                 | 0.771             | 3.957  |
|                          | LUMO                     | -0.0904 | 94.688                 | 5.271             | 3.222  |
|                          | LUMO+1                   | 0.0027  | 58.564                 | 38.157            | 7.228  |
|                          | LUMO+2                   | 0.0052  | 69.569                 | 26.777            | 9.622  |
|                          | LUMO+3                   | 0.00532 | 24.297                 | 48.469            | 2.337  |
|                          | $S_1$ State<br>PH-BODIPY | HOMO-3  | -0.3093                | 29.205            | 70.802 |
| HOMO-2                   |                          | -0.2823 | 98.687                 | 1.310             | 32.583 |
| HOMO-1                   |                          | -0.2807 | 99.356                 | 0.646             | 31.557 |
| HOMO                     |                          | -0.2414 | 99.312                 | 0.693             | 5.208  |
| LUMO                     |                          | -0.0931 | 94.440                 | 5.564             | 3.789  |
| LUMO+1                   |                          | 0.0015  | 62.850                 | 35.935            | 7.788  |
| LUMO+2                   |                          | 0.0048  | 24.268                 | 75.542            | 2.291  |
| LUMO+3                   |                          | 0.0048  | 75.851                 | 20.214            | 10.547 |
| $T_2$ State<br>PH-BODIPY |                          | HOMO-3  | -0.3104                | 30.114            | 68.894 |
|                          | HOMO-2                   | -0.2794 | 99.714                 | 0.283             | 33.958 |
|                          | HOMO-1                   | -0.2698 | 99.779                 | 0.220             | 31.187 |
|                          | HOMO                     | -0.2538 | 99.229                 | 0.774             | 3.820  |
|                          | LUMO                     | -0.0953 | 94.001                 | 5.998             | 2.785  |
|                          | LUMO+1                   | 0.0023  | 56.700                 | 40.797            | 6.928  |
|                          | LUMO+2                   | 0.0047  | 22.986                 | 76.843            | 1.968  |
|                          | LUMO+3                   | 0.0057  | 68.870                 | 28.421            | 9.700  |

**Table S8.** Contribution of different fragments of **MeO-BODIPY** to important frontier molecular orbitals in  $S_0$ ,  $S_1$ , and  $T_2$  states.

| Compound                  | MO                        | E (au)  | Main Contribution %    |                   |        |
|---------------------------|---------------------------|---------|------------------------|-------------------|--------|
|                           |                           |         | thiophene-fused BODIPY | Meso substitution | Atom S |
| $S_0$ State<br>MeO-BODIPY | HOMO-3                    | -0.2824 | 48.553                 | 49.057            | 16.245 |
|                           | HOMO-2                    | -0.2801 | 62.367                 | 35.949            | 19.395 |
|                           | HOMO-1                    | -0.2759 | 99.590                 | 0.393             | 33.246 |
|                           | HOMO                      | -0.2473 | 99.170                 | 0.811             | 3.929  |
|                           | LUMO                      | -0.0898 | 93.977                 | 5.959             | 3.180  |
|                           | LUMO+1                    | 0.0020  | 52.706                 | 43.630            | 6.143  |
|                           | LUMO+2                    | 0.0057  | 68.650                 | 26.973            | 9.715  |
|                           | LUMO+3                    | 0.0124  | 64.929                 | 32.469            | 9.715  |
|                           | $S_1$ State<br>MeO-BODIPY | HOMO-3  | -0.2841                | 57.743            | 42.249 |
| HOMO-2                    |                           | -0.2803 | 95.869                 | 4.117             | 30.236 |
| HOMO-1                    |                           | -0.2798 | 56.051                 | 43.942            | 15.453 |
| HOMO                      |                           | -0.2409 | 99.291                 | 0.693             | 5.166  |
| LUMO                      |                           | -0.0923 | 94.281                 | 5.703             | 3.780  |
| LUMO+1                    |                           | 0.0011  | 57.260                 | 41.574            | 6.857  |
| LUMO+2                    |                           | 0.0050  | 75.377                 | 20.495            | 10.816 |
| LUMO+3                    |                           | 0.0116  | 59.347                 | 39.486            | 11.890 |
| $T_2$ State<br>MeO-BODIPY |                           | HOMO-3  | -0.2831                | 11.107            | 88.889 |
|                           | HOMO-2                    | -0.2789 | 99.231                 | 0.758             | 33.627 |
|                           | HOMO-1                    | -0.2694 | 99.790                 | 0.208             | 31.132 |
|                           | HOMO                      | -0.2533 | 99.246                 | 0.746             | 3.804  |
|                           | LUMO                      | -0.0945 | 93.946                 | 6.045             | 2.788  |
|                           | LUMO+1                    | 0.0018  | 50.812                 | 47.226            | 5.905  |
|                           | LUMO+2                    | 0.0056  | 67.579                 | 29.037            | 9.681  |
|                           | LUMO+3                    | 0.0120  | 61.602                 | 37.221            | 12.184 |



**Table S9.** Contribution of different fragments of **DMA-BODIPY** to important frontier molecular orbitals in  $S_0$ ,  $S_1$ , and  $T_2$  states.

| Compound                  | MO                        | E (au)  | Main Contribution %    |                   |        |
|---------------------------|---------------------------|---------|------------------------|-------------------|--------|
|                           |                           |         | thiophene-fused BODIPY | Meso substitution | Atom S |
| $S_0$ State<br>DMA-BODIPY | HOMO-3                    | -0.2797 | 99.392                 | 0.607             | 17.470 |
|                           | HOMO-2                    | -0.2746 | 99.699                 | 0.300             | 16.560 |
|                           | HOMO-1                    | -0.2463 | 99.019                 | 0.980             | 1.989  |
|                           | HOMO                      | -0.2452 | 8.476                  | 91.517            | 0.052  |
|                           | LUMO                      | -0.0879 | 92.262                 | 7.736             | 1.556  |
|                           | LUMO+1                    | 0.0035  | 63.526                 | 32.449            | 4.106  |
|                           | LUMO+2                    | 0.0086  | 77.154                 | 21.714            | 5.425  |
|                           | LUMO+3                    | 0.0148  | 75.128                 | 22.466            | 7.970  |
|                           | $S_1$ State<br>DMA-BODIPY | HOMO-3  | -0.2810                | 98.779            | 0.902  |
| HOMO-2                    |                           | -0.2791 | 99.327                 | 0.237             | 31.366 |
| HOMO-1                    |                           | -0.2471 | 7.081                  | 70.031            | 0.125  |
| HOMO                      |                           | -0.2399 | 99.302                 | 0.554             | 5.151  |
| LUMO                      |                           | -0.0906 | 93.870                 | 4.527             | 3.773  |
| LUMO+1                    |                           | 0.0032  | 67.150                 | 19.927            | 8.564  |
| LUMO+2                    |                           | 0.0061  | 79.802                 | 12.501            | 11.451 |
| LUMO+3                    |                           | 0.0139  | 68.815                 | 23.657            | 16.561 |
| $T_2$ State<br>DMA-BODIPY |                           | HOMO-3  | -0.2769                | 97.652            | 2.341  |
|                           | HOMO-2                    | -0.2730 | 99.850                 | 0.139             | 30.705 |
|                           | HOMO-1                    | -0.2467 | 98.887                 | 1.091             | 4.905  |
|                           | HOMO                      | -0.2413 | 24.161                 | 75.829            | 0.833  |
|                           | LUMO                      | -0.0891 | 79.450                 | 20.531            | 2.483  |
|                           | LUMO+1                    | 0.0031  | 57.360                 | 39.381            | 6.603  |
|                           | LUMO+2                    | 0.0126  | 94.276                 | 5.324             | 13.615 |
|                           | LUMO+3                    | 0.0163  | 54.064                 | 42.558            | 5.193  |

**Table S10.** Contribution of different fragments of **SBDPiR690** to important frontier molecular orbitals in  $S_0$ ,  $S_1$ , and  $T_2$  states.

| Compound                          | MO     | E (au)  | Main Contribution %       |                        |                           |        |
|-----------------------------------|--------|---------|---------------------------|------------------------|---------------------------|--------|
|                                   |        |         | thiophene-fused<br>BODIPY | phenyl<br>substitution | -CF <sub>3</sub><br>Group | Atom S |
| S <sub>0</sub> State<br>SBDPiR690 | HOMO-3 | -0.3001 | 54.760                    | 44.744                 | 0.488                     | 19.754 |
|                                   | HOMO-2 | -0.2902 | 82.925                    | 16.347                 | 0.721                     | 22.708 |
|                                   | HOMO-1 | -0.2872 | 98.311                    | 1.607                  | 0.082                     | 37.717 |
|                                   | HOMO   | -0.2437 | 80.302                    | 19.186                 | 0.511                     | 2.815  |
|                                   | LUMO   | -0.1119 | 85.435                    | 10.361                 | 4.201                     | 2.784  |
|                                   | LUMO+1 | -0.0274 | 54.450                    | 45.299                 | 0.186                     | 7.976  |
|                                   | LUMO+2 | -0.0122 | 50.806                    | 47.920                 | 1.047                     | 8.125  |
|                                   | LUMO+3 | 0.0029  | 66.162                    | 23.564                 | 5.161                     | 15.160 |
| S <sub>1</sub> State<br>SBDPiR690 | HOMO-3 | -0.2987 | 69.609                    | 30.124                 | 0.268                     | 29.973 |
|                                   | HOMO-2 | -0.2894 | 87.294                    | 12.215                 | 0.490                     | 28.159 |
|                                   | HOMO-1 | -0.2891 | 80.316                    | 18.717                 | 0.964                     | 20.618 |
|                                   | HOMO   | -0.2372 | 77.940                    | 21.565                 | 0.496                     | 2.796  |
|                                   | LUMO   | -0.1161 | 82.387                    | 13.354                 | 4.257                     | 3.148  |
|                                   | LUMO+1 | -0.0343 | 55.514                    | 44.234                 | 0.205                     | 7.944  |
|                                   | LUMO+2 | -0.0167 | 53.870                    | 44.561                 | 1.392                     | 7.663  |
|                                   | LUMO+3 | 0.0037  | 72.954                    | 15.331                 | 5.500                     | 15.941 |
| T <sub>2</sub> State<br>SBDPiR690 | HOMO-3 | -0.2985 | 46.225                    | 52.982                 | 0.487                     | 10.133 |
|                                   | HOMO-2 | -0.2897 | 92.579                    | 6.960                  | 0.455                     | 30.767 |
|                                   | HOMO-1 | -0.2827 | 98.680                    | 1.242                  | 0.076                     | 34.353 |
|                                   | HOMO   | -0.2496 | 78.606                    | 20.932                 | 0.463                     | 3.188  |
|                                   | LUMO   | -0.1189 | 86.229                    | 8.986                  | 4.782                     | 2.477  |
|                                   | LUMO+1 | -0.0268 | 53.592                    | 46.179                 | 0.170                     | 8.123  |
|                                   | LUMO+2 | -0.0140 | 49.620                    | 49.228                 | 0.958                     | 8.544  |
| LUMO+3                            | 0.0028 | 64.882  | 24.898                    | 5.088                  | 14.551                    |        |

**Table S11.** Contribution of different fragments of **SBDPiR688** to important frontier molecular orbitals in  $S_0$ ,  $S_1$ , and  $T_2$  states.

| Compound                 | MO                       | E (au)  | Main Contribution %           |                        |                           |           |
|--------------------------|--------------------------|---------|-------------------------------|------------------------|---------------------------|-----------|
|                          |                          |         | thiophene-f<br>used<br>BODIPY | phenyl<br>substitution | -CF <sub>3</sub><br>Group | Atom<br>S |
| $S_0$ State<br>SBDPiR688 | HOMO-3                   | -0.3115 | 51.195                        | 47.924                 | 0.874                     | 10.394    |
|                          | HOMO-2                   | -0.2957 | 93.985                        | 5.517                  | 0.494                     | 32.079    |
|                          | HOMO-1                   | -0.2914 | 98.684                        | 1.243                  | 0.073                     | 37.644    |
|                          | HOMO                     | -0.2512 | 83.387                        | 16.078                 | 0.534                     | 2.932     |
|                          | LUMO                     | -0.1175 | 84.677                        | 11.192                 | 4.126                     | 2.850     |
|                          | LUMO+1                   | -0.0398 | 45.488                        | 54.314                 | 0.154                     | 6.545     |
|                          | LUMO+2                   | -0.0252 | 41.079                        | 57.794                 | 1.020                     | 5.689     |
|                          | LUMO+3                   | -0.0038 | 23.704                        | 74.165                 | 0.964                     | 7.685     |
|                          | $S_1$ State<br>SBDPiR688 | HOMO-3  | -0.3085                       | 58.669                 | 40.573                    | 0.758     |
| HOMO-2                   |                          | -0.2962 | 88.443                        | 10.542                 | 1.009                     | 24.235    |
| HOMO-1                   |                          | -0.2941 | 97.603                        | 2.322                  | 0.076                     | 37.153    |
| HOMO                     |                          | -0.2450 | 80.709                        | 18.773                 | 0.518                     | 3.030     |
| LUMO                     |                          | -0.1224 | 81.446                        | 14.415                 | 4.136                     | 3.284     |
| LUMO+1                   |                          | -0.0464 | 48.641                        | 51.141                 | 0.182                     | 6.728     |
| LUMO+2                   |                          | -0.0288 | 46.472                        | 52.024                 | 1.408                     | 5.605     |
| LUMO+3                   |                          | -0.0019 | 21.442                        | 76.343                 | 0.961                     | 6.204     |
| $T_2$ State<br>SBDPiR688 |                          | HOMO-3  | -0.3100                       | 49.642                 | 49.270                    | 1.080     |
|                          | HOMO-2                   | -0.2945 | 96.955                        | 2.714                  | 0.326                     | 34.858    |
|                          | HOMO-1                   | -0.2870 | 98.852                        | 1.072                  | 0.074                     | 34.292    |
|                          | HOMO                     | -0.2567 | 81.690                        | 17.824                 | 0.486                     | 3.258     |
|                          | LUMO                     | -0.1244 | 85.360                        | 9.954                  | 4.681                     | 2.526     |
|                          | LUMO+1                   | -0.0405 | 44.756                        | 55.057                 | 0.141                     | 6.648     |
|                          | LUMO+2                   | -0.0281 | 40.618                        | 58.316                 | 0.966                     | 6.133     |
|                          | LUMO+3                   | -0.0039 | 20.394                        | 77.796                 | 0.790                     | 6.472     |

**Table S12.** Contribution of different fragments of **SBDPiR698** to important frontier molecular orbitals in  $S_0$ ,  $S_1$ , and  $T_2$  states.

| Compound                 | MO     | E (au)  | Main Contribution %    |                     |                        |        |
|--------------------------|--------|---------|------------------------|---------------------|------------------------|--------|
|                          |        |         | thiophene-fused BODIPY | phenyl substitution | -CF <sub>3</sub> Group | Atom S |
| $S_0$ State<br>SBDPiR698 | HOMO-3 | -0.3002 | 58.141                 | 41.480              | 0.371                  | 23.137 |
|                          | HOMO-2 | -0.2912 | 77.821                 | 21.392              | 0.779                  | 19.307 |
|                          | HOMO-1 | -0.2887 | 98.439                 | 1.474               | 0.088                  | 37.545 |
|                          | HOMO   | -0.2448 | 79.770                 | 19.720              | 0.508                  | 2.797  |
|                          | LUMO   | -0.1128 | 85.770                 | 10.007              | 4.218                  | 2.781  |
|                          | LUMO+1 | -0.0268 | 56.310                 | 43.429              | 0.191                  | 8.349  |
|                          | LUMO+2 | -0.0117 | 52.412                 | 46.286              | 1.029                  | 8.748  |
|                          | LUMO+3 | -0.0018 | 26.389                 | 70.983              | 1.232                  | 8.240  |
| $S_1$ State<br>SBDPiR698 | HOMO-3 | -0.2994 | 74.863                 | 24.964              | 0.173                  | 33.260 |
|                          | HOMO-2 | -0.2907 | 96.680                 | 3.243               | 0.077                  | 37.040 |
|                          | HOMO-1 | -0.2898 | 65.157                 | 33.410              | 1.426                  | 8.518  |
|                          | HOMO   | -0.2380 | 77.371                 | 22.137              | 0.492                  | 2.758  |
|                          | LUMO   | -0.1168 | 82.718                 | 12.997              | 4.283                  | 3.131  |
|                          | LUMO+1 | -0.0338 | 56.882                 | 42.856              | 0.208                  | 8.229  |
|                          | LUMO+2 | -0.0165 | 54.955                 | 43.472              | 1.362                  | 8.074  |
|                          | LUMO+3 | -0.0001 | 24.576                 | 72.707              | 1.204                  | 7.061  |
| $T_2$ State<br>SBDPiR698 | HOMO-3 | -0.2985 | 46.430                 | 52.885              | 0.680                  | 11.936 |
|                          | HOMO-2 | -0.2911 | 90.345                 | 9.145               | 0.504                  | 28.852 |
|                          | HOMO-1 | -0.2842 | 98.788                 | 1.134               | 0.077                  | 34.203 |
|                          | HOMO   | -0.2509 | 78.095                 | 21.446              | 0.459                  | 3.178  |
|                          | LUMO   | -0.1200 | 86.558                 | 8.635               | 4.803                  | 2.474  |
|                          | LUMO+1 | -0.0260 | 55.533                 | 44.227              | 0.174                  | 8.518  |
|                          | LUMO+2 | -0.0134 | 51.269                 | 47.557              | 0.938                  | 9.162  |
|                          | LUMO+3 | -0.0020 | 23.548                 | 74.146              | 1.042                  | 7.228  |

**Table S13.** Contribution of different fragments of **SBDPiR710** to important frontier molecular orbitals in  $S_0$ ,  $S_1$ , and  $T_2$  states.

| Compound                 | MO     | E (au)  | Main Contribution %    |                     |                        |        |
|--------------------------|--------|---------|------------------------|---------------------|------------------------|--------|
|                          |        |         | thiophene-fused BODIPY | phenyl substitution | -CF <sub>3</sub> Group | Atom S |
| $S_0$ State<br>SBDPiR710 | HOMO-3 | -0.2945 | 75.659                 | 24.199              | 0.136                  | 34.677 |
|                          | HOMO-2 | -0.2861 | 89.957                 | 9.841               | 0.200                  | 32.272 |
|                          | HOMO-1 | -0.2854 | 63.777                 | 35.387              | 0.824                  | 12.909 |
|                          | HOMO   | -0.2400 | 76.851                 | 22.660              | 0.486                  | 2.700  |
|                          | LUMO   | -0.1103 | 85.146                 | 10.655              | 4.194                  | 2.752  |
|                          | LUMO+1 | -0.0252 | 55.146                 | 44.594              | 0.190                  | 8.096  |
|                          | LUMO+2 | -0.0102 | 51.270                 | 47.423              | 1.036                  | 8.335  |
|                          | LUMO+3 | 0.0036  | 66.250                 | 23.350              | 5.088                  | 14.820 |
| $S_1$ State<br>SBDPiR710 | HOMO-3 | -0.2947 | 85.104                 | 14.791              | 0.101                  | 38.533 |
|                          | HOMO-2 | -0.2877 | 96.146                 | 3.782               | 0.070                  | 37.623 |
|                          | HOMO-1 | -0.2828 | 49.658                 | 48.873              | 1.453                  | 2.249  |
|                          | HOMO   | -0.2326 | 74.233                 | 25.293              | 0.469                  | 2.588  |
|                          | LUMO   | -0.1143 | 81.588                 | 14.175              | 4.232                  | 3.060  |
|                          | LUMO+1 | -0.0328 | 55.794                 | 43.943              | 0.203                  | 7.916  |
|                          | LUMO+2 | -0.0153 | 54.365                 | 44.034              | 1.394                  | 7.659  |
|                          | LUMO+3 | 0.0046  | 75.226                 | 12.314              | 5.652                  | 16.022 |
| $T_2$ State<br>SBDPiR710 | HOMO-3 | -0.2928 | 67.290                 | 32.447              | 0.259                  | 27.719 |
|                          | HOMO-2 | -0.2867 | 64.978                 | 34.185              | 0.829                  | 13.339 |
|                          | HOMO-1 | -0.2815 | 98.299                 | 1.616               | 0.084                  | 33.999 |
|                          | HOMO   | -0.2460 | 74.918                 | 24.644              | 0.437                  | 3.089  |
|                          | LUMO   | -0.1173 | 86.113                 | 9.096               | 4.788                  | 2.458  |
|                          | LUMO+1 | -0.0240 | 54.320                 | 45.444              | 0.173                  | 8.290  |
|                          | LUMO+2 | -0.0115 | 49.937                 | 48.897              | 0.934                  | 8.812  |
|                          | LUMO+3 | 0.0035  | 64.566                 | 25.242              | 4.976                  | 14.221 |

**Table S14.** Contribution of different fragments of **SBDPiR731** to important frontier molecular orbitals in  $S_0$ ,  $S_1$ , and  $T_2$  states.

| Compound                 | MO      | E (au)  | Main Contribution %       |                        |                           |           |
|--------------------------|---------|---------|---------------------------|------------------------|---------------------------|-----------|
|                          |         |         | thiophene-fused<br>BODIPY | phenyl<br>substitution | -CF <sub>3</sub><br>Group | Atom<br>S |
| $S_0$ State<br>SBDPiR731 | HOMO-3  | -0.2913 | 93.183                    | 6.670                  | 0.145                     | 40.346    |
|                          | HOMO-2  | -0.2843 | 97.840                    | 2.079                  | 0.081                     | 38.185    |
|                          | HOMO-1  | -0.2740 | 31.165                    | 67.991                 | 0.834                     | 0.724     |
|                          | HOMO    | -0.2338 | 69.996                    | 29.563                 | 0.438                     | 2.477     |
|                          | LUMO    | -0.1083 | 84.361                    | 11.467                 | 4.167                     | 2.674     |
|                          | LUMO+1  | -0.0225 | 58.395                    | 41.328                 | 0.201                     | 8.493     |
|                          | LUMO+2  | -0.0069 | 56.257                    | 42.325                 | 1.088                     | 9.375     |
| $S_1$ State<br>SBDPiR731 | LUMO+3  | 0.0041  | 66.196                    | 23.229                 | 5.194                     | 15.256    |
|                          | HOMO-3  | -0.2920 | 93.513                    | 6.262                  | 0.221                     | 39.439    |
|                          | HOMO-2  | -0.2856 | 93.593                    | 6.300                  | 0.105                     | 37.306    |
|                          | HOMO-1  | -0.2716 | 34.830                    | 63.960                 | 1.195                     | 0.638     |
|                          | HOMO    | -0.2267 | 68.690                    | 30.876                 | 0.429                     | 2.342     |
|                          | LUMO    | -0.1116 | 81.092                    | 14.658                 | 4.247                     | 2.917     |
|                          | LUMO+1  | -0.0284 | 58.203                    | 41.521                 | 0.213                     | 8.308     |
| $T_2$ State<br>SBDPiR731 | LUMO+2  | -0.0111 | 57.857                    | 40.485                 | 1.398                     | 8.629     |
|                          | LUMO+3  | 0.0050  | 74.186                    | 13.825                 | 5.393                     | 16.723    |
|                          | HOMO-3  | -0.2888 | 94.637                    | 5.200                  | 0.159                     | 38.645    |
|                          | HOMO-2  | -0.2808 | 97.721                    | 2.198                  | 0.079                     | 34.589    |
|                          | HOMO-1  | -0.2759 | 29.320                    | 69.897                 | 0.768                     | 1.083     |
|                          | HOMO    | -0.2411 | 67.892                    | 31.714                 | 0.390                     | 2.895     |
|                          | LUMO    | -0.1157 | 85.977                    | 9.220                  | 4.799                     | 2.428     |
| LUMO+1                   | -0.0196 | 58.137  | 41.595                    | 0.187                  | 8.998                     |           |
| LUMO+2                   | -0.0071 | 54.216  | 44.540                    | 0.932                  | 10.264                    |           |
| LUMO+3                   | 0.0035  | 59.519  | 31.393                    | 4.447                  | 13.874                    |           |

**Table S15.** Electron excitation characteristics of **PY-BODIPY**, **PH-BODIPY**, **MeO-BODIPY** in different transition states.

[a]  $S_r$ : the geometric mean function of the overlap between electrons and hole distributions. [b]  $D_{HE}$ : the distance of centroid between the hole and the electron. [c]  $\Delta\sigma$ : the difference in the overall spatial distribution breadth of electrons and holes. [d]  $H_{CT}$ : mean ductility of holes and electrons in the CT direction. [e]  $H$ : the overall average distribution breadth of electrons and holes. [f]  $t$ : the separated degree of holes and electrons. The  $t > 0$  implies that the holes and electrons are sufficiently separated by CT, and the  $t < 0$  can be considered that the holes and electrons are not significantly separated in the CT direction. The small  $D_{HE}$ , large  $S_r$  and negative  $t$  suggest that the electron excited character belongs to local excite (LE). The proportion of LE state (Figure S10, S11, S12) also illustrates this fact.

| Transition Process              | PY-BODIPY             |                       |                       | PH-BODIPY             |                       |                       |
|---------------------------------|-----------------------|-----------------------|-----------------------|-----------------------|-----------------------|-----------------------|
|                                 | $S_0 \rightarrow S_1$ | $S_1 \rightarrow T_1$ | $S_1 \rightarrow T_2$ | $S_0 \rightarrow S_1$ | $S_1 \rightarrow T_1$ | $S_1 \rightarrow T_2$ |
| $S_r^{[a]}/a.u.$                | 0.759                 | --                    | --                    | 0.764                 | --                    | --                    |
| $D_{HE}^{[b]}/\text{\AA}$       | 0.399                 | 0.665                 | 0.163                 | 0.389                 | 0.686                 | 0.171                 |
| $\Delta\sigma^{[c]}/\text{\AA}$ | -0.011                | --                    | --                    | 0.009                 | --                    | --                    |
| $H_{CT}^{[d]}/\text{\AA}$       | 1.528                 | 1.702                 | 1.449                 | 1.530                 | 1.750                 | 1.427                 |
| $H^{[e]}/\text{\AA}$            | 3.283                 | 2.816                 | 3.719                 | 3.270                 | 2.856                 | 3.720                 |
| $t^{[f]}/\text{\AA}$            | -1.129                | -1.037                | -1.286                | -1.141                | -1.063                | -1.256                |
| LE/%                            | 97.426                | 97.146                | 97.183                | 97.198                | 97.695                | 96.458                |
| CT/%                            | 2.574                 | 2.854                 | 2.817                 | 2.802                 | 2.305                 | 3.542                 |

  

| MeO-BODIPY                |                       |                       |                       |
|---------------------------|-----------------------|-----------------------|-----------------------|
| Transition Process        | $S_0 \rightarrow S_1$ | $S_1 \rightarrow T_1$ | $S_1 \rightarrow T_2$ |
| $S_r/a.u.$                | 0.755                 | --                    | --                    |
| $D_{HE}/\text{\AA}$       | 0.434                 | 0.782                 | 0.185                 |
| $\Delta\sigma/\text{\AA}$ | 0.018                 | --                    | --                    |
| $H_{CT}/\text{\AA}$       | 1.591                 | 1.883                 | 1.633                 |
| $H/\text{\AA}$            | 3.280                 | 2.935                 | 3.725                 |
| $t/\text{\AA}$            | -1.157                | -1.100                | -1.448                |
| LE/%                      | 96.506                | 97.475                | 94.759                |
| CT/%                      | 3.494                 | 2.525                 | 5.241                 |

**Table S16.** Electron excitation characteristics of **SBDPiR690** in different transition states.

| SBDPiR690          |                                |                                |                                |                                |                                |
|--------------------|--------------------------------|--------------------------------|--------------------------------|--------------------------------|--------------------------------|
| Transition Process | S <sub>0</sub> →S <sub>1</sub> | S <sub>0</sub> →S <sub>4</sub> | S <sub>1</sub> →T <sub>1</sub> | S <sub>1</sub> →T <sub>2</sub> | S <sub>2</sub> →T <sub>2</sub> |
| Sr/a.u.            | 0.770                          | 0.712                          | --                             | --                             | --                             |
| D <sub>HE</sub> /Å | 0.693                          | 1.709                          | 0.638                          | 1.265                          | 2.879                          |
| Δσ/Å               | -0.319                         | -1.697                         | --                             | --                             | --                             |
| H <sub>CT</sub> /Å | 2.312                          | 2.200                          | 2.576                          | 3.567                          | 3.109                          |
| H/Å                | 4.119                          | 4.940                          | 3.495                          | 4.498                          | 3.787                          |
| t/Å                | -1.619                         | -0.490                         | -1.938                         | -2.302                         | -0.230                         |
| LE/%               | 77.977                         | 51.904                         | 82.030                         | 80.805                         | 94.342                         |
| CT/%               | 22.023                         | 48.096                         | 17.970                         | 19.195                         | 5.989                          |

**Table S17.** Electron excitation characteristics of **SBDPiR688** in different transition states.

| SBDPiR688          |                                |                                |                                |                                |                                |
|--------------------|--------------------------------|--------------------------------|--------------------------------|--------------------------------|--------------------------------|
| Transition Process | S <sub>0</sub> →S <sub>1</sub> | S <sub>0</sub> →S <sub>4</sub> | S <sub>1</sub> →T <sub>1</sub> | S <sub>1</sub> →T <sub>2</sub> | S <sub>2</sub> →T <sub>2</sub> |
| Sr/a.u.            | 0.764                          | 0.738                          | --                             | --                             | --                             |
| D <sub>HE</sub> /Å | 0.563                          | 1.437                          | 0.801                          | 1.127                          | 2.816                          |
| Δσ/Å               | -0.139                         | -1.410                         | --                             | --                             | --                             |
| H <sub>CT</sub> /Å | 2.468                          | 2.185                          | 2.229                          | 3.659                          | 3.161                          |
| H/Å                | 4.104                          | 4.845                          | 3.325                          | 4.436                          | 3.847                          |
| t/Å                | -1.906                         | -0.748                         | -1.428                         | -2.532                         | -0.345                         |
| LE/%               | 78.509                         | 42.951                         | 88.539                         | 88.032                         | 93.856                         |
| CT/%               | 21.491                         | 57.049                         | 11.429                         | 11.968                         | 6.732                          |



**Table S18.** Electron excitation characteristics of **SBDPiR698** in different transition states.

| SBDPiR698                 |                       |                       |                       |                       |                       |
|---------------------------|-----------------------|-----------------------|-----------------------|-----------------------|-----------------------|
| Transition Process        | $S_0 \rightarrow S_1$ | $S_0 \rightarrow S_4$ | $S_1 \rightarrow T_1$ | $S_1 \rightarrow T_2$ | $S_2 \rightarrow T_2$ |
| Sr/a.u.                   | 0.764                 | 0.694                 | --                    | --                    | --                    |
| $D_{HE}/\text{\AA}$       | 0.711                 | 1.815                 | 0.681                 | 1.246                 | 0.307                 |
| $\Delta\sigma/\text{\AA}$ | -0.365                | -1.833                | --                    | --                    | --                    |
| $H_{CT}/\text{\AA}$       | 2.273                 | 2.190                 | 2.483                 | 3.578                 | 3.115                 |
| $H/\text{\AA}$            | 4.105                 | 4.957                 | 3.449                 | 4.480                 | 3.796                 |
| $t/\text{\AA}$            | -1.562                | -0.375                | -1.802                | -2.332                | -0.246                |
| LE/%                      | 77.722                | 50.990                | 82.214                | 79.205                | 94.355                |
| CT/%                      | 22.278                | 49.010                | 17.786                | 20.795                | 5.951                 |

**Table S19.** Electron excitation characteristics of **SBDPiR710**, **SBDPiR731** and **DMA-BODIPY** in different transition states. It is important to note that the  $S_0 \rightarrow S_2$  processes of DMA-BODIPY are attributed to CT excitation.

|                                     | Sr/a.u. | $D_{HE}/\text{\AA}$ | $\Delta\sigma/\text{\AA}$ | $H_{CT}/\text{\AA}$ | $H/\text{\AA}$ | $t/\text{\AA}$ | LE     | CT     |
|-------------------------------------|---------|---------------------|---------------------------|---------------------|----------------|----------------|--------|--------|
| SBDPiR710<br>$S_0 \rightarrow S_1$  | 0.760   | 0.803               | -0.477                    | 2.296               | 4.252          | -1.493         | 74.192 | 25.808 |
| SBDPiR731<br>$S_0 \rightarrow S_1$  | 0.759   | 1.006               | -0.702                    | 2.388               | 4.444          | -1.382         | 70.182 | 29.818 |
| DMA-BODIPY<br>$S_0 \rightarrow S_1$ | 0.752   | 0.536               | 0.062                     | 1.635               | 3.301          | -1.099         | 94.415 | 5.585  |
| DMA-BODIPY<br>$S_0 \rightarrow S_2$ | 0.400   | 4.108               | 0.594                     | 2.063               | 2.962          | 2.064          | 14.89  | 85.12  |

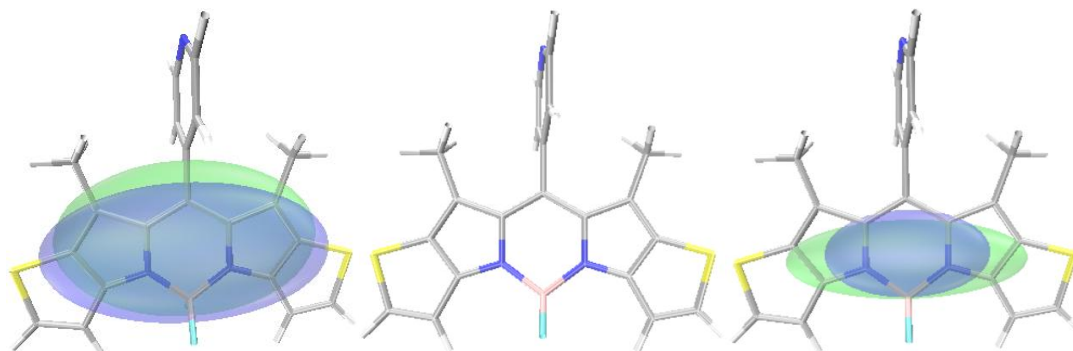

**Figure S10.** cele&chole graph in  $S_0 \rightarrow S_1$  transition and difference map for electron density in  $S_1 \rightarrow T_1$ ,  $S_1 \rightarrow T_2$  transition of **PY-BODIPY**. The figure S10-S12, S14-S17 can visually represent the electron excitation characteristics of LE.

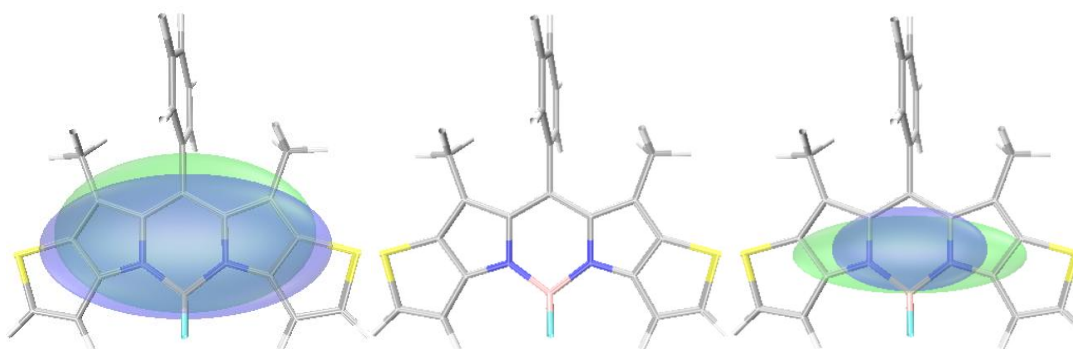

**Figure S11.** cele&chole graph in  $S_0 \rightarrow S_1$  transition and difference map for electron density in  $S_1 \rightarrow T_1$ ,  $S_1 \rightarrow T_2$  transition of **PH-BODIPY**.

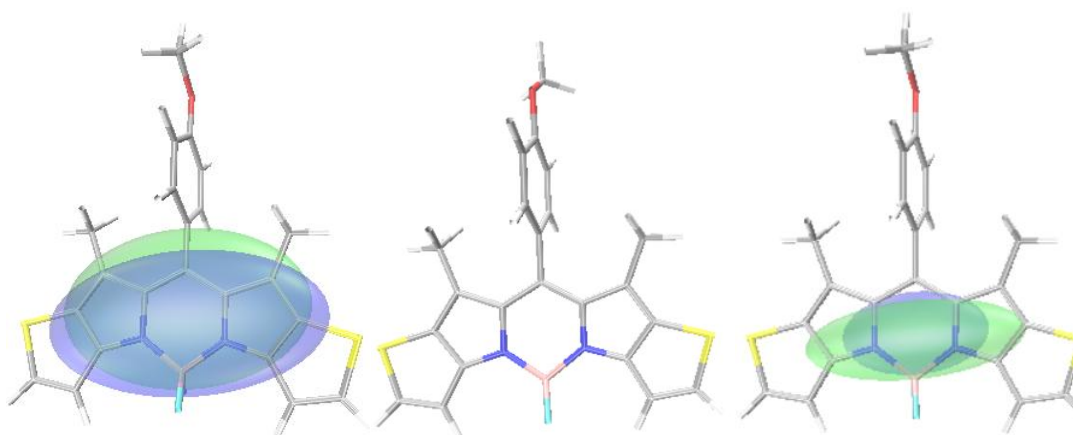

**Figure S12.** cele&chole graph in  $S_0 \rightarrow S_1$  transition and difference map for electron density in  $S_1 \rightarrow T_1$ ,  $S_1 \rightarrow T_2$  transition of **MeO-BODIPY**.

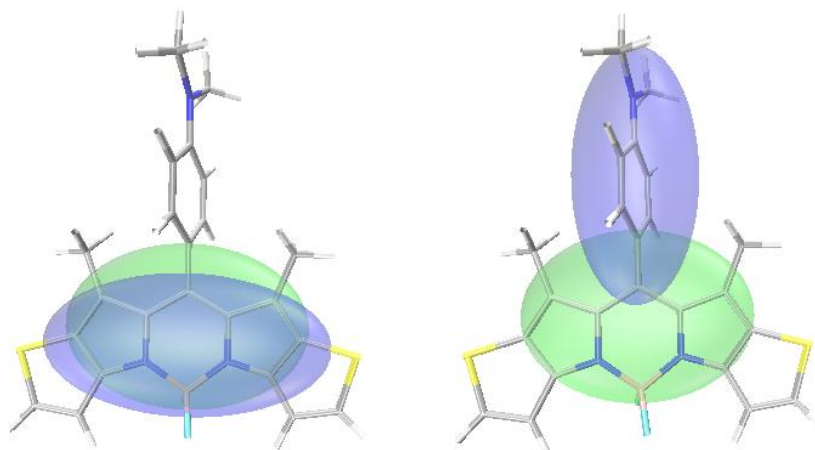

**Figure S13.** cele&chole graph in  $S_0 \rightarrow S_1$  and  $S_0 \rightarrow S_2$  transition of **DMA-BODIPY**.

It is evident that  $S_0 \rightarrow S_1$  is LE excitation, while  $S_0 \rightarrow S_2$  is attributed to CT excitation.

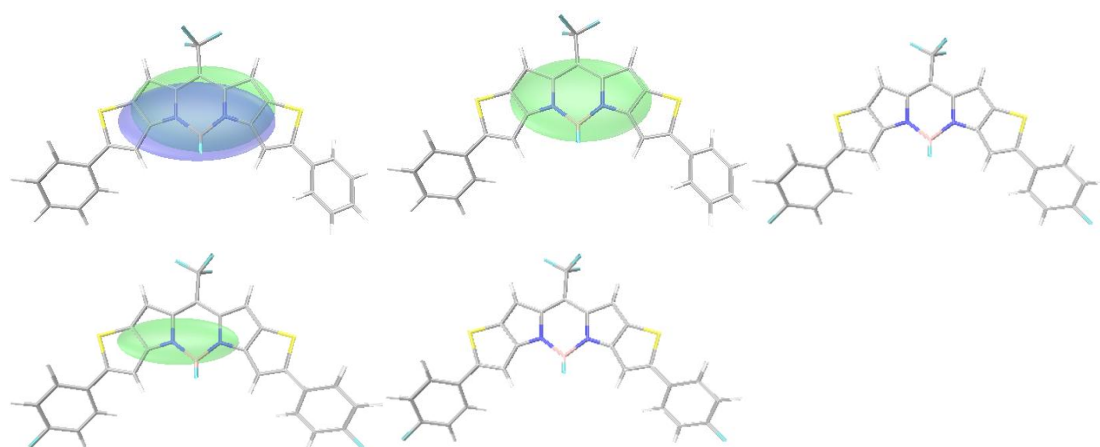

**Figure S14.** cele&chole graph in  $S_0 \rightarrow S_1$  and  $S_0 \rightarrow S_4$  transition, difference map for electron density in  $S_1 \rightarrow T_1$ ,  $S_1 \rightarrow T_2$  and  $S_2 \rightarrow T_2$  transition of **SBDPiR690**.

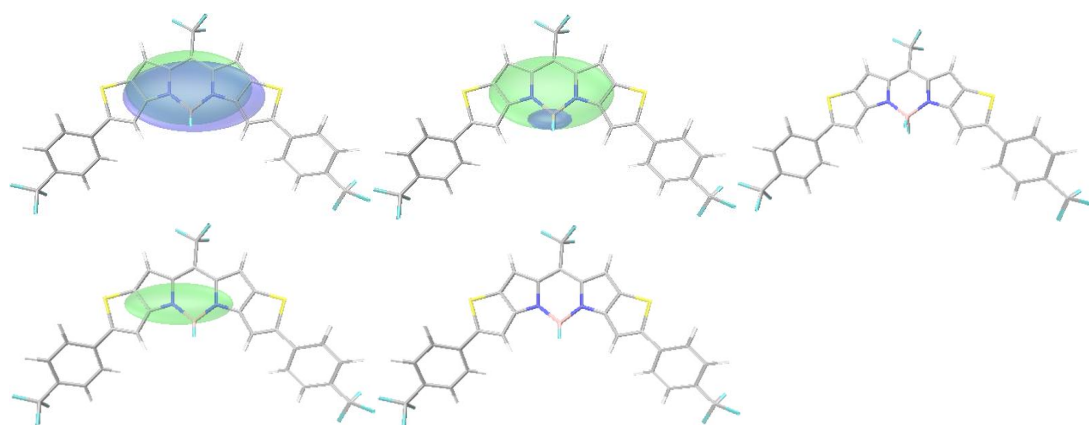

**Figure S15.** cele&chole graph in  $S_0 \rightarrow S_1$  and  $S_0 \rightarrow S_4$  transition, difference map for electron density in  $S_1 \rightarrow T_1$ ,  $S_1 \rightarrow T_2$  and  $S_2 \rightarrow T_2$  transition of **SBDPiR688**.

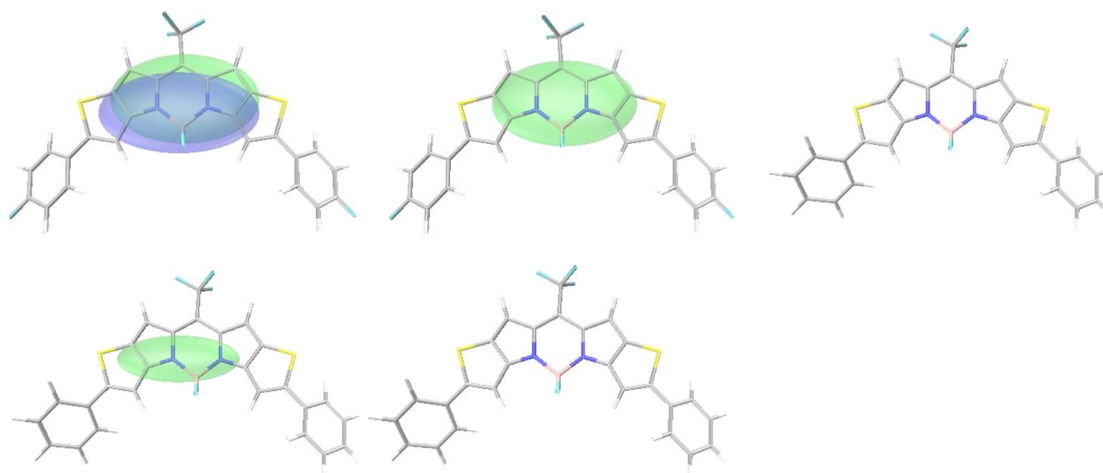

**Figure S16.** cele&chole graph in  $S_0 \rightarrow S_1$  and  $S_0 \rightarrow S_4$  transition, difference map for electron density in  $S_1 \rightarrow T_1$ ,  $S_1 \rightarrow T_2$  and  $S_2 \rightarrow T_2$  transition of **SBDPiR698**.

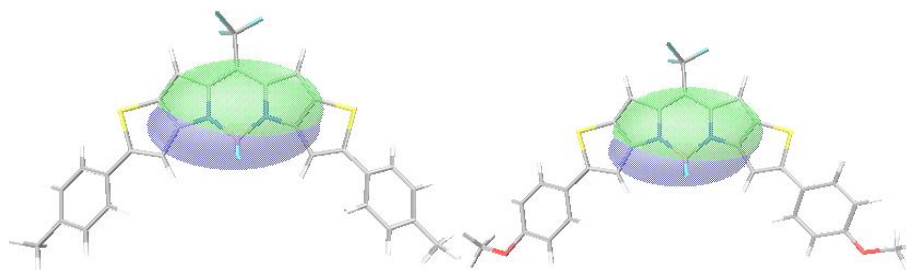

**Figure S17.** cele&chole graph in  $S_0 \rightarrow S_1$  transition of **SBDPiR710** (left) and **SBDPiR731**(right).

**Table S20.** The adiabatic energy of the ground state, singlet and triplet excited-states at their optimized geometries, along with SOC between the involved T<sub>1</sub> and S<sub>1</sub> states, T<sub>2</sub> and S<sub>1</sub> states.

|                                                        | PY-BODIPY   | PH-BODIPY   | MeO-BODIPY  | DMA-BODIPY  |
|--------------------------------------------------------|-------------|-------------|-------------|-------------|
| S <sub>0</sub> (hartree)                               | -1955.47574 | -1939.44251 | -2053.92751 | -2073.36165 |
| S <sub>1</sub> (hartree)                               | -1955.39420 | -1939.36001 | -2053.84472 | -2073.27827 |
| T <sub>1</sub> (hartree)                               | -1955.42397 | -1939.38947 | -2053.87414 | -2073.30745 |
| T <sub>2</sub> (hartree)                               | -1955.39243 | -1939.35793 | -2053.84252 | -2073.29009 |
| S <sub>0</sub> -T <sub>1</sub> (hartree)               | 0.0518      | 0.0530      | 0.0534      | 0.0542      |
| S <sub>0</sub> -T <sub>1</sub> (eV)                    | 1.409       | 1.443       | 1.452       | 1.475       |
| S <sub>1</sub> -T <sub>1</sub> (hartree)               | 0.0298      | 0.0295      | 0.0294      | 0.0292      |
| S <sub>1</sub> -T <sub>1</sub> (eV)                    | 0.810       | 0.802       | 0.801       | 0.794       |
| S <sub>1</sub> -T <sub>2</sub> (hartree)               | 0.0018      | 0.0021      | 0.0022      | 0.0118      |
| S <sub>1</sub> -T <sub>2</sub> (eV)                    | 0.048       | 0.056       | 0.060       | 0.322       |
| SOC S <sub>1</sub> -T <sub>1</sub> (cm <sup>-1</sup> ) | 0.18        | 0.13        | 0.14        | 0.35        |
| SOC S <sub>1</sub> -T <sub>2</sub> (cm <sup>-1</sup> ) | 2.19        | 2.18        | 2.17        | 0.97        |

**Table S21.** The adiabatic energy of the ground state, singlet and triplet excited-states at their optimized geometries, along with SOC between the involved T<sub>1</sub> and S<sub>1</sub> states, T<sub>2</sub> and S<sub>1</sub> states, T<sub>2</sub> and S<sub>2</sub> states.

|                                                           | SBDPiR690   | SBDPiR688   | SBDPiR698   | SBDPiR710   | SBDPiR731   |
|-----------------------------------------------------------|-------------|-------------|-------------|-------------|-------------|
| S <sub>0</sub> (hartree)                                  | -2428.76630 | -3102.67417 | -2627.18827 | -2507.36699 | -2657.73652 |
| S <sub>1</sub> (hartree)                                  | -2428.69940 | -3102.60604 | -2627.12119 | -2507.30150 | -2657.67332 |
| S <sub>2</sub> (hartree)                                  | -2428.67110 | -3102.58005 | -2627.09289 | -2507.27148 | -2657.63988 |
| T <sub>1</sub> (hartree)                                  | -2428.72968 | -3102.63667 | -2627.15155 | -2507.33091 | -2657.70158 |
| T <sub>2</sub> (hartree)                                  | -2428.68840 | -3102.59756 | -2627.11009 | -2507.28840 | -2657.65683 |
| S <sub>0</sub> -T <sub>1</sub><br>(hartree)               | 0.0366      | 0.0375      | 0.0367      | 0.0361      | 0.0349      |
| S <sub>0</sub> -T <sub>1</sub><br>(eV)                    | 0.996       | 1.020       | 0.999       | 0.982       | 0.951       |
| S <sub>1</sub> -T <sub>1</sub><br>(hartree)               | 0.0303      | 0.0306      | 0.0304      | 0.0294      | 0.0283      |
| S <sub>1</sub> -T <sub>1</sub><br>(eV)                    | 0.824       | 0.834       | 0.826       | 0.800       | 0.769       |
| S <sub>1</sub> -T <sub>2</sub><br>(hartree)               | 0.0110      | 0.0085      | 0.0111      | 0.0131      | 0.0165      |
| S <sub>1</sub> -T <sub>2</sub><br>(eV)                    | 0.299       | 0.231       | 0.302       | 0.357       | 0.449       |
| S <sub>2</sub> -T <sub>2</sub><br>(hartree)               | 0.0173      | 0.0175      | 0.0172      | 0.0169      | 0.0169      |
| S <sub>2</sub> -T <sub>2</sub><br>(eV)                    | 0.471       | 0.476       | 0.468       | 0.460       | 0.461       |
| SOC<br>S <sub>1</sub> -T <sub>1</sub> (cm <sup>-1</sup> ) | 0.03        | 0.09        | 0.10        | 0.04        | 0.02        |
| SOC<br>S <sub>1</sub> -T <sub>2</sub> (cm <sup>-1</sup> ) | 0.57        | 0.62        | 0.50        | 0.38        | 0.35        |
| SOC<br>S <sub>2</sub> -T <sub>2</sub> (cm <sup>-1</sup> ) | 2.42        | 2.04        | 2.10        | 1.94        | 1.84        |

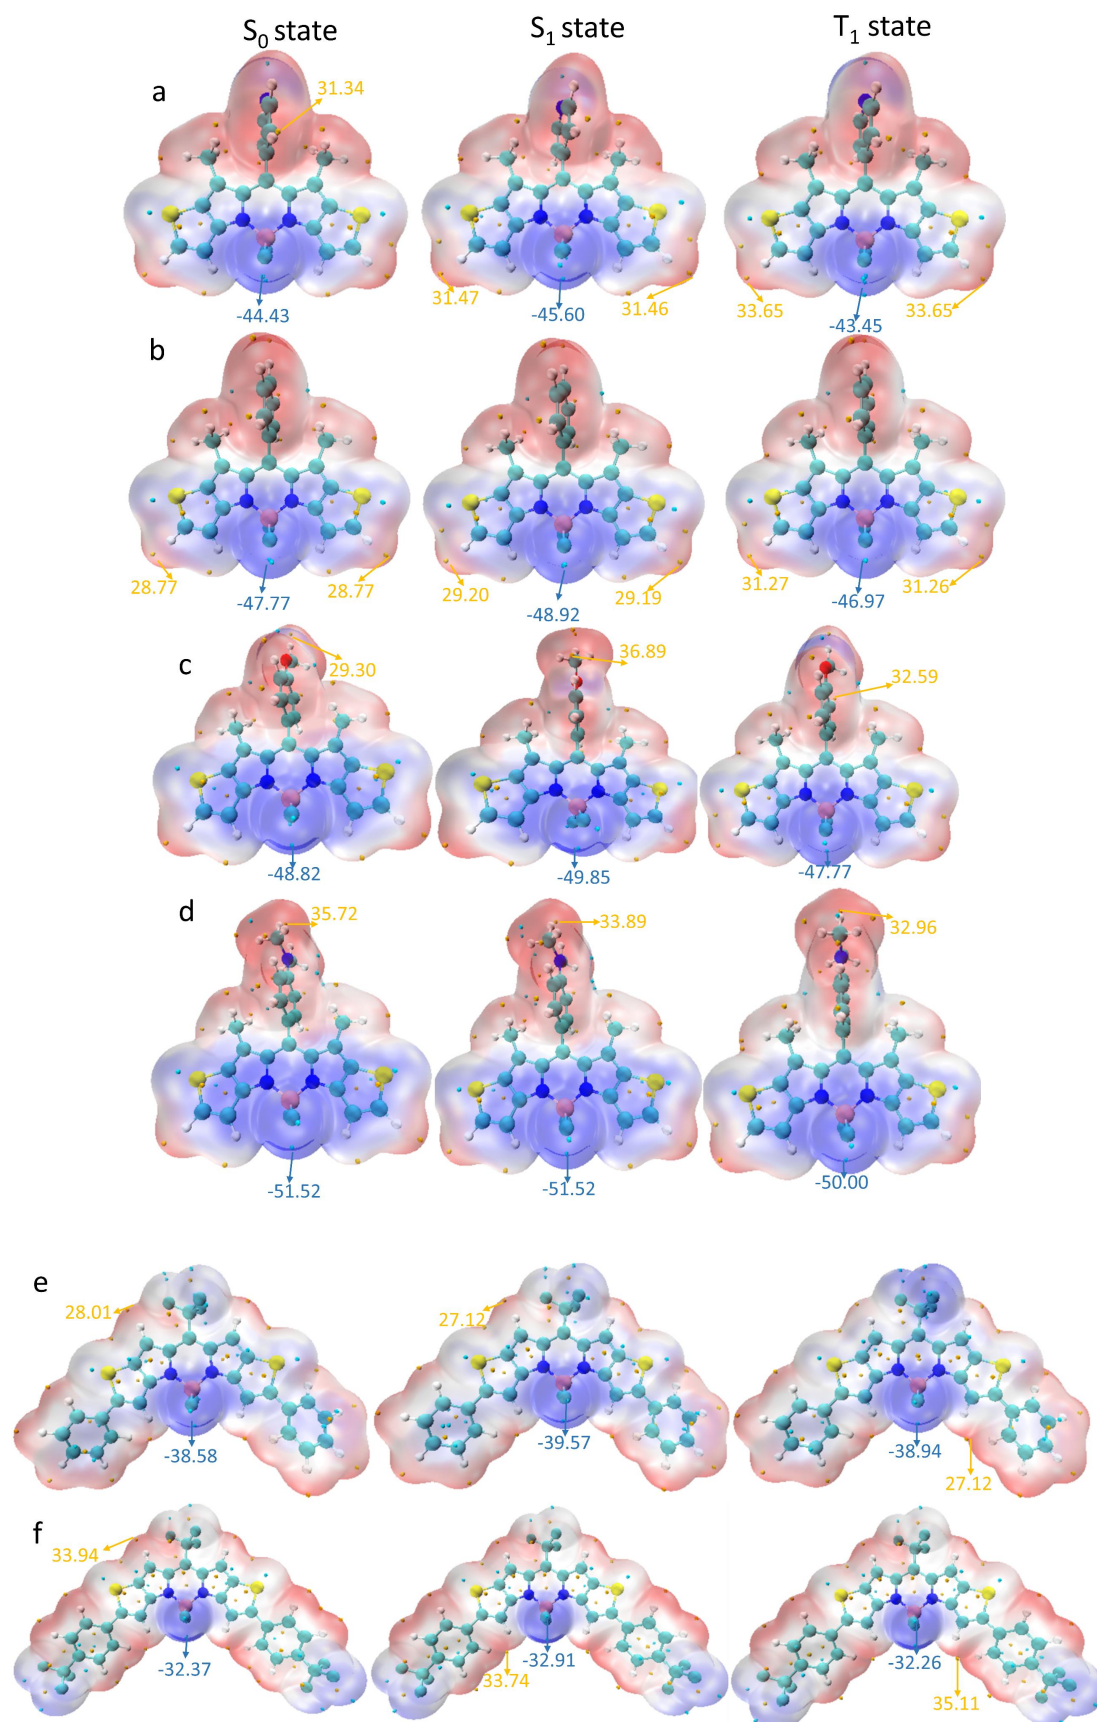



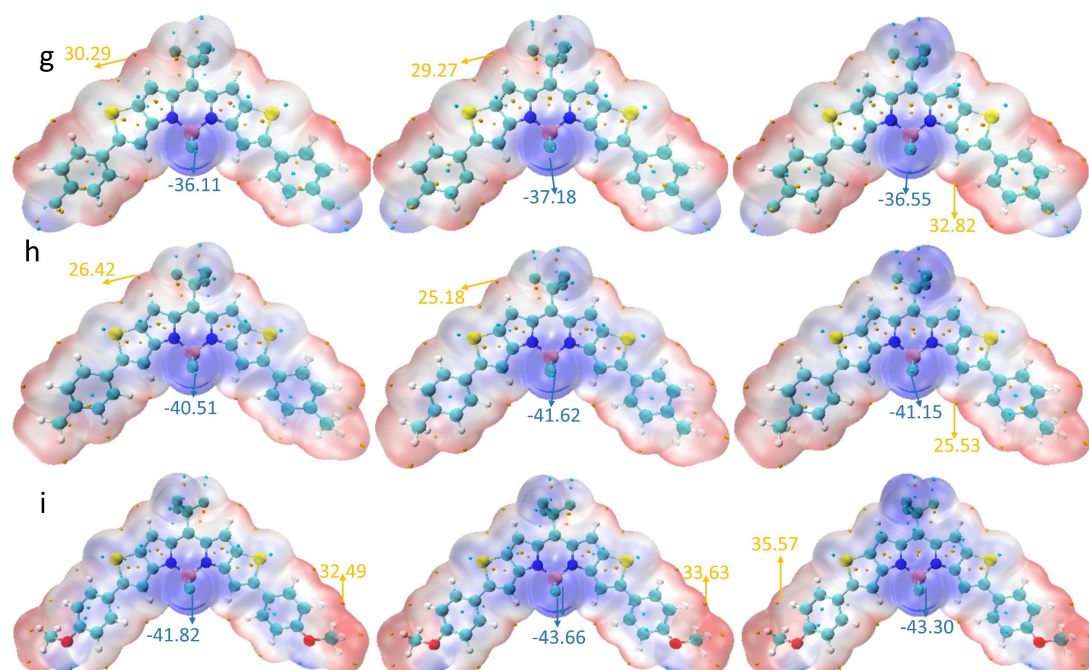

**Figure S18.** (a) Electrostatic potential surface plots of **PY-BODIPY** at the  $S_0$  state(left),  $S_1$  (middle) state and  $T_1$  (right) state. (b)**PH-BODIPY**, (c)**MeO-BODIPY**, (d)**DMA-BODIPY**, (e)**SBDPiR690**, (f) **SBDPiR688**, (g) **SBDPiR698**, (h) **SBDPiR710**, (i) **SBDPiR731**. The blue font indicates the electrostatic potential value at the minimum value point, while the yellow font corresponds to the electrostatic potential value at the maximum value point (The unit of the value is Kcal/mol). Among all compounds, the average value of the molecular surface electrostatic potential near the fluorine atom on the parent nucleus of BODIPY is the most negative (-51.52 to -32.26 kcal/mol). This is attributed to the fact that the lone electron pairs in the 2p orbital of the fluorine atom after forming  $\sigma$ -bond can still be transferred to the empty orbital of other atoms and participate in the formation of  $\pi$  bonds, large  $\pi$  bonds, and d-p  $\pi$  bonds. From PY-BODIPY, PH-BODIPY, MeO-BODIPY to DAM-BODIPY, with the increase of the electron donor ability at the meso substituents, the minimum value of the surface electrostatic potential decreases gradually. For SBDPiR710 and SBDPiR731, the electron-donor group positioned para to the phenyl group exhibits a significantly lower surface electrostatic potential minimum compared to that of the molecules (SBDPiR690, SBDPiR688, SBDPiR698) where the electron-withdrawing group is para-linked to the phenyl group. The distribution of the surface electrostatic potential maximum of  $S_0$  and  $S_1$  states was consistent for all compounds except PH-BODIPY and SBDPiR688. Even for PH-BODIPY, MeO-BODIPY and DAM-BODIPY, the distribution of the surface electrostatic potential maxima is the same in the  $S_0$ ,  $S_1$ ,  $T_1$  states. The maximum surface potential of PH-BODIPY is on the thiophene ring, whereas for MeO-BODIPY and DAM-BODIPY, the maximum surface potential is concentrated on the substituent group of the meso position.



XYZcoordinates(angstrom)

Note: upper case letters before the atomic coordinates indicate the atomic symbol of the atom involved in the calculations.

PY-BODIPY in S<sub>0</sub> State

|   |             |             |             |
|---|-------------|-------------|-------------|
| C | 1.22010500  | 0.20432300  | 0.00691700  |
| N | 1.23092300  | -1.19429700 | 0.01245500  |
| B | -0.00001000 | -2.12055400 | 0.00012800  |
| N | -1.23093400 | -1.19428700 | -0.01245500 |
| C | -1.22010600 | 0.20433300  | -0.00690100 |
| C | 0.00000200  | 0.89482900  | 0.00001500  |
| C | -2.51757500 | -1.58437200 | -0.00359600 |
| C | -3.35557900 | -0.44678100 | 0.00812600  |
| C | -2.56971300 | 0.69762300  | 0.00947000  |
| C | 2.56971400  | 0.69760400  | -0.00950800 |
| C | 3.35557200  | -0.44680600 | -0.00821700 |
| C | 2.51756000  | -1.58439100 | 0.00353600  |
| C | -3.22525000 | -2.82595300 | 0.00223000  |
| C | -4.56780200 | -2.59496000 | 0.01746600  |
| S | -5.03559500 | -0.90842400 | 0.02495400  |
| S | 5.03558400  | -0.90845900 | -0.02513100 |
| C | 4.56778100  | -2.59499300 | -0.01762700 |
| C | 3.22522800  | -2.82597700 | -0.00232700 |
| C | -3.08022700 | 2.10458400  | 0.02103900  |
| F | -0.01265300 | -2.94083100 | 1.13811200  |
| F | 0.01262200  | -2.94115300 | -1.13761900 |
| C | 3.08023500  | 2.10456200  | -0.02108600 |
| C | 0.00001100  | 2.38278900  | 0.00001900  |
| C | 0.16778500  | 3.09401500  | 1.18738100  |
| C | 0.15708500  | 4.48581400  | 1.13288700  |
| C | -0.15702800 | 4.48582300  | -1.13283700 |
| C | -0.16774900 | 3.09402500  | -1.18733900 |
| H | -2.77579400 | -3.81085800 | -0.00389300 |
| H | -5.35188300 | -3.34302800 | 0.02451700  |
| H | 5.35185600  | -3.34306600 | -0.02472000 |
| H | 2.77576500  | -3.81087800 | 0.00381300  |
| H | -4.15465800 | 2.10098700  | 0.22024000  |
| H | -2.91784900 | 2.59453000  | -0.94391400 |
| H | -2.59234000 | 2.71176400  | 0.78740800  |
| H | 4.15466400  | 2.10096200  | -0.22029400 |
| H | 2.91786200  | 2.59451300  | 0.94386500  |
| H | 2.59234400  | 2.71174000  | -0.78745500 |
| H | 0.30202300  | 2.57902800  | 2.13376400  |
| H | 0.28234200  | 5.06733400  | 2.04255700  |
| H | -0.28227600 | 5.06735100  | -2.04250300 |
| H | -0.30199300 | 2.57904600  | -2.13372600 |

|   |            |            |            |
|---|------------|------------|------------|
| N | 0.00003300 | 5.17926500 | 0.00002800 |
|---|------------|------------|------------|

PY-BODIPY in S<sub>1</sub> State

|   |             |             |             |
|---|-------------|-------------|-------------|
| C | 1.22139200  | 0.20142100  | 0.01113000  |
| N | 1.22368700  | -1.18026900 | 0.04922100  |
| B | 0.00020200  | -2.10513700 | 0.00002700  |
| N | -1.22342800 | -1.18047100 | -0.04921900 |
| C | -1.22134000 | 0.20121300  | -0.01115200 |
| C | -0.00004200 | 0.92114500  | -0.00000200 |
| C | -2.52516600 | -1.59548400 | -0.03714900 |
| C | -3.36847300 | -0.45922100 | 0.01079600  |
| C | -2.59904700 | 0.68840400  | 0.04263600  |
| C | 2.59904400  | 0.68879600  | -0.04275400 |
| C | 3.36862600  | -0.45872200 | -0.01084400 |
| C | 2.52548200  | -1.59509800 | 0.03716900  |
| C | -3.21077600 | -2.82702600 | -0.04119000 |
| C | -4.57070100 | -2.61242600 | -0.00207300 |
| S | -5.04704000 | -0.93825800 | 0.04263800  |
| S | 5.04726100  | -0.93752700 | -0.04269500 |
| C | 4.57115700  | -2.61175800 | 0.00213100  |
| C | 3.21126300  | -2.82654400 | 0.04126700  |
| C | -3.10291400 | 2.08986300  | 0.14508400  |
| F | -0.04747600 | -2.93148400 | 1.13584500  |
| F | 0.04800900  | -2.93154000 | -1.13574500 |
| C | 3.10277300  | 2.09029400  | -0.14535800 |
| C | -0.00022800 | 2.40479500  | 0.00002100  |
| C | 0.34947700  | 3.12648000  | 1.14435200  |
| C | 0.33131500  | 4.51786000  | 1.09373900  |
| C | -0.33247700 | 4.51780600  | -1.09358800 |
| C | -0.35021300 | 3.12642200  | -1.14426100 |
| H | -2.75607900 | -3.80958800 | -0.06984800 |
| H | -5.34403100 | -3.37207000 | 0.00052400  |
| H | 5.34459200  | -3.37129500 | -0.00043400 |
| H | 2.75670200  | -3.80916800 | 0.06997800  |
| H | -4.15922500 | 2.07729300  | 0.42656500  |
| H | -3.01494600 | 2.62599100  | -0.80680700 |
| H | -2.55503300 | 2.66691400  | 0.89563000  |
| H | 4.15907400  | 2.07778300  | -0.42688200 |
| H | 3.01480700  | 2.62650500  | 0.80648400  |
| H | 2.55481900  | 2.66722600  | -0.89593900 |
| H | 0.62539800  | 2.61413200  | 2.06128800  |
| H | 0.59466800  | 5.09887700  | 1.97404300  |
| H | -0.59603100 | 5.09878000  | -1.97386000 |

|   |             |            |             |
|---|-------------|------------|-------------|
| H | -0.62600700 | 2.61402900 | -2.06120900 |
| N | -0.00068200 | 5.21370400 | 0.00008900  |

PY-BODIPY in T<sub>1</sub> State

|   |             |             |             |
|---|-------------|-------------|-------------|
| C | 1.21324300  | 0.19188900  | 0.00922200  |
| N | 1.21973700  | -1.17743900 | 0.03134100  |
| B | 0.00000800  | -2.10497100 | 0.00000200  |
| N | -1.21972700 | -1.17744700 | -0.03133900 |
| C | -1.21324100 | 0.19188200  | -0.00922200 |
| C | -0.00000200 | 0.91757300  | 0.00000100  |
| C | -2.53474500 | -1.59625200 | -0.02094700 |
| C | -3.37329200 | -0.46067800 | 0.01013000  |
| C | -2.60040100 | 0.68461200  | 0.02846600  |
| C | 2.60040100  | 0.68462700  | -0.02846900 |
| C | 3.37329800  | -0.46065900 | -0.01013200 |
| C | 2.53475600  | -1.59623800 | 0.02094800  |
| C | -3.21408600 | -2.82590200 | -0.02097300 |
| C | -4.57668900 | -2.61306800 | 0.00705900  |
| S | -5.04950400 | -0.93618900 | 0.03498900  |
| S | 5.04951200  | -0.93616200 | -0.03499400 |
| C | 4.57670600  | -2.61304400 | -0.00706000 |
| C | 3.21410400  | -2.82588400 | 0.02097500  |
| C | -3.09477800 | 2.09123500  | 0.09740700  |
| F | -0.03092600 | -2.93273800 | 1.13605700  |
| F | 0.03094600  | -2.93274200 | -1.13605000 |
| C | 3.09477200  | 2.09125100  | -0.09741500 |
| C | -0.00000800 | 2.40490200  | 0.00000100  |
| C | 0.28123900  | 3.12926100  | 1.16123200  |
| C | 0.26945200  | 4.52104600  | 1.11032500  |
| C | -0.26949500 | 4.52104400  | -1.11032100 |
| C | -0.28126700 | 3.12925900  | -1.16122800 |
| H | -2.75710000 | -3.80740200 | -0.03891800 |
| H | -5.35029000 | -3.37130200 | 0.01130900  |
| H | 5.35031100  | -3.37127300 | -0.01130900 |
| H | 2.75712300  | -3.80738700 | 0.03892200  |
| H | -4.16378400 | 2.09057500  | 0.32530600  |
| H | -2.95196000 | 2.61849300  | -0.85188500 |
| H | -2.57980700 | 2.66672700  | 0.87183400  |
| H | 4.16377800  | 2.09059400  | -0.32531700 |
| H | 2.95195500  | 2.61851200  | 0.85187600  |
| H | 2.57979800  | 2.66673900  | -0.87184200 |
| H | 0.50359100  | 2.61737100  | 2.09302000  |
| H | 0.48441700  | 5.10197000  | 2.00383300  |

|   |             |            |             |
|---|-------------|------------|-------------|
| H | -0.48446700 | 5.10196600 | -2.00382800 |
| H | -0.50361300 | 2.61736700 | -2.09301700 |
| N | -0.00002500 | 5.21741400 | 0.00000200  |

PY-BODIPY in T<sub>2</sub> State

|   |             |             |             |
|---|-------------|-------------|-------------|
| C | 1.22804700  | 0.21021100  | -0.00241300 |
| N | 1.21339800  | -1.18948400 | 0.04755800  |
| B | 0.00208200  | -2.09970500 | 0.04622400  |
| N | -1.24588400 | -1.15711900 | -0.02278300 |
| C | -1.22555300 | 0.27126200  | -0.00008000 |
| C | -0.00994600 | 0.93657500  | 0.00013900  |
| C | -2.52360000 | -1.58702300 | -0.03828900 |
| C | -3.37140700 | -0.46399200 | -0.00593600 |
| C | -2.57760400 | 0.73738900  | 0.03897400  |
| C | 2.55853600  | 0.67277500  | -0.06781200 |
| C | 3.34547900  | -0.50098600 | -0.03609800 |
| C | 2.50786800  | -1.61575000 | 0.02831700  |
| C | -3.20824900 | -2.84185500 | -0.05054600 |
| C | -4.55562800 | -2.64080400 | -0.03311700 |
| S | -4.99135700 | -0.93249200 | 0.00656900  |
| S | 5.01135900  | -0.98012300 | -0.07734900 |
| C | 4.54322400  | -2.66917500 | -0.01173100 |
| C | 3.19558700  | -2.86901900 | 0.04042600  |
| C | -3.11768700 | 2.11913700  | 0.12142000  |
| F | -0.09097300 | -2.87218500 | 1.21189000  |
| F | -0.02167000 | -2.95625400 | -1.06170800 |
| C | 3.10921200  | 2.06546000  | -0.16638600 |
| C | 0.01357700  | 2.42250700  | 0.00758200  |
| C | 0.36768100  | 3.13010900  | 1.15852700  |
| C | 0.37172700  | 4.52172600  | 1.11716400  |
| C | -0.27585100 | 4.54687500  | -1.07483300 |
| C | -0.31426700 | 3.15564000  | -1.13462200 |
| H | -2.73565000 | -3.81593500 | -0.07225800 |
| H | -5.34986800 | -3.37513200 | -0.04125300 |
| H | 5.32044200  | -3.42274300 | -0.01348300 |
| H | 2.72939700  | -3.84587300 | 0.08511200  |
| H | -4.16401100 | 2.09559500  | 0.43598100  |
| H | -3.07096800 | 2.62240100  | -0.85301100 |
| H | -2.55415600 | 2.73240900  | 0.82948700  |
| H | 4.13740200  | 2.02156300  | -0.53755500 |
| H | 3.13149500  | 2.56871900  | 0.80642500  |
| H | 2.53563600  | 2.69396400  | -0.85123100 |
| H | 0.63361500  | 2.60650300  | 2.07204900  |
| H | 0.63898300  | 5.09321400  | 2.00252800  |

|   |             |            |             |
|---|-------------|------------|-------------|
| H | -0.52427500 | 5.13774000 | -1.95298400 |
| H | -0.58783800 | 2.65286300 | -2.05749200 |
| N | 0.05766800  | 5.23012600 | 0.02569200  |

PH-BODIPY in S<sub>0</sub> State

|   |             |             |             |
|---|-------------|-------------|-------------|
| C | 1.21931300  | 0.20220000  | -0.01030700 |
| N | 1.23034300  | -1.19677200 | -0.02672000 |
| B | -0.00000600 | -2.12214100 | 0.00002100  |
| N | -1.23035300 | -1.19676700 | 0.02674300  |
| C | -1.21931500 | 0.20220500  | 0.01033200  |
| C | 0.00000000  | 0.89686300  | 0.00001200  |
| C | -2.51695900 | -1.58767300 | 0.01421400  |
| C | -3.35469400 | -0.45104200 | -0.01091800 |
| C | -2.56841900 | 0.69412300  | -0.02023900 |
| C | 2.56841900  | 0.69411200  | 0.02024700  |
| C | 3.35468900  | -0.45105800 | 0.01090600  |
| C | 2.51694900  | -1.58768400 | -0.01421500 |
| C | -3.22446900 | -2.82975400 | 0.01128500  |
| C | -4.56700100 | -2.59971900 | -0.01397700 |
| S | -5.03437100 | -0.91310500 | -0.03460300 |
| S | 5.03436400  | -0.91312800 | 0.03456300  |
| C | 4.56698600  | -2.59974000 | 0.01394300  |
| C | 3.22445200  | -2.82976900 | -0.01129800 |
| C | -3.08248900 | 2.09929000  | -0.05956600 |
| F | 0.02660800  | -2.94402500 | 1.13758600  |
| F | -0.02662300 | -2.94404700 | -1.13752900 |
| C | 3.08250200  | 2.09927400  | 0.05957300  |
| C | 0.00000400  | 2.38435300  | 0.00000500  |
| C | -0.23333600 | 3.08250900  | 1.18785500  |
| C | -0.22711600 | 4.47628800  | 1.18701200  |
| C | 0.22715200  | 4.47627400  | -1.18702000 |
| C | 0.23335200  | 3.08249500  | -1.18785100 |
| H | -2.77465400 | -3.81443800 | 0.02612500  |
| H | -5.35087700 | -3.34794100 | -0.02080500 |
| H | 5.35085900  | -3.34796600 | 0.02075700  |
| H | 2.77463300  | -3.81445000 | -0.02613300 |
| H | -4.14361700 | 2.09107600  | -0.32156400 |
| H | -2.55102200 | 2.70995000  | -0.79325600 |
| H | -2.97892500 | 2.58807500  | 0.91412200  |
| H | 4.14361200  | 2.09105300  | 0.32164500  |
| H | 2.55099300  | 2.70996300  | 0.79320600  |
| H | 2.97901300  | 2.58802900  | -0.91413900 |
| H | -0.41500500 | 2.53293500  | 2.10782300  |

|   |             |            |             |
|---|-------------|------------|-------------|
| H | -0.40298000 | 5.01611100 | 2.11250500  |
| H | 0.40302400  | 5.01608700 | -2.11251800 |
| H | 0.41501500  | 2.53291100 | -2.10781300 |
| C | 0.00002300  | 5.17418900 | -0.00000700 |
| H | 0.00003100  | 6.26003500 | -0.00001200 |

PH-BODIPY in S<sub>1</sub> State

|   |             |             |             |
|---|-------------|-------------|-------------|
| C | 1.21950000  | 0.19612900  | -0.00767000 |
| N | 1.22378100  | -1.18680900 | -0.03575600 |
| B | 0.00000200  | -2.11121900 | 0.00002500  |
| N | -1.22378000 | -1.18681100 | 0.03575500  |
| C | -1.21950000 | 0.19612700  | 0.00767300  |
| C | 0.00000000  | 0.91845800  | 0.00000500  |
| C | -2.52597200 | -1.59962900 | 0.02408200  |
| C | -3.36767500 | -0.46131000 | -0.01192300 |
| C | -2.59661800 | 0.68547800  | -0.03342400 |
| C | 2.59661700  | 0.68548100  | 0.03341700  |
| C | 3.36767600  | -0.46130600 | 0.01190500  |
| C | 2.52597400  | -1.59962500 | -0.02409400 |
| C | -3.21431100 | -2.83006600 | 0.02424800  |
| C | -4.57381900 | -2.61361500 | -0.00695400 |
| S | -5.04744000 | -0.93744000 | -0.03811400 |
| S | 5.04744200  | -0.93743400 | 0.03808100  |
| C | 4.57382200  | -2.61360900 | 0.00692200  |
| C | 3.21431400  | -2.83006200 | -0.02426800 |
| C | -3.09659500 | 2.09030300  | -0.10358700 |
| F | 0.03471900  | -2.93884400 | 1.13619300  |
| F | -0.03471100 | -2.93890700 | -1.13609600 |
| C | 3.09659500  | 2.09030700  | 0.10358000  |
| C | -0.00000200 | 2.40448400  | 0.00000400  |
| C | -0.28945400 | 3.11165100  | 1.17268000  |
| C | -0.28724000 | 4.50560800  | 1.17324400  |
| C | 0.28723100  | 4.50560800  | -1.17323700 |
| C | 0.28944800  | 3.11165000  | -1.17267200 |
| H | -2.76116500 | -3.81355800 | 0.04492200  |
| H | -5.34837200 | -3.37192700 | -0.01129500 |
| H | 5.34837600  | -3.37192000 | 0.01125400  |
| H | 2.76116900  | -3.81355500 | -0.04494000 |
| H | -4.16053700 | 2.08687700  | -0.35533900 |
| H | -2.56499300 | 2.67576600  | -0.85934500 |
| H | -2.97723800 | 2.61183400  | 0.85291400  |
| H | 4.16053500  | 2.08688100  | 0.35533800  |
| H | 2.56498800  | 2.67577100  | 0.85933400  |

|   |             |            |             |
|---|-------------|------------|-------------|
| H | 2.97724300  | 2.61183500 | -0.85292300 |
| H | -0.51286600 | 2.56403900 | 2.08485100  |
| H | -0.50951000 | 5.04523700 | 2.08906600  |
| H | 0.50949900  | 5.04523600 | -2.08906000 |
| H | 0.51286200  | 2.56403800 | -2.08484200 |
| C | -0.00000600 | 5.20490000 | 0.00000300  |
| H | -0.00000700 | 6.29083600 | 0.00000300  |

PH-BODIPY in T<sub>1</sub> State

|   |             |             |             |
|---|-------------|-------------|-------------|
| C | 1.21082700  | 0.18648800  | -0.00579300 |
| N | 1.21966200  | -1.18371300 | -0.01665400 |
| B | 0.00000000  | -2.11095000 | 0.00003100  |
| N | -1.21966200 | -1.18371300 | 0.01665700  |
| C | -1.21082700 | 0.18648700  | 0.00579800  |
| C | 0.00000000  | 0.91452200  | 0.00000600  |
| C | -2.53551500 | -1.60022900 | 0.00765800  |
| C | -3.37230200 | -0.46292000 | -0.00883700 |
| C | -2.59765200 | 0.68146600  | -0.01494300 |
| C | 2.59765200  | 0.68146700  | 0.01493300  |
| C | 3.37230100  | -0.46292000 | 0.00881600  |
| C | 2.53551500  | -1.60022800 | -0.00767000 |
| C | -3.21732600 | -2.82882000 | 0.00344000  |
| C | -4.57965000 | -2.61430800 | -0.01478200 |
| S | -5.04957700 | -0.93591100 | -0.02714400 |
| S | 5.04957700  | -0.93591000 | 0.02710100  |
| C | 4.57965000  | -2.61430800 | 0.01474400  |
| C | 3.21732600  | -2.82881900 | -0.00346100 |
| C | -3.08620400 | 2.09135600  | -0.04137300 |
| F | 0.01662300  | -2.94011900 | 1.13630700  |
| F | -0.01662000 | -2.94019100 | -1.13619200 |
| C | 3.08620500  | 2.09135600  | 0.04135800  |
| C | -0.00000100 | 2.40440100  | 0.00000600  |
| C | -0.18713400 | 3.11438000  | 1.19147800  |
| C | -0.18777700 | 4.50877900  | 1.19286700  |
| C | 0.18777600  | 4.50877900  | -1.19285500 |
| C | 0.18713200  | 3.11438000  | -1.19146500 |
| H | -2.76181000 | -3.81115100 | 0.01217000  |
| H | -5.35443900 | -3.37125700 | -0.02069600 |
| H | 5.35443900  | -3.37125700 | 0.02064800  |
| H | 2.76181000  | -3.81115100 | -0.01218600 |
| H | -4.16559200 | 2.10118400  | -0.21391600 |
| H | -2.60463200 | 2.67475100  | -0.83137800 |
| H | -2.88881000 | 2.60375500  | 0.90628900  |

|   |             |            |             |
|---|-------------|------------|-------------|
| H | 4.16559200  | 2.10118400 | 0.21391000  |
| H | 2.60462600  | 2.67475800 | 0.83135300  |
| H | 2.88882200  | 2.60374800 | -0.90631100 |
| H | -0.33154800 | 2.56723400 | 2.11989000  |
| H | -0.33313600 | 5.04812700 | 2.12424500  |
| H | 0.33313500  | 5.04812700 | -2.12423300 |
| H | 0.33154600  | 2.56723400 | -2.11987700 |
| C | -0.00000100 | 5.20850000 | 0.00000600  |
| H | 0.00000000  | 6.29452200 | 0.00000600  |

PH-BODIPY in T<sub>2</sub> State

|   |             |             |             |
|---|-------------|-------------|-------------|
| C | -1.22608300 | 0.20384400  | -0.00360500 |
| N | -1.21045900 | -1.19674300 | 0.03975800  |
| B | 0.00215700  | -2.10464700 | 0.03677200  |
| N | 1.24850000  | -1.16055800 | -0.01843800 |
| C | 1.22399700  | 0.26898100  | 0.00381900  |
| C | 0.00951000  | 0.93502400  | 0.00174300  |
| C | 2.52791900  | -1.58708600 | -0.03053200 |
| C | 3.37216200  | -0.46110900 | 0.00072900  |
| C | 2.57527800  | 0.73807600  | 0.04012500  |
| C | -2.55723100 | 0.66529100  | -0.06043600 |
| C | -3.34327600 | -0.50939900 | -0.03288600 |
| C | -2.50468300 | -1.62408100 | 0.02291300  |
| C | 3.21632500  | -2.83941400 | -0.04246200 |
| C | 4.56355400  | -2.63498400 | -0.02565700 |
| S | 4.99392000  | -0.92515500 | 0.01214000  |
| S | -5.00917800 | -0.98962200 | -0.06872000 |
| C | -4.53996500 | -2.67895600 | -0.01285000 |
| C | -3.19182200 | -2.87770000 | 0.03246800  |
| C | 3.10962700  | 2.12287900  | 0.10754300  |
| F | 0.03272300  | -2.95349800 | -1.07797000 |
| F | 0.08973800  | -2.88794500 | 1.19642900  |
| C | -3.10898500 | 2.05878200  | -0.14064000 |
| C | -0.01618400 | 2.42282200  | 0.00675200  |
| C | 0.27659200  | 3.13998000  | -1.15807100 |
| C | 0.24662800  | 4.53432000  | -1.15315100 |
| C | -0.36510300 | 4.51184400  | 1.18373300  |
| C | -0.33960100 | 3.11819400  | 1.17715500  |
| H | 2.74648500  | -3.81487900 | -0.06339500 |
| H | 5.35974500  | -3.36709300 | -0.03290500 |
| H | -5.31661200 | -3.43308300 | -0.01479000 |
| H | -2.72487000 | -3.85451800 | 0.07071600  |
| H | 4.15983500  | 2.10730700  | 0.40973600  |



|   |             |            |             |
|---|-------------|------------|-------------|
| H | 2.54897200  | 2.73820800 | 0.81628300  |
| H | 3.04673900  | 2.61902700 | -0.86959100 |
| H | -4.13822800 | 2.01948700 | -0.50992200 |
| H | -2.53503200 | 2.69670500 | -0.81625600 |
| H | -3.12849300 | 2.54862100 | 0.83914200  |
| H | 0.52132500  | 2.60042300 | -2.06957500 |
| H | 0.47193800  | 5.08238500 | -2.06326500 |
| H | -0.61378400 | 5.04304900 | 2.09775200  |
| H | -0.57092900 | 2.56131200 | 2.08173900  |
| C | -0.07307000 | 5.22246100 | 0.01798000  |
| H | -0.09570900 | 6.30817100 | 0.02237500  |

MeO-BODIPY in S<sub>0</sub> State

|   |             |             |             |
|---|-------------|-------------|-------------|
| C | 0.15575700  | 1.22908100  | 0.01445000  |
| N | 1.54239700  | 1.39643000  | -0.06678700 |
| B | 2.60011700  | 0.27869800  | -0.07526700 |
| N | 1.82333900  | -1.04605700 | 0.02602000  |
| C | 0.43223800  | -1.19429800 | 0.04375500  |
| C | -0.39806100 | -0.06137600 | 0.05219400  |
| C | 2.35837000  | -2.27989700 | 0.00161400  |
| C | 1.32488000  | -3.24134700 | 0.00143500  |
| C | 0.09707300  | -2.59040700 | 0.01687900  |
| C | -0.47983700 | 2.51477700  | 0.09118100  |
| C | 0.56977500  | 3.42389700  | 0.03599200  |
| C | 1.78898500  | 2.71842000  | -0.05523600 |
| C | 3.67268500  | -2.84074400 | -0.03729600 |
| C | 3.59701400  | -4.20072200 | -0.06301400 |
| S | 1.97439200  | -4.85713700 | -0.04264400 |
| S | 0.84400000  | 5.14388000  | 0.06849300  |
| C | 2.56946700  | 4.86742000  | -0.03781300 |
| C | 2.94446900  | 3.55902400  | -0.09662300 |
| C | -1.23904400 | -3.26470200 | -0.00990300 |
| F | 3.47873300  | 0.42419000  | 1.00969000  |
| F | 3.35346500  | 0.31790900  | -1.25994300 |
| C | -1.92690600 | 2.87386500  | 0.22550000  |
| C | -1.87177300 | -0.22699500 | 0.10407100  |
| C | -2.49977800 | -0.62169900 | 1.29305800  |
| C | -3.87764400 | -0.76175900 | 1.34632200  |
| C | -4.03494900 | -0.14133200 | -0.99383900 |
| C | -2.64852700 | 0.01305100  | -1.02757000 |
| H | 4.59945500  | -2.28108600 | -0.04513400 |
| H | 4.42965400  | -4.89358800 | -0.09112200 |
| H | 3.22606000  | 5.72934700  | -0.05168400 |

|   |             |             |             |
|---|-------------|-------------|-------------|
| H | 3.97090700  | 3.22121300  | -0.16403700 |
| H | -1.11583700 | -4.30002800 | -0.33905300 |
| H | -1.93633800 | -2.76657000 | -0.68739800 |
| H | -1.69773100 | -3.28068500 | 0.98384200  |
| H | -2.01288400 | 3.91059700  | 0.56195900  |
| H | -2.44322800 | 2.23303800  | 0.94392700  |
| H | -2.45018600 | 2.78623100  | -0.73187900 |
| H | -1.90236200 | -0.81120500 | 2.18099400  |
| H | -4.37611200 | -1.05702300 | 2.26437900  |
| H | -4.61336700 | 0.04273000  | -1.89142500 |
| H | -2.16887000 | 0.31914300  | -1.95372600 |
| C | -4.65282700 | -0.52511900 | 0.20111800  |
| O | -5.98870300 | -0.69352100 | 0.34635100  |
| C | -6.81670900 | -0.45343200 | -0.78443100 |
| H | -6.72308600 | 0.58296500  | -1.12657800 |
| H | -6.57141700 | -1.13786600 | -1.60365100 |
| H | -7.83776900 | -0.63615800 | -0.45087100 |

MeO-BODIPY in S<sub>1</sub> State

|   |             |             |             |
|---|-------------|-------------|-------------|
| C | 0.16962100  | 1.22907600  | 0.02326500  |
| N | 1.54174800  | 1.38582300  | -0.05863800 |
| B | 2.59520300  | 0.27153600  | -0.06738800 |
| N | 1.81489000  | -1.04559700 | 0.02440800  |
| C | 0.43940800  | -1.19400800 | 0.03673600  |
| C | -0.41436200 | -0.06242200 | 0.05274700  |
| C | 2.36840400  | -2.29440400 | 0.00148700  |
| C | 1.32922600  | -3.25662200 | -0.00218600 |
| C | 0.10418300  | -2.61660400 | 0.00871000  |
| C | -0.46578600 | 2.54382600  | 0.09347700  |
| C | 0.58783800  | 3.43649900  | 0.03308500  |
| C | 1.80930400  | 2.72520500  | -0.05409000 |
| C | 3.66680100  | -2.84301600 | -0.03445700 |
| C | 3.60056700  | -4.21812200 | -0.06068900 |
| S | 1.98640100  | -4.87346700 | -0.04476800 |
| S | 0.87756900  | 5.15798400  | 0.05636300  |
| C | 2.59357700  | 4.87168000  | -0.04474200 |
| C | 2.95617300  | 3.54428700  | -0.09599500 |
| C | -1.23825600 | -3.26872600 | -0.02456700 |
| F | 3.47495100  | 0.40985700  | 1.02079400  |
| F | 3.35949400  | 0.31549600  | -1.24767700 |
| C | -1.91279500 | 2.88687600  | 0.22448400  |
| C | -1.88870800 | -0.22457400 | 0.10425600  |
| C | -2.52654200 | -0.60540200 | 1.29460900  |

|   |             |             |             |
|---|-------------|-------------|-------------|
| C | -3.90483600 | -0.74774900 | 1.34932000  |
| C | -4.06089000 | -0.13930700 | -0.99200400 |
| C | -2.67243100 | 0.00401800  | -1.02695900 |
| H | 4.59441800  | -2.28398700 | -0.04099000 |
| H | 4.43930600  | -4.90409900 | -0.08642200 |
| H | 3.26178100  | 5.72493900  | -0.06244500 |
| H | 3.98174100  | 3.20170700  | -0.15881700 |
| H | -1.12561100 | -4.32306200 | -0.29190500 |
| H | -1.90375900 | -2.79583000 | -0.75250000 |
| H | -1.73806500 | -3.21955100 | 0.94967700  |
| H | -2.01471100 | 3.94186300  | 0.49372400  |
| H | -2.40771700 | 2.28407000  | 0.99147900  |
| H | -2.45487900 | 2.72396300  | -0.71413100 |
| H | -1.93196900 | -0.78604400 | 2.18659700  |
| H | -4.40359800 | -1.03684700 | 2.26937300  |
| H | -4.63882700 | 0.04231600  | -1.89056200 |
| H | -2.19373200 | 0.29728800  | -1.95802700 |
| C | -4.68028200 | -0.51495800 | 0.20415800  |
| O | -6.01852100 | -0.67861000 | 0.35110200  |
| C | -6.84460000 | -0.43999200 | -0.78046500 |
| H | -6.74640200 | 0.59436200  | -1.12788700 |
| H | -6.60257300 | -1.12893800 | -1.59704400 |
| H | -7.86693600 | -0.61634900 | -0.44702600 |

MeO-BODIPY in T<sub>1</sub> State

|   |             |             |             |
|---|-------------|-------------|-------------|
| C | 0.27274400  | 1.21584100  | 0.03621500  |
| N | 1.64039700  | 1.27395200  | -0.02924700 |
| B | 2.60924200  | 0.08767000  | -0.05706000 |
| N | 1.72749800  | -1.16380100 | -0.00076100 |
| C | 0.35835600  | -1.20296700 | 0.04035100  |
| C | -0.41271300 | -0.01924500 | 0.06541100  |
| C | 2.18929300  | -2.46414800 | -0.02474000 |
| C | 1.08241200  | -3.34083600 | 0.00171300  |
| C | -0.08794600 | -2.60648100 | 0.03855100  |
| C | -0.27031300 | 2.58403500  | 0.07801600  |
| C | 0.84426700  | 3.39966600  | 0.02557600  |
| C | 2.00938700  | 2.60394600  | -0.03730400 |
| C | 3.44046700  | -3.10138600 | -0.07361900 |
| C | 3.27450100  | -4.47057300 | -0.08234500 |
| S | 1.61471600  | -5.00025700 | -0.03211800 |
| S | 1.25763500  | 5.09287300  | 0.02225600  |
| C | 2.94971400  | 4.68305600  | -0.05934500 |
| C | 3.21193300  | 3.32929900  | -0.08484300 |

|   |             |             |             |
|---|-------------|-------------|-------------|
| C | -1.48090000 | -3.14127700 | 0.06730600  |
| F | 3.48924500  | 0.13235300  | 1.03979200  |
| F | 3.38618800  | 0.10067800  | -1.23036400 |
| C | -1.69531400 | 3.01885300  | 0.16414900  |
| C | -1.89971700 | -0.07247800 | 0.11589100  |
| C | -2.57245200 | -0.26588100 | 1.33151500  |
| C | -3.95782100 | -0.31930300 | 1.38240200  |
| C | -4.05655000 | 0.01740700  | -1.01539600 |
| C | -2.66082000 | 0.06736000  | -1.04454700 |
| H | 4.40516500  | -2.61032200 | -0.10149100 |
| H | 4.05823500  | -5.21728600 | -0.11632700 |
| H | 3.67790000  | 5.48436400  | -0.08600700 |
| H | 4.20874900  | 2.90910900  | -0.13370600 |
| H | -1.46190300 | -4.22279300 | -0.08993900 |
| H | -2.10634400 | -2.68967500 | -0.70819500 |
| H | -1.96737100 | -2.94608700 | 1.02902200  |
| H | -1.73982800 | 4.09907800  | 0.32555800  |
| H | -2.22225900 | 2.52485100  | 0.98559500  |
| H | -2.24303100 | 2.78887200  | -0.75599700 |
| H | -1.99788900 | -0.37592500 | 2.24799600  |
| H | -4.48063200 | -0.46876700 | 2.32224100  |
| H | -4.61405500 | 0.12917900  | -1.93804100 |
| H | -2.15766500 | 0.21756700  | -1.99672800 |
| C | -4.70802600 | -0.17770800 | 0.20628300  |
| O | -6.05551900 | -0.24333600 | 0.35053300  |
| C | -6.85472500 | -0.10920300 | -0.81662400 |
| H | -6.69886900 | 0.86598500  | -1.29095400 |
| H | -6.63991700 | -0.90840400 | -1.53448500 |
| H | -7.88878800 | -0.18943800 | -0.48220500 |

MeO-BODIPY in T<sub>2</sub> State

|   |             |             |             |
|---|-------------|-------------|-------------|
| C | 0.16222300  | 1.22502200  | 0.03806000  |
| N | 1.58609100  | 1.33508500  | -0.03793900 |
| B | 2.60141100  | 0.14545600  | -0.06363900 |
| N | 1.76910700  | -1.11731700 | 0.02063900  |
| C | 0.37122500  | -1.21608800 | 0.02366700  |
| C | -0.43217000 | -0.02642700 | 0.05241500  |
| C | 2.27198800  | -2.38408600 | 0.00122900  |
| C | 1.20797000  | -3.28776400 | -0.00995600 |
| C | -0.01174700 | -2.57266500 | -0.00652000 |
| C | -0.38411100 | 2.54549900  | 0.10810000  |
| C | 0.76363200  | 3.41291400  | 0.03784000  |
| C | 1.93576400  | 2.63778500  | -0.04659300 |

|   |             |             |             |
|---|-------------|-------------|-------------|
| C | 3.56400900  | -2.99515400 | -0.02665300 |
| C | 3.44478800  | -4.35319400 | -0.05372900 |
| S | 1.78538700  | -4.92249800 | -0.04777900 |
| S | 1.13108700  | 5.05952800  | 0.05047400  |
| C | 2.86070100  | 4.73245400  | -0.05837900 |
| C | 3.14355600  | 3.39987400  | -0.09942800 |
| C | -1.37213800 | -3.20599900 | -0.03442500 |
| F | 3.47883600  | 0.28123700  | 1.02074400  |
| F | 3.34477300  | 0.22070100  | -1.25053200 |
| C | -1.79517200 | 2.99415400  | 0.23334200  |
| C | -1.91389200 | -0.13669900 | 0.10442700  |
| C | -2.56248700 | -0.50424000 | 1.29255000  |
| C | -3.94480900 | -0.60035400 | 1.34766800  |
| C | -4.08267200 | 0.02711900  | -0.98936600 |
| C | -2.68925300 | 0.12348400  | -1.02458300 |
| H | 4.51164500  | -2.47010100 | -0.02572600 |
| H | 4.24401800  | -5.08287800 | -0.07468900 |
| H | 3.54388100  | 5.57072900  | -0.08246600 |
| H | 4.14372500  | 2.98964000  | -0.16341200 |
| H | -1.28501400 | -4.23363900 | -0.40030500 |
| H | -2.06615300 | -2.67391800 | -0.68875000 |
| H | -1.82510800 | -3.24851600 | 0.96229700  |
| H | -1.83271400 | 4.04177500  | 0.54252100  |
| H | -2.34711100 | 2.39233400  | 0.96036600  |
| H | -2.32413400 | 2.90580700  | -0.72441800 |
| H | -1.97279100 | -0.71433400 | 2.18135000  |
| H | -4.45249500 | -0.87963300 | 2.26592400  |
| H | -4.65446400 | 0.23317300  | -1.88663100 |
| H | -2.20101700 | 0.40243900  | -1.95509400 |
| C | -4.71317200 | -0.33453600 | 0.20463700  |
| O | -6.05675600 | -0.45409500 | 0.35227200  |
| C | -6.87409900 | -0.18270100 | -0.77780800 |
| H | -6.74193300 | 0.84973400  | -1.11999400 |
| H | -6.65466200 | -0.87484900 | -1.59814500 |
| H | -7.90193100 | -0.32695700 | -0.44568600 |

DMA-BODIPY in S<sub>0</sub> State

|   |             |             |             |
|---|-------------|-------------|-------------|
| C | -0.49135700 | 1.22447800  | 0.02559700  |
| N | -1.88874100 | 1.27884400  | 0.07094900  |
| B | -2.85244400 | 0.08274800  | -0.01536400 |
| N | -1.96989800 | -1.17590200 | -0.07082200 |
| C | -0.57241600 | -1.21488900 | -0.01640800 |
| C | 0.16887200  | -0.01872800 | 0.00675800  |

|   |             |             |             |
|---|-------------|-------------|-------------|
| C | -2.40983300 | -2.44702900 | -0.04135400 |
| C | -1.30806900 | -3.32398700 | 0.03461600  |
| C | -0.13396000 | -2.57909800 | 0.06806100  |
| C | 0.03798700  | 2.55627900  | -0.05216900 |
| C | -1.08391500 | 3.37832000  | -0.02393400 |
| C | -2.24239800 | 2.57691300  | 0.04184700  |
| C | -3.67814500 | -3.10683200 | -0.04579900 |
| C | -3.50081800 | -4.45583000 | 0.02254800  |
| S | -1.83324500 | -4.98375200 | 0.09577100  |
| S | -1.49641900 | 5.06972800  | -0.08465600 |
| C | -3.19607400 | 4.65449100  | -0.02547200 |
| C | -3.46379900 | 3.32030100  | 0.03816700  |
| C | 1.24172400  | -3.15185700 | 0.21044000  |
| F | -3.65376300 | 0.18034200  | -1.16521800 |
| F | -3.69785300 | 0.04089600  | 1.10535100  |
| C | 1.45035200  | 3.03512700  | -0.18282100 |
| C | 1.64584300  | -0.06894100 | 0.01124200  |
| C | 2.35147300  | -0.51968500 | -1.10947700 |
| C | 3.73818600  | -0.55390400 | -1.12162700 |
| C | 3.76088800  | 0.28342400  | 1.15100500  |
| C | 2.37485100  | 0.33915100  | 1.13323800  |
| H | -4.64417100 | -2.62050500 | -0.09585200 |
| H | -4.27840400 | -5.21031300 | 0.03240400  |
| H | -3.92089500 | 5.45978100  | -0.03907700 |
| H | -4.46078600 | 2.90010700  | 0.07954700  |
| H | 1.16956900  | -4.16979300 | 0.60346900  |
| H | 1.86171000  | -2.56091600 | 0.88835900  |
| H | 1.75927200  | -3.20032200 | -0.75274400 |
| H | 1.45093900  | 4.05243100  | -0.58404100 |
| H | 2.03782500  | 2.39863800  | -0.84836100 |
| H | 1.95848500  | 3.05725300  | 0.78641500  |
| H | 1.80522000  | -0.83178900 | -1.99641100 |
| H | 4.24232800  | -0.88600200 | -2.02090800 |
| H | 4.28200800  | 0.59867100  | 2.04668500  |
| H | 1.84702400  | 0.69798500  | 2.01359000  |
| C | 4.48473900  | -0.16934000 | 0.01992400  |
| C | 6.56392300  | -0.49701000 | -1.21101700 |
| H | 6.35954700  | 0.27034000  | -1.97127900 |
| H | 7.63456600  | -0.50861900 | -1.00914000 |
| H | 6.28914900  | -1.47342100 | -1.62256100 |
| N | 5.85490000  | -0.23720100 | 0.03052600  |
| C | 6.58838100  | 0.35263600  | 1.13736400  |
| H | 7.65421800  | 0.19045700  | 0.97924300  |
| H | 6.40697600  | 1.43349100  | 1.22479400  |

|   |            |             |            |
|---|------------|-------------|------------|
| H | 6.31437400 | -0.12211000 | 2.08471300 |
|---|------------|-------------|------------|

DMA-BODIPY in S<sub>1</sub> State

|   |             |             |             |
|---|-------------|-------------|-------------|
| C | -0.50435600 | 1.22436000  | 0.01152000  |
| N | -1.88696300 | 1.27708200  | 0.04261000  |
| B | -2.85215800 | 0.08626500  | 0.00467500  |
| N | -1.97150600 | -1.16796100 | -0.03998000 |
| C | -0.58888400 | -1.21163500 | 0.00244100  |
| C | 0.17864800  | -0.01883900 | 0.01118100  |
| C | -2.43003900 | -2.45436100 | -0.02599900 |
| C | -1.32277500 | -3.33558000 | 0.02632600  |
| C | -0.14957800 | -2.60490700 | 0.05730200  |
| C | 0.03117600  | 2.58341700  | -0.04640500 |
| C | -1.08848900 | 3.39425100  | -0.02972900 |
| C | -2.25487100 | 2.59229100  | 0.01819000  |
| C | -3.68440000 | -3.09828600 | -0.03288700 |
| C | -3.51735000 | -4.46431800 | 0.00847300  |
| S | -1.85891100 | -4.99685300 | 0.05865500  |
| S | -1.50786600 | 5.08872700  | -0.07631700 |
| C | -3.19940500 | 4.67278800  | -0.03665700 |
| C | -3.46148300 | 3.32201900  | 0.01137700  |
| C | 1.23476000  | -3.15500300 | 0.15492900  |
| F | -3.68330100 | 0.15519300  | -1.12825200 |
| F | -3.67819300 | 0.07393100  | 1.14363500  |
| C | 1.45223200  | 3.03237300  | -0.13240300 |
| C | 1.66027000  | -0.07291900 | 0.01410700  |
| C | 2.37285100  | -0.42711100 | -1.13649800 |
| C | 3.76126300  | -0.48053000 | -1.14595800 |
| C | 3.78296700  | 0.17708800  | 1.17939100  |
| C | 2.39459400  | 0.23202700  | 1.16513400  |
| H | -4.65042900 | -2.60960900 | -0.06558700 |
| H | -4.30300200 | -5.21085600 | 0.00986700  |
| H | -3.93085800 | 5.47249200  | -0.04922700 |
| H | -4.45959400 | 2.90233700  | 0.03870600  |
| H | 1.18880600  | -4.21161400 | 0.43310800  |
| H | 1.83213900  | -2.62447500 | 0.90204600  |
| H | 1.77062200  | -3.07978000 | -0.79817600 |
| H | 1.48570300  | 4.09098700  | -0.40424000 |
| H | 2.01420400  | 2.46407400  | -0.87938900 |
| H | 1.97485200  | 2.91219400  | 0.82338400  |
| H | 1.83007000  | -0.65834500 | -2.05031100 |
| H | 4.26467800  | -0.74764700 | -2.06722300 |
| H | 4.30291800  | 0.42348200  | 2.09724700  |

|   |            |             |             |
|---|------------|-------------|-------------|
| H | 1.86884800 | 0.51838800  | 2.07328200  |
| C | 4.50689000 | -0.19475200 | 0.02203100  |
| C | 6.58738900 | -0.39040000 | -1.23298800 |
| H | 6.39133000 | 0.46851200  | -1.89216600 |
| H | 7.65825700 | -0.44088600 | -1.03626200 |
| H | 6.30264400 | -1.30456300 | -1.76229400 |
| N | 5.88351200 | -0.28414700 | 0.03413300  |
| C | 6.61000700 | 0.28250900  | 1.15802300  |
| H | 7.67687300 | 0.12204500  | 1.00271300  |
| H | 6.42921200 | 1.36209300  | 1.27044700  |
| H | 6.33161500 | -0.21396400 | 2.09209300  |

DMA-BODIPY in T<sub>1</sub> State

|   |             |             |             |
|---|-------------|-------------|-------------|
| C | 0.51339600  | 1.21539500  | 0.00239400  |
| N | 1.88294700  | 1.27638100  | -0.00900800 |
| B | 2.85407400  | 0.09222900  | 0.00359800  |
| N | 1.97327600  | -1.16078100 | 0.01335600  |
| C | 0.60335000  | -1.20173900 | 0.00277000  |
| C | -0.17189200 | -0.02017300 | 0.00285500  |
| C | 2.43768700  | -2.46043800 | 0.00150800  |
| C | 1.33193800  | -3.33861000 | -0.01673000 |
| C | 0.15979400  | -2.60618000 | -0.02020500 |
| C | -0.03304100 | 2.58277800  | 0.02376300  |
| C | 1.08139100  | 3.40038200  | 0.01672400  |
| C | 2.24947400  | 2.60688400  | -0.00058600 |
| C | 3.69076000  | -3.09604200 | -0.00273100 |
| C | 3.52745100  | -4.46541500 | -0.02267800 |
| S | 1.86742000  | -4.99716800 | -0.03705700 |
| S | 1.49135100  | 5.09427100  | 0.03201100  |
| C | 3.18638200  | 4.68781300  | 0.01790800  |
| C | 3.45171200  | 3.33463200  | 0.00123300  |
| C | -1.23230100 | -3.14307100 | -0.04409600 |
| F | 3.68179100  | 0.13396200  | 1.14124900  |
| F | 3.68625100  | 0.11144900  | -1.13131500 |
| C | -1.46096900 | 3.01508500  | 0.05183000  |
| C | -1.65873400 | -0.07779000 | -0.00141100 |
| C | -2.38179000 | -0.26356600 | 1.18082400  |
| C | -3.77096800 | -0.32385800 | 1.18781400  |
| C | -3.77554800 | -0.00058600 | -1.20546400 |
| C | -2.38636800 | 0.05600600  | -1.18794200 |
| H | 4.65511000  | -2.60356600 | 0.00760100  |
| H | 4.31297600  | -5.21096200 | -0.02914400 |
| H | 3.91351400  | 5.49050800  | 0.02180400  |



|   |             |             |             |
|---|-------------|-------------|-------------|
| H | 4.45038900  | 2.91608500  | -0.00844700 |
| H | -1.20549300 | -4.22555800 | -0.19405100 |
| H | -1.82681700 | -2.69606400 | -0.84621200 |
| H | -1.75732500 | -2.94166800 | 0.89573100  |
| H | -1.51371500 | 4.09633900  | 0.20453900  |
| H | -2.01820300 | 2.52406300  | 0.85493700  |
| H | -1.97248100 | 2.77735100  | -0.88697800 |
| H | -1.84629500 | -0.35973500 | 2.12288000  |
| H | -4.28047800 | -0.46106500 | 2.13391900  |
| H | -4.28821400 | 0.11514600  | -2.15267100 |
| H | -1.85449000 | 0.21233300  | -2.12397900 |
| C | -4.50784500 | -0.20943500 | -0.01381500 |
| C | -6.59734500 | -0.22498600 | 1.24050100  |
| H | -6.41328800 | 0.72654200  | 1.76200400  |
| H | -7.66649300 | -0.31554500 | 1.04807700  |
| H | -6.30879500 | -1.04492500 | 1.90437300  |
| N | -5.88607800 | -0.30813100 | -0.02430500 |
| C | -6.60355600 | 0.11285200  | -1.21618600 |
| H | -7.67132300 | -0.03344400 | -1.05269900 |
| H | -6.42632000 | 1.17165000  | -1.45880500 |
| H | -6.31420500 | -0.49287700 | -2.07951600 |

DMA-BODIPY in T<sub>2</sub> State

|   |             |             |             |
|---|-------------|-------------|-------------|
| C | -0.49539000 | -1.24295100 | -0.03989000 |
| N | -1.87765600 | -1.21792300 | -0.17216200 |
| B | -2.78497900 | 0.00030500  | 0.00023200  |
| N | -1.87733200 | 1.21835200  | 0.17213800  |
| C | -0.49506200 | 1.24298400  | 0.03983500  |
| C | 0.23602000  | -0.00008800 | -0.00000700 |
| C | -2.32331800 | 2.51236600  | 0.12940800  |
| C | -1.22959100 | 3.36023600  | -0.04479100 |
| C | -0.05703900 | 2.58729700  | -0.14546900 |
| C | -0.05773800 | -2.58741800 | 0.14535000  |
| C | -1.23048900 | -3.36002700 | 0.04459500  |
| C | -2.32398200 | -2.51183000 | -0.12953000 |
| C | -3.58114000 | 3.17960000  | 0.18115300  |
| C | -3.41104200 | 4.53033600  | 0.05260300  |
| S | -1.73992300 | 5.02002800  | -0.13639400 |
| S | -1.74127000 | -5.01969000 | 0.13607700  |
| C | -3.41224900 | -4.52950200 | -0.05286200 |
| C | -3.58198000 | -3.17870400 | -0.18130500 |
| C | 1.28813500  | 3.14157700  | -0.50611200 |
| F | -3.62790700 | -0.16306700 | 1.12470500  |

|   |             |             |             |
|---|-------------|-------------|-------------|
| F | -3.62847900 | 0.16381000  | -1.12378000 |
| C | 1.28727300  | -3.14209200 | 0.50598300  |
| C | 1.66755600  | -0.00026300 | 0.00005300  |
| C | 2.41986300  | 0.80709100  | 0.92240100  |
| C | 3.78071000  | 0.79656600  | 0.94297600  |
| C | 3.78061700  | -0.79739200 | -0.94282200 |
| C | 2.41976800  | -0.80776000 | -0.92225100 |
| H | -4.54559900 | 2.70144400  | 0.30363100  |
| H | -4.17910700 | 5.29310000  | 0.06125900  |
| H | -4.18053000 | -5.29204800 | -0.06156800 |
| H | -4.54630800 | -2.70026900 | -0.30373100 |
| H | 1.15057500  | 4.07830000  | -1.05597700 |
| H | 1.85377100  | 2.46397800  | -1.15113900 |
| H | 1.90930600  | 3.36688900  | 0.36862500  |
| H | 1.14943900  | -4.07877200 | 1.05585200  |
| H | 1.85311600  | -2.46465900 | 1.15100000  |
| H | 1.90835900  | -3.36759400 | -0.36876400 |
| H | 1.87697500  | 1.39589200  | 1.65452200  |
| H | 4.30424700  | 1.37798400  | 1.69195100  |
| H | 4.30409000  | -1.37894500 | -1.69173700 |
| H | 1.87681800  | -1.39652200 | -1.65435600 |
| C | 4.52241600  | -0.00041600 | 0.00004300  |
| C | 6.61503100  | 0.86246300  | 0.91219300  |
| H | 6.47431500  | 0.53202000  | 1.94529700  |
| H | 7.66972700  | 0.79997900  | 0.65740300  |
| H | 6.28342800  | 1.89756600  | 0.81058700  |
| N | 5.86107200  | -0.00044800 | -0.00001500 |
| C | 6.61486700  | -0.86355100 | -0.91218000 |
| H | 7.66966000  | -0.80065600 | -0.65789700 |
| H | 6.28357700  | -1.89870200 | -0.80997100 |
| H | 6.47359300  | -0.53361300 | -1.94536300 |

SBDPiR690 in S<sub>0</sub> State

|   |             |             |             |
|---|-------------|-------------|-------------|
| C | -4.59503500 | -0.78783000 | -0.02054900 |
| C | -3.23864600 | -0.99869200 | -0.01839500 |
| C | -2.53866500 | 0.23511200  | -0.02033900 |
| C | -3.37974500 | 1.38181300  | -0.02049000 |
| S | -5.05570300 | 0.92093300  | -0.03017500 |
| N | -1.25112500 | 0.61935000  | -0.01125500 |
| C | -1.23332900 | 2.01629500  | -0.00958200 |
| C | -2.58220700 | 2.50332400  | -0.01525700 |
| B | -0.02936000 | -0.33395000 | -0.00587300 |
| N | 1.21456700  | 0.58144300  | 0.00668500  |

|   |             |             |             |
|---|-------------|-------------|-------------|
| C | 1.20610400  | 1.97172300  | 0.00744200  |
| C | -0.00347600 | 2.67558600  | -0.00101800 |
| C | 0.10475000  | 4.18552600  | 0.00058600  |
| F | -1.07561000 | 4.81273700  | -0.00986800 |
| F | 0.78760000  | 4.62085600  | -1.07273700 |
| F | 0.76824800  | 4.61980200  | 1.08629800  |
| F | -0.03794100 | -1.13967200 | -1.14696900 |
| F | -0.05360100 | -1.14808200 | 1.12897900  |
| C | 2.50372200  | 0.19193000  | 0.01834100  |
| C | 3.34656900  | 1.33560600  | 0.02301600  |
| C | 2.54715100  | 2.46044600  | 0.01757300  |
| C | 3.20063300  | -1.04397200 | 0.01604100  |
| C | 4.55748800  | -0.83792700 | 0.02216100  |
| S | 5.02063300  | 0.86963400  | 0.03589100  |
| C | 5.60503700  | -1.86640200 | 0.02973700  |
| C | 5.33218800  | -3.13729800 | 0.56068600  |
| C | 6.31215900  | -4.12411500 | 0.56215400  |
| C | 7.57985600  | -3.85776200 | 0.04235100  |
| C | 7.86175200  | -2.59591500 | -0.48028400 |
| C | 6.88299300  | -1.60645700 | -0.48765900 |
| C | -5.64568200 | -1.81253900 | -0.02732300 |
| C | -6.92240200 | -1.54726700 | 0.49064900  |
| C | -7.90481900 | -2.53287400 | 0.48353600  |
| C | -7.62777300 | -3.79546000 | -0.04003500 |
| C | -6.36142800 | -4.06688100 | -0.56051700 |
| C | -5.37734200 | -3.08427700 | -0.55856800 |
| H | -2.77620900 | -1.97726100 | 0.01172000  |
| H | -2.88943900 | 3.53634100  | -0.01424900 |
| H | 2.84450100  | 3.49926000  | 0.02021100  |
| H | 2.73576900  | -2.02136100 | -0.01706900 |
| H | 4.35716000  | -3.34403000 | 0.99108800  |
| H | 6.08842500  | -5.10079100 | 0.97997700  |
| H | 8.34413900  | -4.62875700 | 0.04757300  |
| H | 8.84394000  | -2.38146500 | -0.88976300 |
| H | 7.11008200  | -0.63511700 | -0.91885700 |
| H | -7.14568800 | -0.57519400 | 0.92217300  |
| H | -8.88596300 | -2.31493800 | 0.89357300  |
| H | -8.39512700 | -4.56339100 | -0.04541300 |
| H | -6.14194100 | -5.04424200 | -0.97888300 |
| H | -4.40320700 | -3.29485700 | -0.98905300 |

SBDPiR690 in S<sub>1</sub> State

|   |             |             |             |
|---|-------------|-------------|-------------|
| C | -4.60983600 | -0.79166100 | -0.01445500 |
|---|-------------|-------------|-------------|

|   |             |             |             |
|---|-------------|-------------|-------------|
| C | -3.23069600 | -0.98832700 | -0.01442100 |
| C | -2.54692300 | 0.22963300  | -0.01306700 |
| C | -3.38668700 | 1.38064200  | -0.01113400 |
| S | -5.06226000 | 0.91979600  | -0.01507100 |
| N | -1.24466300 | 0.63163300  | -0.00655500 |
| C | -1.23542700 | 2.01659000  | -0.00497300 |
| C | -2.59491100 | 2.50507000  | -0.00761100 |
| B | -0.03122700 | -0.31841700 | -0.00335400 |
| N | 1.20861800  | 0.59276200  | 0.00293900  |
| C | 1.21055100  | 1.97088800  | 0.00353800  |
| C | -0.00094700 | 2.69890900  | -0.00066300 |
| C | 0.11092100  | 4.18932400  | 0.00021800  |
| F | -1.07237500 | 4.81800900  | -0.00630700 |
| F | 0.79528900  | 4.64571200  | -1.07298500 |
| F | 0.78345800  | 4.64551100  | 1.08091300  |
| F | -0.04136600 | -1.13611400 | -1.14104400 |
| F | -0.04969600 | -1.13958600 | 1.13171800  |
| C | 2.51037500  | 0.18375300  | 0.01060400  |
| C | 3.35574500  | 1.33223400  | 0.01144000  |
| C | 2.56597500  | 2.45931800  | 0.00882800  |
| C | 3.18817500  | -1.03647000 | 0.01210200  |
| C | 4.56899100  | -0.84622900 | 0.01513300  |
| S | 5.02890900  | 0.86262700  | 0.01770200  |
| C | 5.59522400  | -1.87157200 | 0.01877300  |
| C | 5.26232400  | -3.21263500 | 0.30763900  |
| C | 6.23970700  | -4.19781300 | 0.30777900  |
| C | 7.56934900  | -3.87457700 | 0.02531900  |
| C | 7.91446500  | -2.55118500 | -0.25697200 |
| C | 6.94213700  | -1.56034100 | -0.26083100 |
| C | -5.64178500 | -1.81168300 | -0.01658400 |
| C | -6.98583100 | -1.49388400 | 0.26868600  |
| C | -7.96378200 | -2.47929300 | 0.26475100  |
| C | -7.62699300 | -3.80357300 | -0.02313600 |
| C | -6.30005400 | -4.13323700 | -0.31079900 |
| C | -5.31714700 | -3.15347300 | -0.31051900 |
| H | -2.75719600 | -1.96185700 | 0.00723000  |
| H | -2.89987400 | 3.53834800  | -0.00540600 |
| H | 2.86366600  | 3.49746600  | 0.00922100  |
| H | 2.71006600  | -2.00765900 | -0.01153100 |
| H | 4.23970600  | -3.47921200 | 0.55273000  |
| H | 5.96571000  | -5.22291500 | 0.53669900  |
| H | 8.33099100  | -4.64815000 | 0.02738100  |
| H | 8.94458500  | -2.29205000 | -0.48017900 |
| H | 7.23036800  | -0.54069500 | -0.50169800 |

|   |             |             |             |
|---|-------------|-------------|-------------|
| H | -7.26740400 | -0.47344600 | 0.51412000  |
| H | -8.99170300 | -2.21512500 | 0.49220600  |
| H | -8.39298900 | -4.57283900 | -0.02556400 |
| H | -6.03249100 | -5.15907900 | -0.54401900 |
| H | -4.29666500 | -3.42447900 | -0.55973400 |

SBDPiR690 in S<sub>2</sub> State

|   |             |             |             |
|---|-------------|-------------|-------------|
| C | -4.57721700 | -0.82527300 | -0.02286800 |
| C | -3.21021200 | -1.00594500 | -0.02005100 |
| C | -2.53278600 | 0.24606100  | -0.02410600 |
| C | -3.37486400 | 1.36657000  | -0.02658200 |
| S | -5.00595400 | 0.88585300  | -0.03781300 |
| N | -1.24608300 | 0.66979500  | -0.01307300 |
| C | -1.23933200 | 2.07566700  | -0.01086000 |
| C | -2.56989700 | 2.53032600  | -0.01880300 |
| B | -0.02011500 | -0.29007500 | -0.00497000 |
| N | 1.20659200  | 0.62136700  | 0.00685900  |
| C | 1.21730800  | 2.01723700  | 0.00706100  |
| C | 0.00693700  | 2.74705700  | -0.00128900 |
| C | 0.11399600  | 4.23251800  | 0.00084000  |
| F | -1.07688800 | 4.85448800  | -0.00745700 |
| F | 0.79593500  | 4.70343500  | -1.06999400 |
| F | 0.78001500  | 4.70146400  | 1.08241900  |
| F | -0.05314200 | -1.09976800 | -1.14328300 |
| F | -0.07081400 | -1.10386700 | 1.12973800  |
| C | 2.50106500  | 0.19843700  | 0.01896400  |
| C | 3.34703600  | 1.32025800  | 0.02340900  |
| C | 2.55064400  | 2.47590800  | 0.01680900  |
| C | 3.17677900  | -1.05011000 | 0.01688000  |
| C | 4.54037400  | -0.87317800 | 0.02268500  |
| S | 4.99822200  | 0.83526000  | 0.03401700  |
| C | 5.58031800  | -1.90776100 | 0.03099100  |
| C | 5.29505500  | -3.18299400 | 0.54604000  |
| C | 6.26676400  | -4.17820500 | 0.54535300  |
| C | 7.54316400  | -3.91750200 | 0.04414300  |
| C | 7.83880800  | -2.65148200 | -0.46021600 |
| C | 6.86652200  | -1.65524300 | -0.47031400 |
| C | -5.63027400 | -1.84486100 | -0.02609000 |
| C | -6.89824400 | -1.58537800 | 0.51549900  |
| C | -7.88330600 | -2.56859100 | 0.50574200  |
| C | -7.61584100 | -3.82543800 | -0.03615800 |
| C | -6.35597300 | -4.09213600 | -0.57412000 |
| C | -5.37092900 | -3.11018200 | -0.57645200 |

|   |             |             |             |
|---|-------------|-------------|-------------|
| H | -2.72917300 | -1.97648000 | 0.00805900  |
| H | -2.90354500 | 3.55510200  | -0.01781000 |
| H | 2.86993800  | 3.50757500  | 0.01853400  |
| H | 2.69441200  | -2.01975800 | -0.01224400 |
| H | 4.31438600  | -3.38695500 | 0.96503100  |
| H | 6.02963800  | -5.15771800 | 0.94934500  |
| H | 8.30150100  | -4.69426600 | 0.04958300  |
| H | 8.82727900  | -2.43860200 | -0.85558400 |
| H | 7.10701500  | -0.68196200 | -0.89008100 |
| H | -7.11475800 | -0.62106300 | 0.96860700  |
| H | -8.85821400 | -2.35389800 | 0.93212800  |
| H | -8.38423800 | -4.59216200 | -0.04040800 |
| H | -6.14208300 | -5.06523200 | -1.00524300 |
| H | -4.40276400 | -3.31648400 | -1.02268100 |

SBDPiR690 in T<sub>1</sub> State

|   |             |             |             |
|---|-------------|-------------|-------------|
| C | -4.61562400 | -0.78600200 | -0.02324600 |
| C | -3.23496800 | -0.98401700 | -0.02058200 |
| C | -2.55563100 | 0.23065800  | -0.02438500 |
| C | -3.39160800 | 1.38344700  | -0.02957700 |
| S | -5.06677400 | 0.92432800  | -0.03750000 |
| N | -1.24285000 | 0.63734400  | -0.01318500 |
| C | -1.23175100 | 2.00995100  | -0.01366000 |
| C | -2.59812500 | 2.50344800  | -0.02454400 |
| B | -0.03299200 | -0.31544600 | -0.00480600 |
| N | 1.20574900  | 0.59752900  | 0.00970500  |
| C | 1.20735900  | 1.96244700  | 0.01227700  |
| C | 0.00013500  | 2.69970300  | -0.00129200 |
| C | 0.11506500  | 4.18157600  | -0.00079100 |
| F | -1.06875600 | 4.81329400  | -0.01767200 |
| F | 0.81102100  | 4.64808900  | -1.06735900 |
| F | 0.78164100  | 4.64999100  | 1.08345000  |
| F | -0.03593700 | -1.13057700 | -1.14371600 |
| F | -0.05691900 | -1.13738300 | 1.12892200  |
| C | 2.51811300  | 0.18229600  | 0.02356700  |
| C | 3.36108300  | 1.33290600  | 0.03288100  |
| C | 2.57142300  | 2.45538700  | 0.02775400  |
| C | 3.18973000  | -1.03404800 | 0.01933600  |
| C | 4.57348200  | -0.84315200 | 0.02547400  |
| S | 5.03364400  | 0.86387700  | 0.04389600  |
| C | 5.60114300  | -1.87463600 | 0.02044500  |
| C | 5.27180500  | -3.20281900 | 0.35375600  |
| C | 6.24607500  | -4.19284000 | 0.34663000  |

|   |             |             |             |
|---|-------------|-------------|-------------|
| C | 7.56562500  | -3.88179300 | 0.01196800  |
| C | 7.90499200  | -2.56856100 | -0.31627200 |
| C | 6.93479600  | -1.57367500 | -0.31307300 |
| C | -5.65044300 | -1.81170700 | -0.01831500 |
| C | -6.98093200 | -1.50383700 | 0.32009900  |
| C | -7.95765000 | -2.49265900 | 0.32275000  |
| C | -7.62774100 | -3.80687400 | -0.01055300 |
| C | -6.31103100 | -4.12474100 | -0.34986800 |
| C | -5.33061600 | -3.14058800 | -0.35682300 |
| H | -2.76522500 | -1.95910700 | 0.00723800  |
| H | -2.89700900 | 3.53805800  | -0.02530600 |
| H | 2.86361000  | 3.49463500  | 0.03163500  |
| H | 2.71491400  | -2.00655700 | -0.01167000 |
| H | 4.25595300  | -3.45681600 | 0.63810600  |
| H | 5.97651000  | -5.21061300 | 0.61061600  |
| H | 8.32455800  | -4.65792000 | 0.00863000  |
| H | 8.92751300  | -2.31898100 | -0.58119100 |
| H | 7.21565100  | -0.56153000 | -0.59174400 |
| H | -7.25465100 | -0.49077900 | 0.60250800  |
| H | -8.97783300 | -2.23723400 | 0.59124200  |
| H | -8.39153300 | -4.57822800 | -0.00771200 |
| H | -6.04835800 | -5.14331100 | -0.61783600 |
| H | -4.31703800 | -3.39972200 | -0.64482000 |

SBDPiR690 in T<sub>2</sub> State

|   |             |             |             |
|---|-------------|-------------|-------------|
| C | 4.57381300  | -0.83412300 | 0.02368900  |
| C | 3.21038600  | -1.01068100 | 0.02253500  |
| C | 2.53865700  | 0.24388300  | 0.03019100  |
| C | 3.38732400  | 1.36160100  | 0.03467700  |
| S | 5.00505100  | 0.88336100  | 0.04183800  |
| N | 1.25524600  | 0.67204900  | 0.01775100  |
| C | 1.23707300  | 2.08937500  | 0.01544200  |
| C | 2.58632100  | 2.54553400  | 0.02630200  |
| B | 0.01071400  | -0.29490300 | 0.00713300  |
| N | -1.20885200 | 0.61153800  | -0.00585300 |
| C | -1.21758500 | 2.00219600  | -0.00839700 |
| C | 0.00705800  | 2.73468500  | 0.00230600  |
| C | -0.10291200 | 4.22632400  | -0.00200400 |
| F | 1.08849200  | 4.84784000  | 0.00812200  |
| F | -0.78369800 | 4.68900200  | 1.06783600  |
| F | -0.76301000 | 4.68423000  | -1.08665700 |
| F | 0.07140800  | -1.09657900 | 1.14671100  |
| F | 0.09246400  | -1.09909200 | -1.12935800 |

|   |             |             |             |
|---|-------------|-------------|-------------|
| C | -2.50965400 | 0.19650100  | -0.01970500 |
| C | -3.34638500 | 1.31897500  | -0.02809800 |
| C | -2.54077700 | 2.47133100  | -0.02169600 |
| C | -3.19443100 | -1.05006000 | -0.01626600 |
| C | -4.55309500 | -0.86423700 | -0.02486800 |
| S | -5.00952400 | 0.84438500  | -0.04047400 |
| C | -5.59727900 | -1.89828800 | -0.03261400 |
| C | -5.32525300 | -3.16614000 | -0.57122000 |
| C | -6.29915300 | -4.15981100 | -0.56850400 |
| C | -7.56649300 | -3.90383400 | -0.04272400 |
| C | -7.84988100 | -2.64439000 | 0.48439900  |
| C | -6.87421100 | -1.65086700 | 0.49319600  |
| C | 5.63193000  | -1.85041600 | 0.02631700  |
| C | 6.88686000  | -1.59743800 | -0.54611600 |
| C | 7.87456700  | -2.57848800 | -0.53842900 |
| C | 7.62098800  | -3.82540100 | 0.03173200  |
| C | 6.37316400  | -4.08502500 | 0.60018900  |
| C | 5.38619000  | -3.10476600 | 0.60552300  |
| H | 2.72492700  | -1.97886500 | -0.00597100 |
| H | 2.93044600  | 3.56611800  | 0.02644300  |
| H | -2.85249000 | 3.50516900  | -0.02616400 |
| H | -2.71973800 | -2.02346400 | 0.01643400  |
| H | -4.35198900 | -3.36548000 | -1.00962300 |
| H | -6.07111200 | -5.13388800 | -0.99076300 |
| H | -8.32700400 | -4.67855900 | -0.04712100 |
| H | -8.83130100 | -2.43446100 | 0.89876400  |
| H | -7.10340400 | -0.68264000 | 0.93050500  |
| H | 7.09172900  | -0.64137800 | -1.02187200 |
| H | 8.84010600  | -2.36965100 | -0.98837400 |
| H | 8.39122800  | -4.59027300 | 0.03454900  |
| H | 6.17047000  | -5.05061700 | 1.05303200  |
| H | 4.42713800  | -3.30380000 | 1.07436900  |

SBDPiR688 in S<sub>0</sub> State

|   |             |            |             |
|---|-------------|------------|-------------|
| C | -4.59932400 | 0.22058900 | -0.01339600 |
| C | -3.24486500 | 0.00434100 | -0.02763700 |
| C | -2.54250100 | 1.23788900 | -0.03995900 |
| C | -3.38267500 | 2.38493000 | -0.03522600 |
| S | -5.05901300 | 1.92776000 | -0.02420100 |
| N | -1.25481600 | 1.62024900 | -0.04391200 |
| C | -1.23640100 | 3.01686500 | -0.04565500 |
| C | -2.58420100 | 3.50600900 | -0.04091500 |
| B | -0.03268400 | 0.66597800 | -0.05288000 |



|   |             |             |             |
|---|-------------|-------------|-------------|
| N | 1.21137600  | 1.58233600  | -0.03200900 |
| C | 1.20297400  | 2.97221200  | -0.03148900 |
| C | -0.00650200 | 3.67622800  | -0.04235900 |
| C | 0.10217800  | 5.18707900  | -0.04256000 |
| F | -1.07767000 | 5.81381700  | -0.07037000 |
| F | 0.79923500  | 5.61809300  | -1.10768100 |
| F | 0.75137900  | 5.62137500  | 1.05109700  |
| F | -0.04323300 | -0.12408600 | -1.20430600 |
| F | -0.05442900 | -0.16035000 | 1.07163700  |
| C | 2.50037200  | 1.19396000  | -0.01765100 |
| C | 3.34292500  | 2.33758600  | -0.00250000 |
| C | 2.54324100  | 3.46237500  | -0.01271700 |
| C | 3.19839900  | -0.04202400 | -0.00582900 |
| C | 4.55356700  | 0.16825900  | 0.01696500  |
| S | 5.01696600  | 1.87414300  | 0.01883200  |
| C | 5.60178200  | -0.86057100 | 0.02659000  |
| C | 5.34949400  | -2.11737100 | -0.54122800 |
| C | 6.32782400  | -3.10525200 | -0.53443900 |
| C | 7.56946900  | -2.83722100 | 0.03645800  |
| C | 7.84038000  | -1.59034600 | 0.60107100  |
| C | 6.85986000  | -0.60803900 | 0.59640100  |
| C | 8.65693400  | -3.87189000 | 0.03307700  |
| F | 8.23424900  | -5.06875600 | -0.40505600 |
| F | 9.17537500  | -4.06394200 | 1.26274100  |
| F | 9.69106900  | -3.51134500 | -0.75608400 |
| C | -5.65106600 | -0.80430800 | 0.00382700  |
| C | -6.90749800 | -0.54089700 | 0.56502300  |
| C | -7.89413500 | -1.52166300 | 0.58434000  |
| C | -7.62485700 | -2.77320600 | 0.03915900  |
| C | -6.37903000 | -3.05299500 | -0.52632000 |
| C | -5.39891500 | -2.07190100 | -0.54698800 |
| C | -8.65976100 | -3.86039600 | 0.06135900  |
| F | -9.85429300 | -3.43154000 | 0.49975500  |
| F | -8.29518100 | -4.88425600 | 0.86136700  |
| F | -8.85783700 | -4.39348500 | -1.16096800 |
| H | -2.78440800 | -0.97539000 | 0.00035100  |
| H | -2.89041100 | 4.53931000  | -0.03857400 |
| H | 2.84015700  | 4.50127400  | -0.00536900 |
| H | 2.73441800  | -1.02035500 | 0.01368300  |
| H | 4.39167100  | -2.31852700 | -1.00967200 |
| H | 6.12502000  | -4.07300700 | -0.98013200 |
| H | 8.80961600  | -1.38971300 | 1.04806800  |
| H | 7.07010900  | 0.35184500  | 1.05914700  |
| H | -7.11737500 | 0.42629700  | 1.01246200  |

|   |             |             |             |
|---|-------------|-------------|-------------|
| H | -8.86157000 | -1.31014900 | 1.02643000  |
| H | -6.18040100 | -4.02976000 | -0.95765700 |
| H | -4.44054700 | -2.28142400 | -1.01058600 |

SBDPiR688 in S<sub>1</sub> State

|   |             |             |             |
|---|-------------|-------------|-------------|
| C | -4.61160400 | 0.21806100  | -0.00843900 |
| C | -3.23378500 | 0.01662300  | -0.00513200 |
| C | -2.54831700 | 1.23359200  | -0.01354300 |
| C | -3.38829300 | 2.38587700  | -0.02331000 |
| S | -5.06413500 | 1.92742200  | -0.02636400 |
| N | -1.24633500 | 1.63402500  | -0.00866600 |
| C | -1.23672600 | 3.01836400  | -0.01960800 |
| C | -2.59697100 | 3.50893500  | -0.02875400 |
| B | -0.03210500 | 0.68260700  | 0.00071900  |
| N | 1.20752700  | 1.59659100  | 0.00079900  |
| C | 1.20805200  | 2.97377900  | -0.00981600 |
| C | -0.00331400 | 3.70136800  | -0.02025500 |
| C | 0.10863900  | 5.19326100  | -0.03497200 |
| F | -1.07450000 | 5.82073500  | -0.04548700 |
| F | 0.79079200  | 5.63538300  | -1.11425600 |
| F | 0.78320000  | 5.65710900  | 1.03986700  |
| F | -0.04155100 | -0.13936500 | -1.13220100 |
| F | -0.05008200 | -0.12840500 | 1.14084500  |
| C | 2.50951700  | 1.19006700  | 0.00265900  |
| C | 3.35422400  | 2.34046700  | -0.00158400 |
| C | 2.56400700  | 3.46553600  | -0.01039300 |
| C | 3.18952000  | -0.02856400 | 0.01165600  |
| C | 4.56908500  | 0.16736700  | 0.01307600  |
| S | 5.02807100  | 1.87414400  | 0.00194000  |
| C | 5.59714200  | -0.85806100 | 0.01819700  |
| C | 5.26843000  | -2.19607600 | -0.27820500 |
| C | 6.24309500  | -3.18386600 | -0.27328600 |
| C | 7.56325200  | -2.84918600 | 0.02411200  |
| C | 7.91427600  | -1.52872600 | 0.31521800  |
| C | 6.94063400  | -0.54379300 | 0.31340400  |
| C | 8.64319800  | -3.89158100 | 0.01056000  |
| F | 8.15977600  | -5.13759500 | -0.11478300 |
| F | 9.38196900  | -3.86630900 | 1.13783800  |
| F | 9.50916700  | -3.70504300 | -1.00815100 |
| C | -5.64511200 | -0.80228100 | -0.00018800 |
| C | -6.98500900 | -0.48030300 | 0.28959200  |
| C | -7.96861900 | -1.45995700 | 0.29497700  |
| C | -7.62494100 | -2.77968500 | 0.01062600  |

|   |             |             |             |
|---|-------------|-------------|-------------|
| C | -6.30172500 | -3.12397900 | -0.28034100 |
| C | -5.32178800 | -2.14594500 | -0.28904100 |
| C | -8.66081600 | -3.86562000 | 0.02973000  |
| F | -9.90952200 | -3.38899800 | 0.15584400  |
| F | -8.46741800 | -4.72742300 | 1.05056500  |
| F | -8.63356400 | -4.60759600 | -1.09546000 |
| H | -2.76156900 | -0.95731600 | 0.02658300  |
| H | -2.90076800 | 4.54255900  | -0.03620900 |
| H | 2.85962700  | 4.50430100  | -0.01569200 |
| H | 2.71340900  | -1.00067800 | 0.03980500  |
| H | 4.25026700  | -2.46625200 | -0.53494700 |
| H | 5.97575200  | -4.20881500 | -0.50635700 |
| H | 8.94397600  | -1.27452300 | 0.54814800  |
| H | 7.22735900  | 0.47357700  | 0.56301900  |
| H | -7.26722500 | 0.54005000  | 0.53191700  |
| H | -8.99544900 | -1.19584100 | 0.52304800  |
| H | -6.04250800 | -4.15369600 | -0.50800700 |
| H | -4.30438000 | -2.42227700 | -0.54227700 |

SBDPiR688 in S<sub>2</sub> State

|   |             |             |             |
|---|-------------|-------------|-------------|
| C | -4.52724928 | 0.17597538  | -0.03924832 |
| C | -3.17215323 | 0.01899700  | 0.15222883  |
| C | -2.50272471 | 1.26851519  | 0.08411093  |
| C | -3.34158163 | 2.36944067  | -0.15375690 |
| S | -4.96959777 | 1.86535539  | -0.30335283 |
| N | -1.22603920 | 1.71345788  | 0.21761369  |
| C | -1.23108455 | 3.10378802  | 0.05617251  |
| C | -2.55230501 | 3.53659413  | -0.16913387 |
| B | -0.01184752 | 0.85067349  | 0.61448157  |
| N | 1.21109593  | 1.70743930  | 0.22573477  |
| C | 1.22211383  | 3.09787056  | 0.06585349  |
| C | -0.00308146 | 3.80631083  | 0.06515660  |
| C | 0.00654414  | 5.28290509  | -0.12860696 |
| F | -1.08212881 | 5.88039312  | 0.39075406  |
| F | 0.04089440  | 5.64340823  | -1.43591828 |
| F | 1.07487859  | 5.87115871  | 0.44298617  |
| F | -0.01105238 | -0.34969585 | -0.09231944 |
| F | -0.01515041 | 0.58900880  | 1.98583088  |
| C | 2.48606593  | 1.25689519  | 0.09827652  |
| C | 3.33053623  | 2.35478046  | -0.13277325 |
| C | 2.54527770  | 3.52603801  | -0.15025007 |
| C | 3.15005783  | 0.00394415  | 0.16632713  |
| C | 4.50676326  | 0.15600418  | -0.01891928 |

|   |             |             |             |
|---|-------------|-------------|-------------|
| S | 4.95538737  | 1.84468575  | -0.27550199 |
| C | 5.53526964  | -0.88761586 | -0.03114708 |
| C | 5.17682882  | -2.21872452 | -0.29354666 |
| C | 6.13683940  | -3.22384095 | -0.29713035 |
| C | 7.46932089  | -2.90395827 | -0.04719138 |
| C | 7.84601566  | -1.58515310 | 0.20880836  |
| C | 6.88389871  | -0.58542154 | 0.22052805  |
| C | 8.53375251  | -3.96069059 | -0.07083989 |
| F | 8.03257980  | -5.20069786 | -0.19034581 |
| F | 9.28514404  | -3.94679473 | 1.04920741  |
| F | 9.39404152  | -3.78786762 | -1.09740888 |
| C | -5.55821318 | -0.86516907 | -0.04658322 |
| C | -6.90481444 | -0.56118291 | 0.19767876  |
| C | -7.87174410 | -1.56154712 | 0.19680509  |
| C | -7.49419640 | -2.87924748 | -0.04128968 |
| C | -6.15774439 | -3.20213661 | -0.28705544 |
| C | -5.19818964 | -2.20183130 | -0.29511565 |
| C | -8.50796824 | -3.98415052 | -0.05262558 |
| F | -9.74061515 | -3.56228452 | 0.27250862  |
| F | -8.18984572 | -4.96987075 | 0.81185909  |
| F | -8.60280104 | -4.57002267 | -1.26528183 |
| H | -2.69398998 | -0.93257711 | 0.34848869  |
| H | -2.87418728 | 4.55250181  | -0.33930447 |
| H | 2.87194003  | 4.54125895  | -0.31654691 |
| H | 2.66721723  | -0.94644423 | 0.35705541  |
| H | 4.14460306  | -2.47099988 | -0.51260215 |
| H | 5.84730377  | -4.24868290 | -0.50282673 |
| H | 8.88548626  | -1.34076336 | 0.40690482  |
| H | 7.18821516  | 0.43257563  | 0.44610634  |
| H | -7.20942353 | 0.45935402  | 0.41097231  |
| H | -8.90954731 | -1.31314003 | 0.39086887  |
| H | -5.87163259 | -4.23194393 | -0.48060791 |
| H | -4.16568717 | -2.45639251 | -0.50992223 |

SBDPiR688 in T<sub>1</sub> State

|   |             |            |             |
|---|-------------|------------|-------------|
| C | -4.61598700 | 0.22807900 | -0.01144000 |
| C | -3.23612800 | 0.02751500 | -0.01074100 |
| C | -2.55707300 | 1.24204300 | -0.02057300 |
| C | -3.39378800 | 2.39486800 | -0.02898400 |
| S | -5.06899900 | 1.93605600 | -0.03158000 |
| N | -1.24417700 | 1.64817100 | -0.01559100 |
| C | -1.23295700 | 3.01971500 | -0.02355500 |
| C | -2.60119800 | 3.51423000 | -0.03223400 |

|   |             |             |             |
|---|-------------|-------------|-------------|
| B | -0.03409800 | 0.69431100  | -0.00775600 |
| N | 1.20397200  | 1.60979800  | -0.00843600 |
| C | 1.20430600  | 2.97345700  | -0.01494600 |
| C | -0.00241300 | 3.71035200  | -0.02173800 |
| C | 0.11221900  | 5.19358700  | -0.02936300 |
| F | -1.07185400 | 5.82388300  | -0.03328900 |
| F | 0.79407700  | 5.65317500  | -1.10672900 |
| F | 0.79243700  | 5.66359900  | 1.04448800  |
| F | -0.04364200 | -0.12703400 | -1.14104400 |
| F | -0.05020700 | -0.11739600 | 1.13175600  |
| C | 2.51697500  | 1.19611600  | -0.00800800 |
| C | 3.35978100  | 2.34739800  | -0.00954500 |
| C | 2.57014600  | 3.46862600  | -0.01487900 |
| C | 3.18905000  | -0.01954300 | -0.00040300 |
| C | 4.57182000  | 0.17505900  | 0.00406600  |
| S | 5.03281900  | 1.87971400  | -0.00664400 |
| C | 5.59894000  | -0.85907600 | 0.01059600  |
| C | 5.27123700  | -2.17949100 | -0.34456000 |
| C | 6.23991400  | -3.17505000 | -0.34096600 |
| C | 7.54902400  | -2.85908600 | 0.01478300  |
| C | 7.89696100  | -1.55366100 | 0.36707600  |
| C | 6.92869000  | -0.56199400 | 0.36577400  |
| C | 8.62243500  | -3.90832800 | 0.02170200  |
| F | 8.16300300  | -5.12386600 | -0.31411200 |
| F | 9.20082700  | -4.02785000 | 1.23426400  |
| F | 9.61786700  | -3.61309000 | -0.83954900 |
| C | -5.64945600 | -0.80057400 | 0.00223200  |
| C | -6.97557900 | -0.49414800 | 0.35026400  |
| C | -7.95374600 | -1.48147900 | 0.36530600  |
| C | -7.61143600 | -2.78931400 | 0.03424400  |
| C | -6.29926000 | -3.11603400 | -0.31700600 |
| C | -5.32658800 | -2.12979600 | -0.33584600 |
| C | -8.64068900 | -3.88141800 | 0.03671600  |
| F | -9.84542100 | -3.45901400 | 0.45186000  |
| F | -8.28441800 | -4.90477400 | 0.83922700  |
| F | -8.81397900 | -4.41264500 | -1.19149600 |
| H | -2.76581800 | -0.94724300 | 0.02017100  |
| H | -2.89953100 | 4.54903300  | -0.03787100 |
| H | 2.86106300  | 4.50827600  | -0.01725200 |
| H | 2.71487100  | -0.99257600 | 0.02416500  |
| H | 4.26010000  | -2.43089400 | -0.64510100 |
| H | 5.97582700  | -4.18893500 | -0.62098100 |
| H | 8.91946700  | -1.31647700 | 0.64599100  |
| H | 7.20950500  | 0.44447900  | 0.66197100  |

|   |             |             |             |
|---|-------------|-------------|-------------|
| H | -7.25232100 | 0.51738500  | 0.63258300  |
| H | -8.97260000 | -1.23222200 | 0.64079900  |
| H | -6.04310600 | -4.13809300 | -0.58073400 |
| H | -4.31607700 | -2.38960200 | -0.63139100 |

SBDPiR688 in T<sub>2</sub> State

|   |             |             |             |
|---|-------------|-------------|-------------|
| C | -4.57806400 | 0.17937900  | -0.01326900 |
| C | -3.21469100 | -0.00096800 | -0.02348800 |
| C | -2.54174400 | 1.25175300  | -0.03835000 |
| C | -3.39014500 | 2.37078700  | -0.03987800 |
| S | -5.00796300 | 1.89630700  | -0.03160400 |
| N | -1.25826900 | 1.67901300  | -0.03934500 |
| C | -1.24009700 | 3.09681700  | -0.04293700 |
| C | -2.58917300 | 3.55386800  | -0.04446600 |
| B | -0.01238500 | 0.71201000  | -0.04169900 |
| N | 1.20631600  | 1.62045500  | -0.02728300 |
| C | 1.21401500  | 3.01057900  | -0.02747500 |
| C | -0.01107700 | 3.74257600  | -0.03994600 |
| C | 0.09859600  | 5.23528300  | -0.04271500 |
| F | -1.09280400 | 5.85566800  | -0.06313000 |
| F | 0.78526700  | 5.69041500  | -1.11105900 |
| F | 0.75209100  | 5.69721100  | 1.04353300  |
| F | -0.07824000 | -0.07942500 | -1.18758400 |
| F | -0.08792000 | -0.09960100 | 1.08858800  |
| C | 2.50755700  | 1.20755600  | -0.01410100 |
| C | 3.34294300  | 2.33173900  | -0.00193500 |
| C | 2.53614800  | 3.48251400  | -0.01167700 |
| C | 3.19412400  | -0.03667300 | -0.00356700 |
| C | 4.55249200  | 0.15375900  | 0.01622200  |
| S | 5.00643100  | 1.86225300  | 0.01945600  |
| C | 5.59598800  | -0.87866200 | 0.02318000  |
| C | 5.32917300  | -2.14915800 | -0.50880900 |
| C | 6.30134400  | -3.14285200 | -0.49910000 |
| C | 7.55919800  | -2.86984900 | 0.03364800  |
| C | 7.84761000  | -1.60949800 | 0.55848200  |
| C | 6.87058600  | -0.62361900 | 0.55583600  |
| C | 8.63944900  | -3.90909400 | 0.03130100  |
| F | 8.20357300  | -5.11307700 | -0.37582200 |
| F | 9.18061300  | -4.08237600 | 1.25527000  |
| F | 9.66445100  | -3.57291800 | -0.78208900 |
| C | -5.63490000 | -0.83703000 | 0.00366600  |
| C | -6.88800200 | -0.57402000 | 0.57198500  |
| C | -7.87790700 | -1.55176800 | 0.58630000  |

|   |             |             |             |
|---|-------------|-------------|-------------|
| C | -7.61340900 | -2.80219200 | 0.03673900  |
| C | -6.36840100 | -3.08244800 | -0.53040900 |
| C | -5.38709100 | -2.10275100 | -0.55330600 |
| C | -8.65055400 | -3.88673200 | 0.05750000  |
| F | -9.84354400 | -3.45538100 | 0.49798900  |
| F | -8.28825000 | -4.91348900 | 0.85477900  |
| F | -8.85132500 | -4.41670900 | -1.16581900 |
| H | -2.72928100 | -0.96934500 | 0.00311400  |
| H | -2.93314600 | 4.57451900  | -0.04497700 |
| H | 2.84635800  | 4.51673600  | -0.00685800 |
| H | 2.72015400  | -1.01081000 | 0.01378600  |
| H | 4.36050000  | -2.35658800 | -0.95165100 |
| H | 6.08216600  | -4.12005200 | -0.91584800 |
| H | 8.82871000  | -1.40126300 | 0.97558600  |
| H | 7.09770800  | 0.34583600  | 0.98967700  |
| H | -7.09689600 | 0.38874400  | 1.03052700  |
| H | -8.84349100 | -1.33917000 | 1.03195500  |
| H | -6.17157000 | -4.05852000 | -0.96423800 |
| H | -4.43013200 | -2.31201700 | -1.02031300 |

SBDPiR698 in S<sub>0</sub> State

|   |             |             |             |
|---|-------------|-------------|-------------|
| C | -4.59286700 | -0.52063300 | 0.01290200  |
| C | -3.23692800 | -0.73190200 | -0.00833300 |
| C | -2.53744100 | 0.50232800  | -0.02842400 |
| C | -3.37885300 | 1.64870300  | -0.01944500 |
| S | -5.05456900 | 1.18730300  | 0.00061000  |
| N | -1.25021700 | 0.88717900  | -0.04093900 |
| C | -1.23319300 | 2.28425300  | -0.04464200 |
| C | -2.58209600 | 2.77066000  | -0.03101900 |
| B | -0.02754500 | -0.06500400 | -0.05589800 |
| N | 1.21566300  | 0.85134400  | -0.04190500 |
| C | 1.20622300  | 2.24169200  | -0.04592800 |
| C | -0.00390700 | 2.94455300  | -0.05158400 |
| C | 0.10290100  | 4.45471800  | -0.05509100 |
| F | -1.07785300 | 5.08045000  | -0.08659500 |
| F | 0.80121800  | 4.88583600  | -1.11988900 |
| F | 0.74967100  | 4.89412400  | 1.03857500  |
| F | -0.04343100 | -0.85726400 | -1.20676600 |
| F | -0.04273200 | -0.89234200 | 1.06904400  |
| C | 2.50493400  | 0.46275900  | -0.02967900 |
| C | 3.34676700  | 1.60708200  | -0.02139800 |
| C | 2.54677000  | 2.73142100  | -0.03297100 |
| C | 3.20258500  | -0.77287000 | -0.00895700 |

|   |             |             |             |
|---|-------------|-------------|-------------|
| C | 4.55875000  | -0.56486000 | 0.01215100  |
| S | 5.02111000  | 1.14242800  | -0.00074400 |
| C | 5.60716400  | -1.59139600 | 0.03199400  |
| C | 5.35752100  | -2.85613700 | -0.52502600 |
| C | 6.33058000  | -3.84796700 | -0.50392000 |
| C | 7.55663500  | -3.55363600 | 0.07383900  |
| C | 7.84856900  | -2.31743100 | 0.62805100  |
| C | 6.86319200  | -1.33650200 | 0.60348400  |
| F | 8.50781300  | -4.51214800 | 0.09418500  |
| C | -5.64295400 | -1.54478100 | 0.03240800  |
| C | -6.90055000 | -1.28466600 | 0.59831500  |
| C | -7.88817200 | -2.26306100 | 0.62219300  |
| C | -7.59702700 | -3.50144700 | 0.07217200  |
| C | -6.36955000 | -3.80063400 | -0.50030000 |
| C | -5.39371600 | -2.81173900 | -0.51991000 |
| F | -8.55046500 | -4.45711400 | 0.09129200  |
| H | -2.77411800 | -1.71043900 | 0.02029400  |
| H | -2.88993400 | 3.80348700  | -0.02735900 |
| H | 2.84373300  | 3.77032400  | -0.02994500 |
| H | 2.73803900  | -1.75065800 | 0.01998800  |
| H | 4.40164300  | -3.06070600 | -0.99660700 |
| H | 6.15511800  | -4.82783000 | -0.93468200 |
| H | 8.82124300  | -2.13741900 | 1.07280500  |
| H | 7.07308300  | -0.37191500 | 1.05708700  |
| H | -7.11007000 | -0.31819200 | 1.04805200  |
| H | -8.86207500 | -2.07959700 | 1.06277400  |
| H | -6.19519800 | -4.78209400 | -0.92779400 |
| H | -4.43651000 | -3.02019500 | -0.98699200 |

SBDPiR698 in S<sub>1</sub> State

|   |             |             |             |
|---|-------------|-------------|-------------|
| C | -4.60673500 | -0.52287300 | -0.00007000 |
| C | -3.22803100 | -0.71905300 | -0.00784700 |
| C | -2.54513100 | 0.49978900  | -0.01806000 |
| C | -3.38558400 | 1.64999000  | -0.01803400 |
| S | -5.06089800 | 1.18761000  | -0.01133200 |
| N | -1.24334900 | 0.90279600  | -0.01865100 |
| C | -1.23514500 | 2.28799000  | -0.02276100 |
| C | -2.59481900 | 2.77531600  | -0.02220000 |
| B | -0.02929000 | -0.04628300 | -0.01944600 |
| N | 1.20988500  | 0.86561600  | -0.01959800 |
| C | 1.21100000  | 2.24396500  | -0.02387900 |
| C | -0.00108100 | 2.97121300  | -0.02610200 |
| C | 0.10975900  | 4.46165400  | -0.02988100 |



|   |             |             |             |
|---|-------------|-------------|-------------|
| F | -1.07402200 | 5.08941900  | -0.03589200 |
| F | 0.79185800  | 4.91542500  | -1.10554400 |
| F | 0.78400200  | 4.92133200  | 1.04835400  |
| F | -0.04359000 | -0.86559200 | -1.15630800 |
| F | -0.04244400 | -0.86640800 | 1.11634700  |
| C | 2.51168800  | 0.45731700  | -0.01926000 |
| C | 3.35621700  | 1.60611900  | -0.01956500 |
| C | 2.56595300  | 2.73306100  | -0.02386100 |
| C | 3.19027700  | -0.76290600 | -0.00909000 |
| C | 4.57033300  | -0.57115400 | -0.00144300 |
| S | 5.02977600  | 1.13721200  | -0.01336400 |
| C | 5.59593000  | -1.59634000 | 0.01420400  |
| C | 5.27025200  | -2.93393700 | -0.29955800 |
| C | 6.23743100  | -3.92698200 | -0.28254300 |
| C | 7.53986200  | -3.57473700 | 0.04682300  |
| C | 7.91101000  | -2.27391800 | 0.35755600  |
| C | 6.93388000  | -1.28968600 | 0.33968700  |
| F | 8.48335300  | -4.53624100 | 0.06314100  |
| C | -5.63677400 | -1.54406300 | 0.01503500  |
| C | -6.97384300 | -1.23150200 | 0.33795800  |
| C | -7.95546400 | -2.21139500 | 0.35451200  |
| C | -7.58950800 | -3.51390300 | 0.04505000  |
| C | -6.28805300 | -3.87190000 | -0.28179500 |
| C | -5.31643500 | -2.88307100 | -0.29754300 |
| F | -8.53733600 | -4.47135000 | 0.05986700  |
| H | -2.75418900 | -1.69236300 | 0.01966500  |
| H | -2.90076000 | 3.80829500  | -0.02269300 |
| H | 2.86325900  | 3.77131000  | -0.02483100 |
| H | 2.71346600  | -1.73473100 | 0.01910000  |
| H | 4.25621200  | -3.19719900 | -0.58012500 |
| H | 6.00052300  | -4.95670700 | -0.52741400 |
| H | 8.94106900  | -2.05006600 | 0.61270100  |
| H | 7.21726300  | -0.27482800 | 0.60368800  |
| H | -7.25335800 | -0.21523600 | 0.60063700  |
| H | -8.98500400 | -1.98277400 | 0.60753100  |
| H | -6.05517800 | -4.90275800 | -0.52579400 |
| H | -4.30299300 | -3.15080800 | -0.57605400 |

SBDPiR698 in S<sub>2</sub> State

|   |             |             |             |
|---|-------------|-------------|-------------|
| C | -4.51250100 | -0.59037600 | 0.05908200  |
| C | -3.15991200 | -0.74788200 | -0.14284700 |
| C | -2.49418600 | 0.50817100  | -0.12149700 |
| C | -3.33451300 | 1.61141200  | 0.09650000  |

|   |             |             |             |
|---|-------------|-------------|-------------|
| S | -4.95981200 | 1.10567700  | 0.26222800  |
| N | -1.21897700 | 0.95403200  | -0.26412600 |
| C | -1.22688500 | 2.34872300  | -0.13161000 |
| C | -2.54743200 | 2.78197800  | 0.08595600  |
| B | 0.00009400  | 0.08980900  | -0.64539800 |
| N | 1.21850800  | 0.95342500  | -0.26377400 |
| C | 1.22676100  | 2.34804900  | -0.13169900 |
| C | 0.00020400  | 3.05365100  | -0.15381800 |
| C | 0.00065100  | 4.53228000  | 0.01409100  |
| F | -1.07910300 | 5.11713900  | -0.53932500 |
| F | 1.07890300  | 5.11689900  | -0.54236100 |
| F | 0.00257800  | 4.91704800  | 1.31596400  |
| F | -0.00073100 | -0.18941900 | -2.01467000 |
| F | -0.00087600 | -1.10247800 | 0.07498000  |
| C | 2.49407400  | 0.50780900  | -0.12168500 |
| C | 3.33442500  | 1.61123100  | 0.09586600  |
| C | 2.54759100  | 2.78143900  | 0.08541000  |
| C | 3.15991800  | -0.74807000 | -0.14261000 |
| C | 4.51241200  | -0.59042400 | 0.05918700  |
| S | 4.96035800  | 1.10560900  | 0.26212100  |
| C | 5.54297200  | -1.63213100 | 0.10921000  |
| C | 5.35426300  | -2.83266200 | -0.59492600 |
| C | 6.30699500  | -3.84364600 | -0.54841400 |
| C | 7.45557400  | -3.63179800 | 0.19916900  |
| C | 7.68740400  | -2.45974500 | 0.90077300  |
| C | 6.72003400  | -1.46121400 | 0.85381800  |
| F | 8.38865500  | -4.60855200 | 0.24319900  |
| C | -5.54322500 | -1.63186800 | 0.10917700  |
| C | -6.72000000 | -1.46095400 | 0.85422100  |
| C | -7.68749300 | -2.45935300 | 0.90111200  |
| C | -7.45599300 | -3.63123300 | 0.19909900  |
| C | -6.30762100 | -3.84306300 | -0.54881700 |
| C | -5.35476500 | -2.83221300 | -0.59532400 |
| F | -8.38915500 | -4.60784200 | 0.24311400  |
| H | -2.67767700 | -1.70993900 | -0.26616400 |
| H | -2.87159200 | 3.80019600  | 0.23750700  |
| H | 2.87156900  | 3.79975600  | 0.23664600  |
| H | 2.67790600  | -1.71027400 | -0.26561500 |
| H | 4.46247200  | -2.97114600 | -1.19800600 |
| H | 6.17543300  | -4.77469900 | -1.08911500 |
| H | 8.59933800  | -2.34209900 | 1.47596900  |
| H | 6.88195600  | -0.55051700 | 1.42386100  |
| H | -6.88164600 | -0.55047000 | 1.42469000  |
| H | -8.59923600 | -2.34178200 | 1.47662100  |

|   |             |             |             |
|---|-------------|-------------|-------------|
| H | -6.17630400 | -4.77401200 | -1.08974900 |
| H | -4.46310100 | -2.97066700 | -1.19859900 |

SBDPiR698 in T<sub>1</sub> State

|   |             |             |             |
|---|-------------|-------------|-------------|
| C | -4.61226400 | -0.51755400 | 0.00271100  |
| C | -3.23176500 | -0.71448800 | -0.00524900 |
| C | -2.55373000 | 0.50102600  | -0.01860100 |
| C | -3.39054800 | 1.65301600  | -0.02041400 |
| S | -5.06532900 | 1.19220600  | -0.01327600 |
| N | -1.24146000 | 0.90872700  | -0.02015600 |
| C | -1.23144800 | 2.28146900  | -0.02604600 |
| C | -2.59812800 | 2.77382000  | -0.02572900 |
| B | -0.03101900 | -0.04319400 | -0.02064400 |
| N | 1.20702100  | 0.87063000  | -0.02033000 |
| C | 1.20781500  | 2.23571800  | -0.02577700 |
| C | 0.00000500  | 2.97210300  | -0.03018000 |
| C | 0.11386100  | 4.45413400  | -0.03458800 |
| F | -1.07051200 | 5.08489400  | -0.04443000 |
| F | 0.80183300  | 4.91797700  | -1.10724500 |
| F | 0.78792600  | 4.92566700  | 1.04374100  |
| F | -0.04406600 | -0.86141300 | -1.15764700 |
| F | -0.04372900 | -0.86253500 | 1.11495700  |
| C | 2.51940900  | 0.45622800  | -0.01854100 |
| C | 3.36167600  | 1.60719200  | -0.01968300 |
| C | 2.57153400  | 2.72940000  | -0.02490000 |
| C | 3.19141300  | -0.76005900 | -0.00548300 |
| C | 4.57471000  | -0.56831500 | 0.00299600  |
| S | 5.03450100  | 1.13878000  | -0.01209600 |
| C | 5.60177100  | -1.59910800 | 0.01880000  |
| C | 5.27739500  | -2.92625900 | -0.32587400 |
| C | 6.24269000  | -3.92281100 | -0.31134800 |
| C | 7.53891100  | -3.57986900 | 0.04740000  |
| C | 7.90679000  | -2.28721300 | 0.38999600  |
| C | 6.93075800  | -1.30008200 | 0.37387100  |
| F | 8.48095500  | -4.54433300 | 0.06136500  |
| C | -5.64508500 | -1.54399200 | 0.01847700  |
| C | -6.97215000 | -1.23904100 | 0.37423200  |
| C | -7.95330000 | -2.22150500 | 0.39026300  |
| C | -7.59199200 | -3.51570400 | 0.04736100  |
| C | -6.29759000 | -3.86444700 | -0.31193700 |
| C | -5.32748800 | -2.87228300 | -0.32679200 |
| F | -8.53891700 | -4.47601200 | 0.06128900  |
| H | -2.76037200 | -1.68883200 | 0.02257200  |

|   |             |             |             |
|---|-------------|-------------|-------------|
| H | -2.89796100 | 3.80814100  | -0.02729200 |
| H | 2.86327600  | 3.76876400  | -0.02607400 |
| H | 2.71631300  | -1.73258400 | 0.02214900  |
| H | 4.26696700  | -3.18093700 | -0.62698400 |
| H | 6.00766300  | -4.94699700 | -0.57973300 |
| H | 8.93243600  | -2.07013700 | 0.66742600  |
| H | 7.21036500  | -0.29059900 | 0.66146800  |
| H | -7.24678800 | -0.22825600 | 0.66200800  |
| H | -8.97777700 | -1.99921900 | 0.66795800  |
| H | -6.06736200 | -4.88965600 | -0.58065300 |
| H | -4.31826600 | -3.13144900 | -0.62828800 |

SBDPiR698 in T<sub>2</sub> State

|   |             |             |             |
|---|-------------|-------------|-------------|
| C | 4.57129400  | -0.56381600 | -0.01414300 |
| C | 3.20823900  | -0.73963500 | -0.00360000 |
| C | 2.53795800  | 0.51549900  | 0.02522400  |
| C | 3.38742000  | 1.63224000  | 0.03293500  |
| S | 5.00473700  | 1.15292300  | 0.01948100  |
| N | 1.25477600  | 0.94480000  | 0.03039500  |
| C | 1.23756300  | 2.36214500  | 0.04309000  |
| C | 2.58703400  | 2.81733100  | 0.04456300  |
| B | 0.00965600  | -0.02140200 | 0.02428300  |
| N | -1.20935000 | 0.88581600  | 0.02923400  |
| C | -1.21721500 | 2.27652900  | 0.03997400  |
| C | 0.00793100  | 3.00821500  | 0.04972800  |
| C | -0.10110600 | 4.50000800  | 0.06035800  |
| F | 1.09070400  | 5.12045600  | 0.07635700  |
| F | -0.78132900 | 4.95212600  | 1.13480700  |
| F | -0.76118100 | 4.96885800  | -1.01966600 |
| F | 0.08029600  | -0.83122300 | 1.15782600  |
| F | 0.08064000  | -0.81745900 | -1.11826000 |
| C | -2.51032700 | 0.47165600  | 0.02186900  |
| C | -3.34629800 | 1.59460400  | 0.02520800  |
| C | -2.54003400 | 2.74653600  | 0.03728100  |
| C | -3.19583200 | -0.77467700 | -0.00184000 |
| C | -4.55377200 | -0.58690800 | -0.01336900 |
| S | -5.00989100 | 1.12108800  | 0.00961200  |
| C | -5.59832200 | -1.62029700 | -0.02933100 |
| C | -5.34973700 | -2.87721600 | 0.54491800  |
| C | -6.31569700 | -3.87746500 | 0.52412000  |
| C | -7.53918800 | -3.59827000 | -0.06499500 |
| C | -7.83268800 | -2.36965400 | -0.63328200 |
| C | -6.85117400 | -1.38308100 | -0.61444500 |

|   |             |             |             |
|---|-------------|-------------|-------------|
| F | -8.48653700 | -4.56477100 | -0.08196900 |
| C | 5.62696900  | -1.58229500 | -0.03123900 |
| C | 6.86831400  | -1.33698800 | -0.63606900 |
| C | 7.85797400  | -2.31440000 | -0.65307500 |
| C | 7.58139700  | -3.53838700 | -0.06550200 |
| C | 6.36682600  | -3.82327400 | 0.54012900  |
| C | 5.39165400  | -2.83308000 | 0.56063600  |
| F | 8.53572700  | -4.49377300 | -0.08147200 |
| H | 2.72159700  | -1.70699800 | -0.03904100 |
| H | 2.93216000  | 3.83755400  | 0.05086300  |
| H | -2.85122800 | 3.78051300  | 0.04302000  |
| H | -2.72233400 | -1.74871700 | -0.03584900 |
| H | -4.39691500 | -3.06938700 | 1.02816400  |
| H | -6.13640600 | -4.85144700 | 0.96688100  |
| H | -8.80313900 | -2.19855100 | -1.08669700 |
| H | -7.06233100 | -0.42505000 | -1.08121900 |
| H | 7.06742100  | -0.38550600 | -1.12213800 |
| H | 8.82102500  | -2.14131500 | -1.12090800 |
| H | 6.20157000  | -4.79404600 | 0.99486900  |
| H | 4.44481100  | -3.02838000 | 1.05428500  |

SBDPiR710 in S<sub>0</sub> State

|   |             |             |             |
|---|-------------|-------------|-------------|
| C | -4.59342500 | -0.50279000 | 0.01569800  |
| C | -3.23604600 | -0.71084200 | -0.00581000 |
| C | -2.53801100 | 0.52312400  | -0.02266400 |
| C | -3.37977200 | 1.66941900  | -0.01078800 |
| S | -5.05526600 | 1.20651600  | 0.00992900  |
| N | -1.25067500 | 0.90871300  | -0.03611200 |
| C | -1.23368800 | 2.30578600  | -0.03845600 |
| C | -2.58316500 | 2.79140500  | -0.02238900 |
| B | -0.02858200 | -0.04328000 | -0.05351500 |
| N | 1.21466100  | 0.87216100  | -0.03972200 |
| C | 1.20587500  | 2.26256200  | -0.04362200 |
| C | -0.00417000 | 2.96582400  | -0.04756700 |
| C | 0.10269400  | 4.47540200  | -0.05152500 |
| F | -1.07818400 | 5.10138500  | -0.08490000 |
| F | 0.80227700  | 4.90716500  | -1.11561200 |
| F | 0.74809400  | 4.91659300  | 1.04262500  |
| F | -0.04606400 | -0.83506100 | -1.20520400 |
| F | -0.04281300 | -0.87271500 | 1.07045100  |
| C | 2.50390200  | 0.48227800  | -0.02853000 |
| C | 3.34656900  | 1.62615800  | -0.02065400 |
| C | 2.54716800  | 2.75089000  | -0.03179300 |

|   |             |             |             |
|---|-------------|-------------|-------------|
| C | 3.19974900  | -0.75339200 | -0.00968300 |
| C | 4.55735800  | -0.54899600 | 0.00889900  |
| S | 5.02051700  | 1.15936700  | -0.00148700 |
| C | 5.60355700  | -1.57607400 | 0.02557700  |
| C | 5.34110000  | -2.85657500 | -0.48247900 |
| C | 6.32285200  | -3.84166600 | -0.45766100 |
| C | 7.59467800  | -3.58479000 | 0.06515400  |
| C | 7.85509500  | -2.30185900 | 0.56391300  |
| C | 6.88052900  | -1.31251400 | 0.54663800  |
| C | 8.65895200  | -4.64878300 | 0.09964800  |
| C | -5.64140200 | -1.52712600 | 0.03124300  |
| C | -6.91843700 | -1.25985000 | 0.54250000  |
| C | -7.89689800 | -2.24962300 | 0.55850700  |
| C | -7.63608300 | -3.53136100 | 0.06596100  |
| C | -6.35806000 | -3.79344100 | -0.44823600 |
| C | -5.37640800 | -2.81303100 | -0.47045100 |
| C | -8.69075100 | -4.60503300 | 0.07249100  |
| H | -2.77113400 | -1.68830900 | 0.01728100  |
| H | -2.89120600 | 3.82418100  | -0.01744700 |
| H | 2.84489600  | 3.78958100  | -0.02927700 |
| H | 2.73317200  | -1.73008000 | 0.01732500  |
| H | 4.37157000  | -3.07697900 | -0.91887500 |
| H | 6.09998300  | -4.82568600 | -0.86160700 |
| H | 8.83533500  | -2.07831700 | 0.97779200  |
| H | 7.10994800  | -0.33470000 | 0.96217700  |
| H | 8.32184000  | -5.56194300 | -0.39634600 |
| H | 8.92278600  | -4.89966700 | 1.13252300  |
| H | 9.57199600  | -4.30496700 | -0.39655300 |
| H | -7.14973600 | -0.28081800 | 0.95400100  |
| H | -8.87796900 | -2.02240500 | 0.96686100  |
| H | -6.13531900 | -4.78067600 | -0.84570000 |
| H | -4.40368200 | -3.03665700 | -0.89784500 |
| H | -8.94502900 | -4.90471000 | -0.94969300 |
| H | -9.60380800 | -4.26031700 | 0.56331200  |
| H | -8.33500300 | -5.49828800 | 0.59566300  |

SBDPiR710 in S<sub>1</sub> State

|   |             |             |             |
|---|-------------|-------------|-------------|
| C | -4.60757900 | -0.50434100 | 0.00565300  |
| C | -3.22682800 | -0.69600500 | 0.00872900  |
| C | -2.54577600 | 0.52234700  | 0.00277800  |
| C | -3.38643600 | 1.67202300  | -0.00410100 |
| S | -5.06141700 | 1.20882500  | -0.00628600 |
| N | -1.24389300 | 0.92618800  | 0.00371100  |

|   |             |             |             |
|---|-------------|-------------|-------------|
| C | -1.23583800 | 2.31139300  | -0.00415700 |
| C | -2.59528000 | 2.79763600  | -0.00894100 |
| B | -0.03060900 | -0.02244200 | 0.01011400  |
| N | 1.20848900  | 0.88803000  | 0.00181200  |
| C | 1.21062400  | 2.26651300  | -0.00607200 |
| C | -0.00127500 | 2.99383200  | -0.00774200 |
| C | 0.10965500  | 4.48368400  | -0.01559300 |
| F | -1.07414300 | 5.11217500  | -0.01446300 |
| F | 0.78411400  | 4.93667000  | -1.09702600 |
| F | 0.79155000  | 4.94703600  | 1.05671800  |
| F | -0.04565200 | -0.85225700 | -1.11990000 |
| F | -0.04381000 | -0.83500400 | 1.15241900  |
| C | 2.51010500  | 0.47807800  | -0.00081600 |
| C | 3.35552300  | 1.62590200  | -0.00903500 |
| C | 2.56557700  | 2.75362800  | -0.01291900 |
| C | 3.18624900  | -0.74197800 | 0.00471800  |
| C | 4.56845200  | -0.55551400 | 0.00015900  |
| S | 5.02838600  | 1.15531400  | -0.01284400 |
| C | 5.58889600  | -1.58162600 | 0.00338200  |
| C | 5.23721500  | -2.94428800 | -0.09864300 |
| C | 6.21220800  | -3.93075700 | -0.09446900 |
| C | 7.57223900  | -3.60986600 | 0.00908600  |
| C | 7.92425700  | -2.25467300 | 0.10822000  |
| C | 6.96020600  | -1.26091000 | 0.10661700  |
| C | 8.63224600  | -4.67497500 | 0.01861000  |
| C | -5.63279300 | -1.52616100 | 0.00754900  |
| C | -7.00007100 | -1.20171900 | 0.11241100  |
| C | -7.97051800 | -2.19392100 | 0.11122000  |
| C | -7.62417000 | -3.54650300 | 0.00673400  |
| C | -6.26190700 | -3.87256900 | -0.09710600 |
| C | -5.28511700 | -2.89229100 | -0.09835000 |
| C | -8.66853100 | -4.62695500 | 0.00164300  |
| H | -2.75048800 | -1.66792400 | 0.02192900  |
| H | -2.90169100 | 3.83044100  | -0.01513700 |
| H | 2.86402300  | 3.79151900  | -0.01951600 |
| H | 2.70661600  | -1.71225400 | 0.01920300  |
| H | 4.19523100  | -3.23278700 | -0.18921700 |
| H | 5.91485900  | -4.97273600 | -0.17650000 |
| H | 8.97319000  | -1.98113600 | 0.19060200  |
| H | 7.27659400  | -0.22487300 | 0.19376000  |
| H | 8.19798900  | -5.66908200 | -0.10849100 |
| H | 9.18661800  | -4.66068200 | 0.96329400  |
| H | 9.35713500  | -4.50934100 | -0.78529100 |
| H | -7.31354900 | -0.16515700 | 0.20381700  |

|   |             |             |             |
|---|-------------|-------------|-------------|
| H | -9.01745300 | -1.91548500 | 0.19550100  |
| H | -5.96961200 | -4.91636000 | -0.18170400 |
| H | -4.24384600 | -3.18331800 | -0.18892000 |
| H | -8.63346300 | -5.19501800 | -0.93425200 |
| H | -9.67210400 | -4.21033900 | 0.11257700  |
| H | -8.49720900 | -5.33651200 | 0.81806800  |

SBDPiR710 in S<sub>2</sub> State

|   |             |             |             |
|---|-------------|-------------|-------------|
| C | 4.51392000  | -0.57306500 | -0.05822400 |
| C | 3.16079200  | -0.72880400 | 0.14330000  |
| C | 2.49474600  | 0.52710900  | 0.11855300  |
| C | 3.33498700  | 1.63020100  | -0.10175500 |
| S | 4.96056600  | 1.12374500  | -0.26671100 |
| N | 1.21968300  | 0.97277300  | 0.26127700  |
| C | 1.22731300  | 2.36782800  | 0.12721100  |
| C | 2.54785000  | 2.80051400  | -0.09195300 |
| B | 0.00131700  | 0.10917400  | 0.64393000  |
| N | -1.21780900 | 0.97189800  | 0.26266500  |
| C | -1.22654400 | 2.36696700  | 0.12946500  |
| C | 0.00012400  | 3.07255100  | 0.15015900  |
| C | -0.00112300 | 4.55052300  | -0.01979200 |
| F | 1.07952700  | 5.13716100  | 0.53054400  |
| F | -1.07847900 | 5.13608800  | 0.53815000  |
| F | -0.00600200 | 4.93467300  | -1.32217100 |
| F | 0.00235300  | -0.16936100 | 2.01381800  |
| F | 0.00145100  | -1.08425600 | -0.07497900 |
| C | -2.49294200 | 0.52564800  | 0.12187300  |
| C | -3.33420600 | 1.62850200  | -0.09600200 |
| C | -2.54773000 | 2.79912700  | -0.08701300 |
| C | -3.15795700 | -0.73079300 | 0.14518400  |
| C | -4.51145100 | -0.57576500 | -0.05438700 |
| S | -4.95968700 | 1.12102400  | -0.26017300 |
| C | -5.54207200 | -1.61626100 | -0.10165900 |
| C | -5.34540000 | -2.83032000 | 0.57196800  |
| C | -6.30904000 | -3.83272400 | 0.51886100  |
| C | -7.50074000 | -3.65761300 | -0.19201600 |
| C | -7.69716700 | -2.43935000 | -0.85462200 |
| C | -6.73726200 | -1.43572800 | -0.81586700 |
| C | -8.54557800 | -4.74006300 | -0.25370400 |
| C | 5.54515600  | -1.61287800 | -0.10601600 |
| C | 6.73753400  | -1.43451500 | -0.81953200 |
| C | 7.69933000  | -2.44094400 | -0.85747400 |
| C | 7.50304200  | -3.65496400 | -0.19410200 |



|   |             |             |             |
|---|-------------|-------------|-------------|
| C | 6.30882100  | -3.82860400 | 0.51948900  |
| C | 5.34764000  | -2.82834700 | 0.57118800  |
| C | 8.53368300  | -4.75160400 | -0.23873300 |
| H | 2.67792400  | -1.69012500 | 0.26902600  |
| H | 2.87165200  | 3.81856600  | -0.24513900 |
| H | -2.87224800 | 3.81715700  | -0.23891800 |
| H | -2.67430700 | -1.69202300 | 0.26848600  |
| H | -4.44239800 | -2.98437200 | 1.15540400  |
| H | -6.13638300 | -4.76492600 | 1.05042600  |
| H | -8.61384200 | -2.27858300 | -1.41694000 |
| H | -6.91342800 | -0.51350300 | -1.36400300 |
| H | -8.26885700 | -5.59213800 | 0.37169800  |
| H | -8.67346100 | -5.09902500 | -1.28042000 |
| H | -9.51706100 | -4.36672300 | 0.08548300  |
| H | 6.91470900  | -0.51379000 | -1.36983500 |
| H | 8.61496400  | -2.28075500 | -1.42059800 |
| H | 6.13701300  | -4.76047700 | 1.05299200  |
| H | 4.44431600  | -2.98015200 | 1.15471300  |
| H | 8.83632400  | -5.04487200 | 0.77160900  |
| H | 9.42536000  | -4.43420200 | -0.78454000 |
| H | 8.13195900  | -5.64341900 | -0.73122100 |

SBDPiR710 in T<sub>1</sub> State

|   |             |             |             |
|---|-------------|-------------|-------------|
| C | 4.61521500  | -0.50150100 | -0.01128900 |
| C | 3.23368500  | -0.69777200 | 0.00024100  |
| C | 2.55502200  | 0.51706400  | 0.01171100  |
| C | 3.39119300  | 1.66962300  | 0.00862600  |
| S | 5.06609900  | 1.21023200  | -0.00230900 |
| N | 1.24256200  | 0.92466500  | 0.01758500  |
| C | 1.23231500  | 2.29790600  | 0.02281900  |
| C | 2.59793000  | 2.79024800  | 0.01662000  |
| B | 0.03216100  | -0.02680500 | 0.02397600  |
| N | -1.20640600 | 0.88582400  | 0.01854500  |
| C | -1.20776200 | 2.25130900  | 0.02433400  |
| C | 0.00031800  | 2.98779700  | 0.03063200  |
| C | -0.11386200 | 4.46918400  | 0.03956200  |
| F | 1.07022500  | 5.10076600  | 0.06153900  |
| F | -0.81046000 | 4.92953000  | 1.10864900  |
| F | -0.77956500 | 4.94653900  | -1.04201300 |
| F | 0.04577700  | -0.83949500 | 1.16555000  |
| F | 0.04480800  | -0.85339300 | -1.10699000 |
| C | -2.51884300 | 0.47074900  | 0.01378900  |
| C | -3.36097700 | 1.62195800  | 0.01223100  |

|   |             |             |             |
|---|-------------|-------------|-------------|
| C | -2.57050400 | 2.74436700  | 0.02001400  |
| C | -3.19076900 | -0.74500300 | 0.00248500  |
| C | -4.57548300 | -0.55472700 | -0.00722900 |
| S | -5.03364100 | 1.15430300  | 0.00253700  |
| C | -5.60306100 | -1.58206000 | -0.01882100 |
| C | -5.28194800 | -2.91585700 | 0.29447200  |
| C | -6.26087200 | -3.90097400 | 0.28243200  |
| C | -7.59019500 | -3.60081100 | -0.03762000 |
| C | -7.91022000 | -2.27057000 | -0.34533800 |
| C | -6.94152500 | -1.27905200 | -0.33781000 |
| C | -8.65236600 | -4.66539800 | -0.05883300 |
| C | 5.64908800  | -1.52426500 | -0.02236900 |
| C | 6.98139000  | -1.21859400 | -0.34967500 |
| C | 7.95716000  | -2.20831400 | -0.35680300 |
| C | 7.64528000  | -3.53434200 | -0.03953200 |
| C | 6.31530400  | -3.83870800 | 0.28832000  |
| C | 5.33427600  | -2.85997400 | 0.30022200  |
| C | 8.69649800  | -4.61015300 | -0.03829900 |
| H | 2.76256600  | -1.67236500 | -0.02209600 |
| H | 2.89762300  | 3.82459400  | 0.01601900  |
| H | -2.86254100 | 3.78363600  | 0.02052200  |
| H | -2.71533100 | -1.71745000 | -0.02134500 |
| H | -4.26651400 | -3.18209700 | 0.56941800  |
| H | -5.99014800 | -4.92289000 | 0.53384400  |
| H | -8.93541200 | -2.01351600 | -0.59962900 |
| H | -7.22692400 | -0.26371200 | -0.60038000 |
| H | -8.25657700 | -5.62712500 | 0.27514500  |
| H | -9.05150000 | -4.79282800 | -1.07077600 |
| H | -9.49067200 | -4.39289300 | 0.59018900  |
| H | 7.26161900  | -0.20412800 | -0.62105800 |
| H | 8.97882600  | -1.94727500 | -0.61903000 |
| H | 6.05089100  | -4.86144700 | 0.54553100  |
| H | 4.32052400  | -3.12772400 | 0.58009500  |
| H | 8.82018700  | -5.02913200 | 0.96601700  |
| H | 9.66270200  | -4.22070800 | -0.36694400 |
| H | 8.41266500  | -5.43321800 | -0.70192800 |

SBDPiR710 in T<sub>2</sub> State

|   |             |             |             |
|---|-------------|-------------|-------------|
| C | -4.57206700 | -0.54834300 | 0.01880800  |
| C | -3.20827600 | -0.72279400 | 0.00791600  |
| C | -2.53822600 | 0.53262800  | -0.01829800 |
| C | -3.38780500 | 1.64939100  | -0.02376900 |
| S | -5.00521800 | 1.16889000  | -0.01067900 |

|   |             |             |             |
|---|-------------|-------------|-------------|
| N | -1.25505700 | 0.96212500  | -0.02529100 |
| C | -1.23803100 | 2.37926800  | -0.03772000 |
| C | -2.58782100 | 2.83404700  | -0.03631900 |
| B | -0.01004700 | -0.00368400 | -0.02279700 |
| N | 1.20914400  | 0.90314000  | -0.02759800 |
| C | 1.21691300  | 2.29394700  | -0.03931600 |
| C | -0.00823000 | 3.02545000  | -0.04745400 |
| C | 0.10075800  | 4.51677000  | -0.05934600 |
| F | -1.09107500 | 5.13757600  | -0.07548000 |
| F | 0.78064300  | 4.96881200  | -1.13439100 |
| F | 0.76131800  | 4.98750900  | 1.01994900  |
| F | -0.08229100 | -0.81173600 | -1.15784100 |
| F | -0.07900900 | -0.80256900 | 1.11824200  |
| C | 2.51027000  | 0.48867700  | -0.02143500 |
| C | 3.34633800  | 1.61153600  | -0.02655400 |
| C | 2.54002800  | 2.76353500  | -0.03843700 |
| C | 3.19544100  | -0.75775300 | 0.00188200  |
| C | 4.55410300  | -0.57182400 | 0.01060300  |
| S | 5.00980700  | 1.13720500  | -0.01263600 |
| C | 5.59910600  | -1.60399900 | 0.02464200  |
| C | 5.34486600  | -2.87410000 | -0.51138000 |
| C | 6.32236700  | -3.86501900 | -0.48532900 |
| C | 7.58698700  | -3.62311100 | 0.06014500  |
| C | 7.84138600  | -2.34977000 | 0.58435900  |
| C | 6.86811100  | -1.35751400 | 0.57178700  |
| C | 8.64932000  | -4.69061900 | 0.08919500  |
| C | -5.62897300 | -1.56416200 | 0.03315500  |
| C | -6.88065300 | -1.31340000 | 0.60845900  |
| C | -7.86571700 | -2.29789900 | 0.61530400  |
| C | -7.63240100 | -3.55809200 | 0.05876000  |
| C | -6.37610200 | -3.80373800 | -0.51282200 |
| C | -5.39051100 | -2.82634400 | -0.53449000 |
| C | -8.69208400 | -4.62749000 | 0.06178200  |
| H | -2.72123500 | -1.69001800 | 0.04013700  |
| H | -2.93284000 | 3.85431900  | -0.04167200 |
| H | 2.85121800  | 3.79753500  | -0.04514300 |
| H | 2.72110200  | -1.73128300 | 0.03615900  |
| H | 4.38177000  | -3.08214100 | -0.96832900 |
| H | 6.10158100  | -4.84133300 | -0.90944800 |
| H | 8.81574400  | -2.13527100 | 1.01729200  |
| H | 7.09225600  | -0.38831300 | 1.01009200  |
| H | 8.30455300  | -5.60442600 | -0.40083900 |
| H | 8.92359200  | -4.94037400 | 1.11958500  |
| H | 9.55874800  | -4.35312800 | -0.41831200 |

|   |             |             |             |
|---|-------------|-------------|-------------|
| H | -7.08948300 | -0.35494900 | 1.07802000  |
| H | -8.82872400 | -2.08361600 | 1.07098200  |
| H | -6.17374000 | -4.77436500 | -0.95923600 |
| H | -4.43507800 | -3.03315500 | -1.00780100 |
| H | -8.95903900 | -4.91312400 | -0.96099100 |
| H | -9.59800700 | -4.28546500 | 0.56757000  |
| H | -8.33507400 | -5.52887400 | 0.57011000  |

SBDPiR731 in S<sub>0</sub> State

|   |             |             |             |
|---|-------------|-------------|-------------|
| C | 1.23329300  | 2.52855400  | -0.03605400 |
| N | 1.24888300  | 1.13140000  | -0.03365500 |
| B | 0.02679200  | 0.18070900  | -0.00731600 |
| N | -1.21511200 | 1.09652300  | 0.02681500  |
| C | -1.20536400 | 2.48697600  | 0.03286800  |
| C | 0.00476700  | 3.18962100  | -0.00096500 |
| C | -2.50436300 | 0.70664800  | 0.05746300  |
| C | -3.34584200 | 1.85081100  | 0.08382000  |
| C | -2.54638800 | 2.97528400  | 0.06938000  |
| C | 2.58367500  | 3.01182300  | -0.06759900 |
| C | 3.37832900  | 1.88881900  | -0.08237500 |
| C | 2.53561300  | 0.74352400  | -0.06137600 |
| C | -3.19941000 | -0.52832100 | 0.05331300  |
| C | -4.55866400 | -0.32742100 | 0.07929600  |
| S | -5.01942900 | 1.38325600  | 0.11961700  |
| S | 5.05265700  | 1.42229700  | -0.11420400 |
| C | 4.59012600  | -0.28873400 | -0.07899300 |
| C | 3.23037500  | -0.49078100 | -0.05794600 |
| F | 0.06976600  | -0.63527600 | 1.12676600  |
| F | 0.01459600  | -0.62674300 | -1.14826200 |
| C | -0.10112800 | 4.69849700  | 0.00255700  |
| F | 1.08026500  | 5.32433000  | -0.02677300 |
| F | -0.74646100 | 5.13572700  | 1.09859200  |
| F | -0.80050600 | 5.13733900  | -1.05942500 |
| C | 5.63387100  | -1.31307600 | -0.07849500 |
| C | -5.60254800 | -1.35299100 | 0.08020900  |
| C | 6.95244300  | -1.01910800 | 0.28933100  |
| C | 7.94181900  | -1.99858000 | 0.30326000  |
| C | 7.61531100  | -3.30976000 | -0.05664600 |
| C | 6.29942400  | -3.62150000 | -0.43356800 |
| C | 5.32818300  | -2.63894700 | -0.44579500 |
| C | -5.29739000 | -2.67640900 | 0.45568500  |
| C | -6.26746300 | -3.66054000 | 0.44387500  |
| C | -7.58191400 | -3.35246300 | 0.05994800  |

|   |              |             |             |
|---|--------------|-------------|-------------|
| C | -7.90811500  | -2.04362700 | -0.30762500 |
| C | -6.91960700  | -1.06267900 | -0.29465700 |
| O | 8.49448900   | -4.33601700 | -0.07410500 |
| O | -8.46040000  | -4.38031600 | 0.07893900  |
| C | 9.83932400   | -4.07034000 | 0.30207400  |
| C | -9.80361800  | -4.11746400 | -0.30385700 |
| H | -2.84346200  | 4.01413100  | 0.08173200  |
| H | 2.89321500   | 4.04411600  | -0.07569900 |
| H | -2.72928200  | -1.50222100 | 0.00654300  |
| H | 2.76007000   | -1.46466700 | -0.01491300 |
| H | 7.22509100   | -0.01201500 | 0.59370400  |
| H | 8.94861700   | -1.73138200 | 0.60020500  |
| H | 6.06664600   | -4.64190600 | -0.72058600 |
| H | 4.32178300   | -2.89743300 | -0.75939400 |
| H | -4.29200500  | -2.93168300 | 0.77523200  |
| H | -6.03455300  | -4.67918900 | 0.73709800  |
| H | -8.91400400  | -1.77883900 | -0.60989900 |
| H | -7.19155300  | -0.05729300 | -0.60524000 |
| H | 10.36489700  | -5.02104600 | 0.21942100  |
| H | 9.89335300   | -3.71040100 | 1.33515300  |
| H | 10.29769300  | -3.33897500 | -0.37215300 |
| H | -10.32899100 | -5.06815100 | -0.21912500 |
| H | -9.85404400  | -3.76218800 | -1.33878600 |
| H | -10.26556500 | -3.38334700 | 0.36501900  |

SBDPiR731 in S<sub>1</sub> State

|   |             |             |             |
|---|-------------|-------------|-------------|
| C | 1.23585900  | 2.53169000  | -0.00727900 |
| N | 1.24211900  | 1.14590100  | -0.00474800 |
| B | 0.02798700  | 0.19989100  | 0.00010800  |
| N | -1.21011300 | 1.11015500  | 0.00575400  |
| C | -1.21123300 | 2.48943600  | 0.00768200  |
| C | 0.00156300  | 3.21502500  | -0.00031200 |
| C | -2.51198600 | 0.70035900  | 0.01298200  |
| C | -3.35582400 | 1.84824100  | 0.01927400  |
| C | -2.56456900 | 2.97628700  | 0.01677300  |
| C | 2.59472100  | 3.01497300  | -0.01583200 |
| C | 3.38490000  | 1.88746200  | -0.01771600 |
| C | 2.54360700  | 0.73938100  | -0.01137300 |
| C | -3.18830100 | -0.51976500 | 0.01214600  |
| C | -4.57127600 | -0.33464500 | 0.01835600  |
| S | -5.02887800 | 1.37894100  | 0.02800200  |
| S | 5.05911400  | 1.42217200  | -0.02629700 |
| C | 4.60435800  | -0.29267200 | -0.01638000 |

|   |              |             |             |
|---|--------------|-------------|-------------|
| C | 3.22226200   | -0.48024600 | -0.01020000 |
| F | 0.04616700   | -0.62376800 | 1.13582800  |
| F | 0.03655700   | -0.62301700 | -1.13628200 |
| C | -0.10744200  | 4.70409800  | -0.00124500 |
| F | 1.07716700   | 5.33202800  | -0.01020200 |
| F | -0.77768800  | 5.16651900  | 1.07959500  |
| F | -0.79253800  | 5.16402500  | -1.07389000 |
| C | 5.62505000   | -1.31343900 | -0.01670200 |
| C | -5.58901000  | -1.35783200 | 0.01815400  |
| C | 6.99398800   | -0.99445400 | 0.07777600  |
| C | 7.97583300   | -1.97453800 | 0.07866800  |
| C | 7.60329800   | -3.32300700 | -0.01560800 |
| C | 6.24211500   | -3.66622500 | -0.11119400 |
| C | 5.27635500   | -2.68380300 | -0.11282000 |
| C | -5.23650100  | -2.72743700 | 0.11363200  |
| C | -6.19940100  | -3.71247800 | 0.11092100  |
| C | -7.56156900  | -3.37295500 | 0.01474300  |
| C | -7.93789500  | -2.02534400 | -0.07878500 |
| C | -6.95896200  | -1.04254400 | -0.07668600 |
| O | 8.47174500   | -4.35087300 | -0.02343800 |
| O | -8.42684600  | -4.40316800 | 0.02123700  |
| C | 9.86238700   | -4.06104200 | 0.06658200  |
| C | -9.81847400  | -4.11791900 | -0.06988600 |
| H | -2.86298900  | 4.01416300  | 0.01998700  |
| H | 2.90329700   | 4.04708700  | -0.01916300 |
| H | -2.70819900  | -1.48985800 | -0.00075500 |
| H | 2.74376500   | -1.45114900 | 0.00274700  |
| H | 7.30975300   | 0.04204700  | 0.16025800  |
| H | 9.01662500   | -1.68394100 | 0.15451400  |
| H | 5.97423400   | -4.71519000 | -0.18694700 |
| H | 4.23470500   | -2.97518000 | -0.19600200 |
| H | -4.19412200  | -3.01604400 | 0.19710400  |
| H | -5.92870600  | -4.76075400 | 0.18612000  |
| H | -8.97945900  | -1.73768500 | -0.15510500 |
| H | -7.27753800  | -0.00686300 | -0.15865300 |
| H | 10.36822600  | -5.02530900 | 0.04232200  |
| H | 10.09325100  | -3.54783300 | 1.00581500  |
| H | 10.18875400  | -3.45252300 | -0.78316800 |
| H | -10.32093300 | -5.08397400 | -0.04700000 |
| H | -10.05003700 | -3.60471200 | -1.00891500 |
| H | -10.14765700 | -3.51132000 | 0.78011500  |

SBDPiR731 in S<sub>2</sub> State

|   |             |             |             |
|---|-------------|-------------|-------------|
| C | 1.24094300  | 2.59629600  | -0.01970400 |
| N | 1.24516400  | 1.18878100  | -0.02191500 |
| B | 0.01725000  | 0.23081900  | 0.00602700  |
| N | -1.20709100 | 1.14280100  | 0.02280100  |
| C | -1.21602100 | 2.53930800  | 0.01926000  |
| C | -0.00462700 | 3.26813500  | 0.00104900  |
| C | -2.50191300 | 0.72116200  | 0.04419400  |
| C | -3.34632000 | 1.84393100  | 0.05079900  |
| C | -2.54866800 | 2.99886000  | 0.03560800  |
| C | 2.57240500  | 3.04667100  | -0.04114400 |
| C | 3.37449800  | 1.88061100  | -0.05867700 |
| C | 2.52970600  | 0.76227700  | -0.04730200 |
| C | -3.17849400 | -0.52744400 | 0.04747100  |
| C | -4.54188400 | -0.35101100 | 0.06048600  |
| S | -4.99883500 | 1.35931800  | 0.07382800  |
| S | 5.00345800  | 1.39288500  | -0.08921600 |
| C | 4.57128300  | -0.31845000 | -0.06467600 |
| C | 3.20296400  | -0.49292000 | -0.04757400 |
| F | 0.08099600  | -0.57470300 | 1.14663100  |
| F | 0.04000000  | -0.58878400 | -1.12600300 |
| C | -0.10974300 | 4.75291500  | 0.00185900  |
| F | 1.08229600  | 5.37346200  | -0.01199800 |
| F | -0.77069000 | 5.22557800  | 1.08538800  |
| F | -0.79534600 | 5.22522200  | -1.06670600 |
| C | 5.61801700  | -1.34020400 | -0.07959500 |
| C | -5.58162200 | -1.38263300 | 0.07869700  |
| C | 6.89269500  | -1.09881400 | 0.44383300  |
| C | 7.88222200  | -2.07982700 | 0.43019300  |
| C | 7.59645300  | -3.33694000 | -0.11054900 |
| C | 6.32201700  | -3.59443900 | -0.63805500 |
| C | 5.35153900  | -2.60985000 | -0.62675500 |
| C | -5.30109300 | -2.66008500 | 0.60046300  |
| C | -6.26419200 | -3.65285300 | 0.61026300  |
| C | -7.54808800 | -3.39685000 | 0.10680800  |
| C | -7.85052100 | -2.13281900 | -0.40591200 |
| C | -6.86779000 | -1.14386000 | -0.41719000 |
| O | 8.47912200  | -4.36053600 | -0.17063700 |
| O | -8.42421700 | -4.42949200 | 0.16316000  |
| C | 9.78332600  | -4.14797100 | 0.35148500  |
| C | -9.73682000 | -4.21434600 | -0.33382100 |
| H | -2.86681100 | 4.03088100  | 0.03645700  |
| H | 2.90885700  | 4.07051100  | -0.04407700 |
| H | -2.69688100 | -1.49743500 | 0.01630000  |

|   |              |             |             |
|---|--------------|-------------|-------------|
| H | 2.71840200   | -1.46143800 | -0.01205500 |
| H | 7.12726700   | -0.13815700 | 0.89578000  |
| H | 8.85499300   | -1.85637500 | 0.85138900  |
| H | 6.12116500   | -4.57247600 | -1.06354100 |
| H | 4.37888400   | -2.81702200 | -1.06271400 |
| H | -4.32086300  | -2.86766500 | 1.01884100  |
| H | -6.04956900  | -4.63615100 | 1.01685500  |
| H | -8.83227900  | -1.90776400 | -0.80505700 |
| H | -7.11667400  | -0.17539200 | -0.84334700 |
| H | 10.32150000  | -5.08292800 | 0.19896300  |
| H | 9.74473400   | -3.91909700 | 1.42208200  |
| H | 10.29405800  | -3.34054000 | -0.18431700 |
| H | -10.26858200 | -5.15459100 | -0.19041500 |
| H | -9.71737800  | -3.96520300 | -1.40057300 |
| H | -10.24370500 | -3.41942800 | 0.22422100  |

SBDPiR731 in T<sub>1</sub> State

|   |             |             |             |
|---|-------------|-------------|-------------|
| C | 1.23273900  | 2.52206900  | -0.01607600 |
| N | 1.24078000  | 1.14788900  | -0.01721900 |
| B | 0.02976300  | 0.19870000  | -0.00286300 |
| N | -1.20764300 | 1.11129500  | 0.01427100  |
| C | -1.20883200 | 2.47777600  | 0.01469200  |
| C | 0.00075700  | 3.21277800  | -0.00074600 |
| C | -2.51926900 | 0.69602800  | 0.03225900  |
| C | -3.36093900 | 1.84699300  | 0.04030200  |
| C | -2.56980700 | 2.97003500  | 0.03131900  |
| C | 2.59783600  | 3.01113000  | -0.03065800 |
| C | 3.38957700  | 1.88845500  | -0.04044500 |
| C | 2.55181800  | 0.73763100  | -0.03439500 |
| C | -3.18970900 | -0.52003300 | 0.03787200  |
| C | -4.57593800 | -0.33343800 | 0.05042600  |
| S | -5.03322700 | 1.37871000  | 0.05935400  |
| S | 5.06331300  | 1.42530300  | -0.05868700 |
| C | 4.61022600  | -0.28827600 | -0.05064900 |
| C | 3.22689700  | -0.47870800 | -0.03969900 |
| F | 0.05645900  | -0.62390000 | 1.13200700  |
| F | 0.02791400  | -0.62102100 | -1.14016100 |
| C | -0.11162300 | 4.69358400  | 0.00032500  |
| F | 1.07323300  | 5.32454100  | -0.01695700 |
| F | -0.77698300 | 5.16527200  | 1.08504000  |
| F | -0.80766400 | 5.16430700  | -1.06551700 |
| C | 5.63821000  | -1.31103900 | -0.05678500 |
| C | -5.59903400 | -1.35866500 | 0.05646200  |



|   |              |             |             |
|---|--------------|-------------|-------------|
| C | 6.98376100   | -1.00625300 | 0.20862400  |
| C | 7.96854000   | -1.98685800 | 0.21386400  |
| C | 7.61723700   | -3.31575400 | -0.05150500 |
| C | 6.27825200   | -3.64127800 | -0.32682300 |
| C | 5.31004500   | -2.65858000 | -0.33045500 |
| C | -5.26437500  | -2.70861000 | 0.31338500  |
| C | -6.22966000  | -3.69350600 | 0.30989200  |
| C | -7.57248100  | -3.36893600 | 0.05083000  |
| C | -7.93036300  | -2.03814700 | -0.19826800 |
| C | -6.94879500  | -1.05519500 | -0.19263500 |
| O | 8.48996300   | -4.34416700 | -0.06758400 |
| O | -8.44137900  | -4.39932700 | 0.06539400  |
| C | 9.85641300   | -4.06894200 | 0.21516500  |
| C | -9.81210700  | -4.12651600 | -0.20021700 |
| H | -2.86230000  | 4.00913800  | 0.03412400  |
| H | 2.90001000   | 4.04471400  | -0.03170000 |
| H | -2.70999300  | -1.49021200 | 0.01179300  |
| H | 2.75055400   | -1.45062600 | -0.01411500 |
| H | 7.27945000   | 0.01459700  | 0.43517500  |
| H | 8.99315100   | -1.70949100 | 0.42954500  |
| H | 6.02711500   | -4.67503300 | -0.54132200 |
| H | 4.28698500   | -2.93364000 | -0.56439600 |
| H | -4.23852900  | -2.98408000 | 0.53376000  |
| H | -5.97378700  | -4.72865300 | 0.51152900  |
| H | -8.95789700  | -1.76180700 | -0.40095500 |
| H | -7.24983900  | -0.03298000 | -0.40530500 |
| H | 10.37192800  | -5.02635600 | 0.15015600  |
| H | 9.97110700   | -3.65800200 | 1.22380300  |
| H | 10.27629000  | -3.37578300 | -0.52126600 |
| H | -10.32304900 | -5.08657700 | -0.13915700 |
| H | -9.93860200  | -3.70625600 | -1.20351200 |
| H | -10.22630900 | -3.44225700 | 0.54756500  |

SBDPiR731 in T<sub>2</sub> State

|   |             |            |             |
|---|-------------|------------|-------------|
| C | 1.23893800  | 2.61021200 | -0.02656100 |
| N | 1.25432400  | 1.19333400 | -0.02958800 |
| B | 0.00949400  | 0.22822900 | -0.00040300 |
| N | -1.20884100 | 1.13536300 | 0.02318100  |
| C | -1.21598600 | 2.52641000 | 0.02211500  |
| C | 0.00944400  | 3.25719500 | -0.00063800 |
| C | -2.50950200 | 0.72077900 | 0.04898800  |
| C | -3.34538100 | 1.84342000 | 0.06180900  |
| C | -2.53910900 | 2.99568400 | 0.04516300  |

|   |             |             |             |
|---|-------------|-------------|-------------|
| C | 2.58942800  | 3.06278600  | -0.05280900 |
| C | 3.38756400  | 1.87678200  | -0.07232400 |
| C | 2.53659400  | 0.76171900  | -0.05781400 |
| C | -3.19400000 | -0.52652300 | 0.05109200  |
| C | -4.55274100 | -0.34211900 | 0.06939300  |
| S | -5.00885600 | 1.36743900  | 0.08969900  |
| S | 5.00430700  | 1.39140700  | -0.09886400 |
| C | 4.56800100  | -0.32547000 | -0.06931900 |
| C | 3.20346000  | -0.49564600 | -0.05351900 |
| F | 0.10418500  | -0.57190500 | 1.13842900  |
| F | 0.05578100  | -0.57901600 | -1.13718400 |
| C | -0.09828400 | 4.74826000  | 0.00356700  |
| F | 1.09405600  | 5.36829200  | -0.01630400 |
| F | -0.74936100 | 5.20916900  | 1.09284700  |
| F | -0.78688000 | 5.21255500  | -1.06118200 |
| C | 5.61942700  | -1.34488500 | -0.08536700 |
| C | -5.59575600 | -1.37486400 | 0.08711700  |
| C | 6.87919300  | -1.11458200 | 0.47572600  |
| C | 7.86998000  | -2.09502900 | 0.46360000  |
| C | 7.59857300  | -3.33900100 | -0.11299700 |
| C | 6.33823500  | -3.58452600 | -0.67835000 |
| C | 5.36717500  | -2.60010900 | -0.66934000 |
| C | -5.32691300 | -2.64293100 | 0.63528800  |
| C | -6.29044200 | -3.63633800 | 0.64233000  |
| C | -7.56392500 | -3.38856400 | 0.11057700  |
| C | -7.85571700 | -2.13314000 | -0.42759800 |
| C | -6.87162500 | -1.14444100 | -0.43661400 |
| O | 8.48331900  | -4.36101900 | -0.17488300 |
| O | -8.44236100 | -4.42124800 | 0.16653500  |
| C | 9.77307100  | -4.16086800 | 0.38636900  |
| C | -9.74387100 | -4.21275800 | -0.35999800 |
| H | -2.85037100 | 4.02969400  | 0.04986400  |
| H | 2.93578300  | 4.08260600  | -0.05733700 |
| H | -2.71940500 | -1.49987200 | 0.01472200  |
| H | 2.71476600  | -1.46185900 | -0.01670400 |
| H | 7.10122100  | -0.16500100 | 0.95685400  |
| H | 8.83199400  | -1.88121200 | 0.91363800  |
| H | 6.14874400  | -4.55253200 | -1.13112800 |
| H | 4.40516400  | -2.79619800 | -1.13344400 |
| H | -4.35465800 | -2.84307300 | 1.07567800  |
| H | -6.08375500 | -4.61296600 | 1.06883000  |
| H | -8.82976800 | -1.91418800 | -0.84865200 |
| H | -7.11007500 | -0.18251100 | -0.88297300 |
| H | 10.31500300 | -5.09271400 | 0.22822200  |

|   |              |             |             |
|---|--------------|-------------|-------------|
| H | 9.70602900   | -3.95483300 | 1.46019200  |
| H | 10.29814400  | -3.34252200 | -0.11817500 |
| H | -10.27937600 | -5.15071200 | -0.21480600 |
| H | -9.70304100  | -3.97803900 | -1.42953000 |
| H | -10.26213900 | -3.41007100 | 0.17627000  |
